# Supplementary material for: De novo design of energy transfer proteins housing excitonically coupled chlorophyll special pairs
Source: Research Square preprint supplement (doi:10.21203/rs.3.rs-2736786/v1), 2023-04-21
Supplement: Supplementary file 1 [file 696abf85c9f821e649119155.docx]

**Supplementary Information for**

*De novo* design of energy transfer proteins housing excitonically coupled chlorophyll special pairs

Nathan M. Ennist1,2, Shunzhi Wang1,2, Madison A. Kennedy2,3, Mariano Curti4, George A. Sutherland5, Cvetelin Vasilev5, Rachel L. Redler6, Valentin Maffeis4, Saeed Shareef4,7, Anthony V. Sica8, Ash Sueh Hua8, Arundhati P. Deshmukh8, Adam P. Moyer1,2, Derrick R. Hicks1,2, Avi Z. Swartz1,2, Ralph A. Cacho1,2, Nathan Novy1,2, Asim K. Bera1,2, Alex Kang1,2, Banumathi Sankaran9, Matthew P. Johnson5, Mike Reppert10, Damian Ekiert6,11, Gira Bhabha6, Lance Stewart1,2, Justin R. Caram8, Barry L. Stoddard3, Elisabet Romero4, C. Neil Hunter5, David Baker1,2,12

1Institute for Protein Design, University of Washington, Seattle, WA 98195; 2Department of Biochemistry, University of Washington, Seattle, WA 98195; 3Division of Basic Sciences, Fred Hutchinson Cancer Center, Seattle, WA 98109; 4Institute of Chemical Research of Catalonia (ICIQ-CERCA), Barcelona Institute of Science and Technology (BIST), Tarragona, Spain; 5Department of Molecular Biology and Biotechnology, University of Sheffield, Sheffield S10 2TN, UK; 6Department of Cell Biology and Skirball Institute of Biomolecular Medicine, New York University School of Medicine, New York, NY; 7Departament de Química Física i Inorgànica, Universitat Rovira i Virgili, Tarragona, Spain; 8Department of Chemistry and Biochemistry, University of California, Los Angeles, CA 90095; 9Molecular Biophysics and Integrated Bioimaging, Berkeley Center for Structural Biology, Lawrence Berkeley National Laboratory, Berkeley, CA 94720; 10Department of Chemistry, Purdue University, West Lafayette, IN 47907; 11Department of Microbiology, New York University School of Medicine, New York, NY; 12Howard Hughes Medical Institute, University of Washington, Seattle, WA 98195.

**
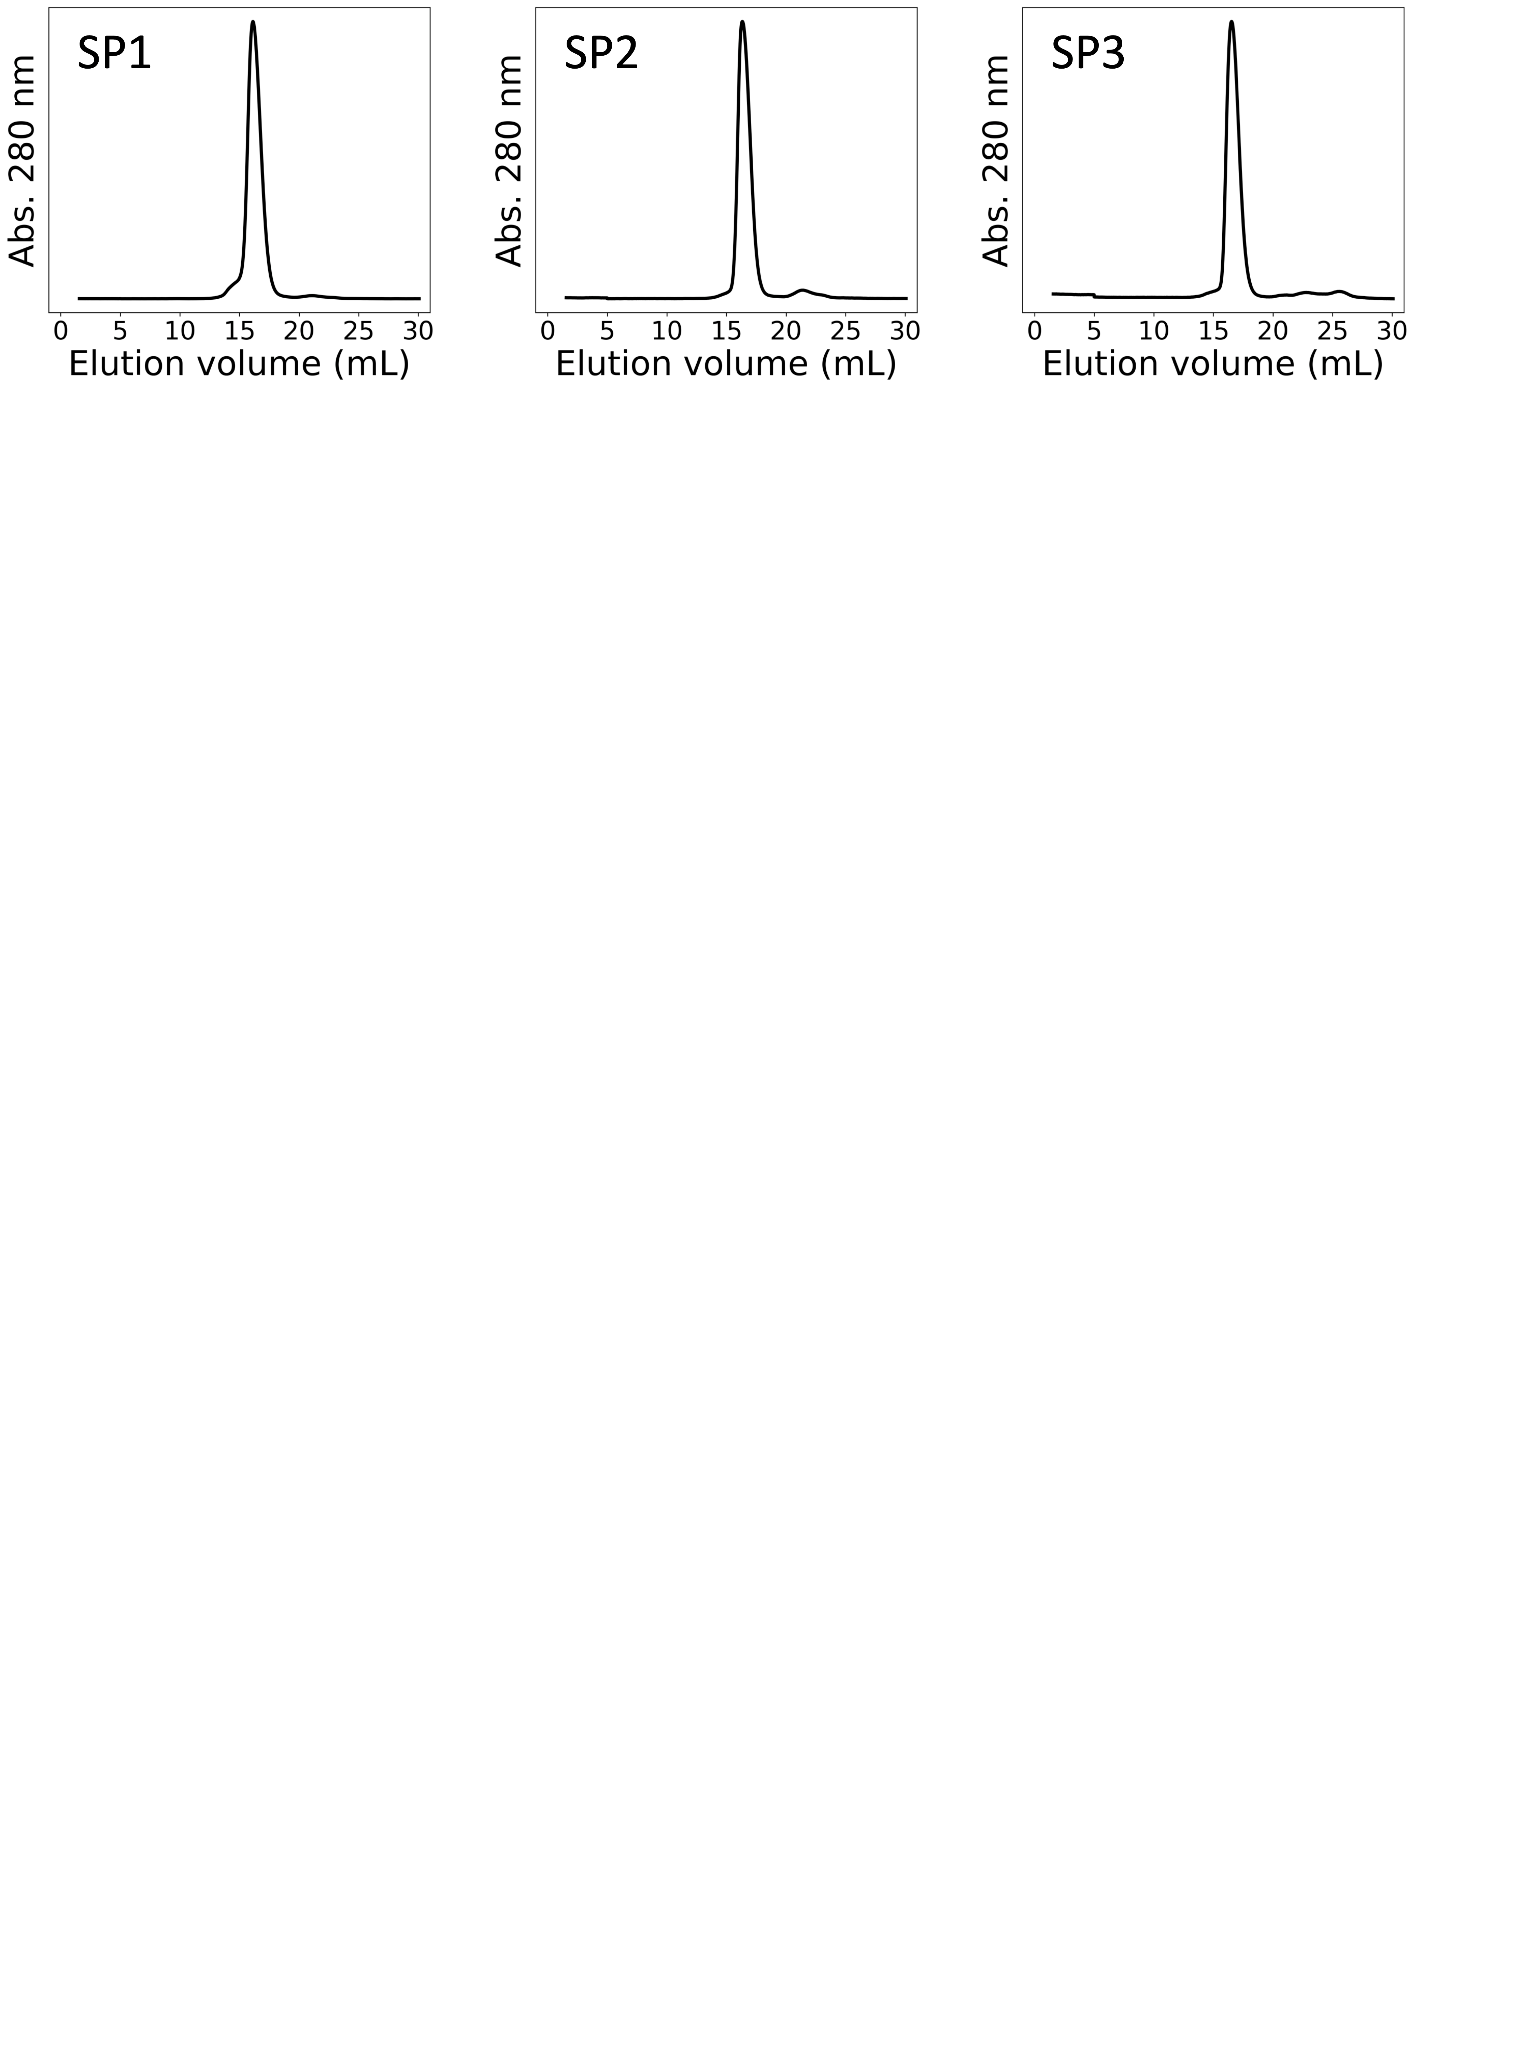
**

**Supplementary Figure 1 | Size exclusion chromatography (SEC) traces of purified SP apo-proteins.** Proteins were injected as 0.5 mL aliquots onto a Superdex™ 200 Increase 10/300 GL column (Cytiva Life Sciences). The narrow, isolated peaks indicate that the samples contain monodisperse protein. Running buffer was 150 mM NaCl, 10 mM Tris at pH 8. Proteins were purified by Ni-NTA and one round of SEC prior to collecting the data shown.

**
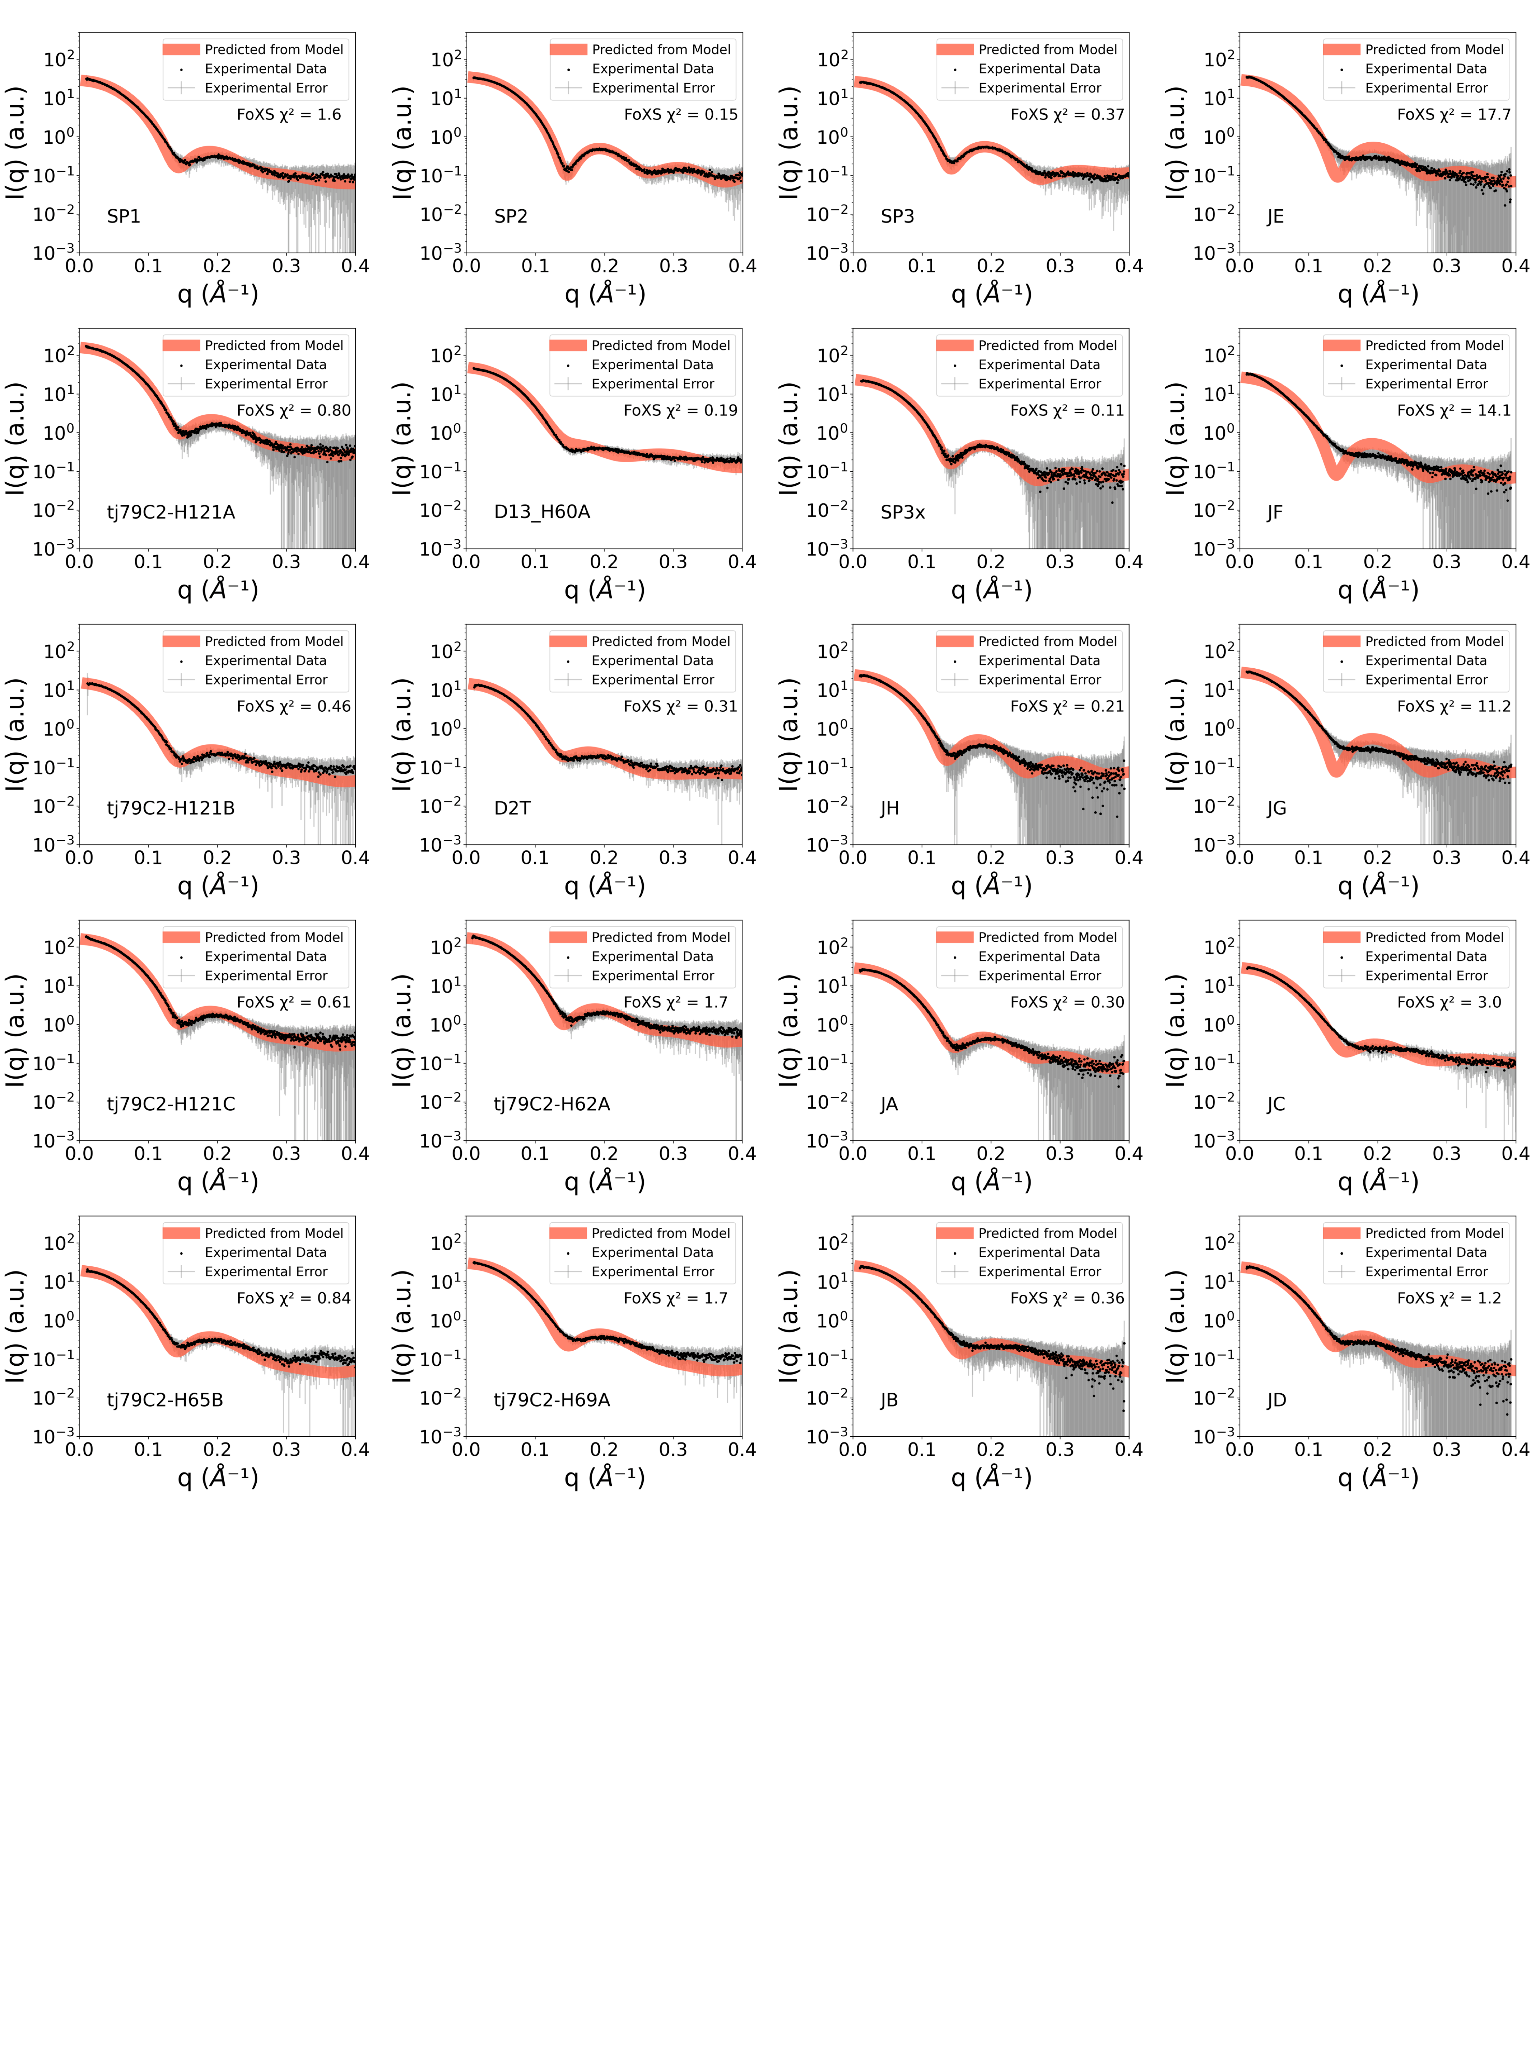
**

**Supplementary Figure 2 | Small angle X-ray scattering (SAXS) data and predictions.** Data were collected on SEC-purified samples of 20-100 μM protein (dimer concentration) in the apo-state with 150 mM NaCl and 10 mM Tris at pH 8. Data were collected using the SIBYLS high throughput SAXS pipeline [(Dyer et al. 2014)](https://paperpile.com/c/1ZjmK7/t6an). Comparisons of SAXS data (black data points with gray standard deviation error bars) and SAXS profiles calculated from apo-states of design models (red lines) were performed using the FoXS server [(Schneidman-Duhovny et al. 2013, 2016)](https://paperpile.com/c/1ZjmK7/20Kw+uAZA). Data sets with good agreement between data and FoXS prediction (as measured by χ2 and radii of gyration, see Supplementary Table 2) are shown in the left 3 columns. These proteins likely fold as designed; SP1, SP2, and SP3x structures were verified by X-ray crystallography. The right column shows data sets with poorer agreement between SAXS data and predictions.


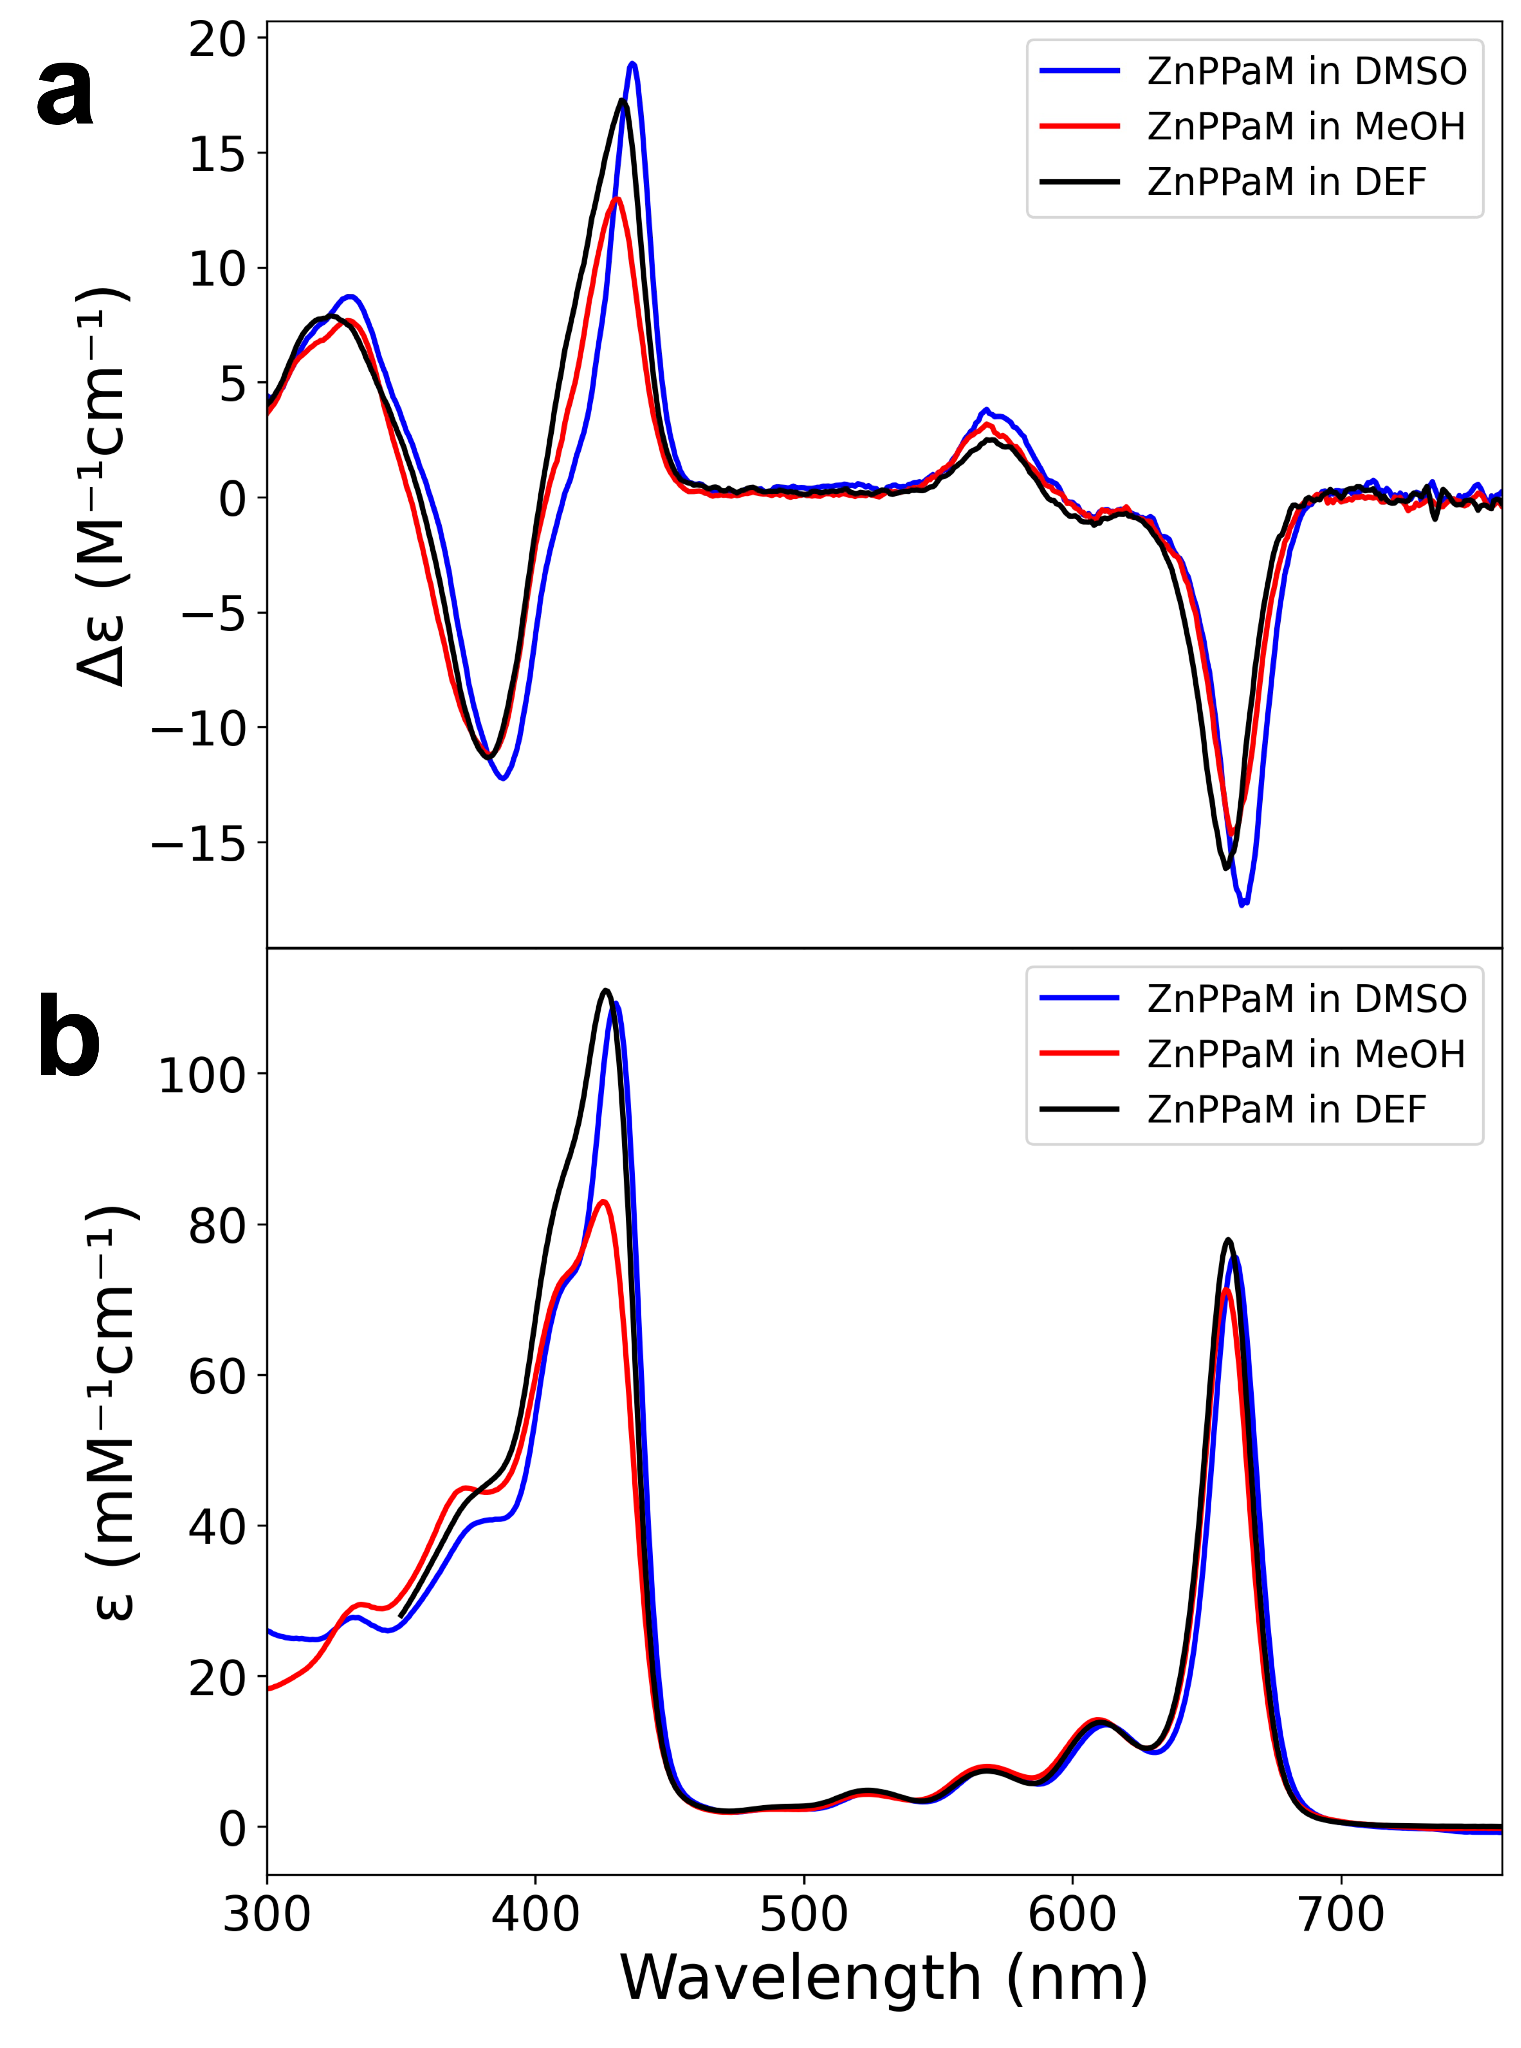


**Supplementary Figure 3 | CD and absorbance spectra of Zn pheophorbide *a* methyl ester (ZnPPaM) in organic solvents.** (a) CD spectra of ZnPPaM (plotted as difference molar extinction coefficients, Δε) in dimethyl sulfoxide (DMSO), methanol (MeOH), and diethylformamide (DEF). Spectra were collected with 15 μM ZnPPaM in 1 cm cuvettes. Spectra of 1, 5, and 75 μM ZnPPaM in DEF (not shown) did not differ appreciably from the 15 μM ZnPPaM spectrum in DEF (black trace), meaning that there is no sign of concentration-dependent aggregation. All CD spectra were collected on a Jasco J-1500 CD spectrophotometer at 25°C. Each spectrum is the average of 10 scans using a 3 nm bandwidth, 50 nm/min scanning speed, 4 second data integration time, and a data interval of 1 nm. (b) Molar absorptivity (ε) of the same samples collected using a Jasco V-750 spectrophotometer with a 1 nm bandwidth, 400 nm/min scanning speed, 0.24 second ultraviolet/visible (UV/vis) response, and a data interval of 1 nm.


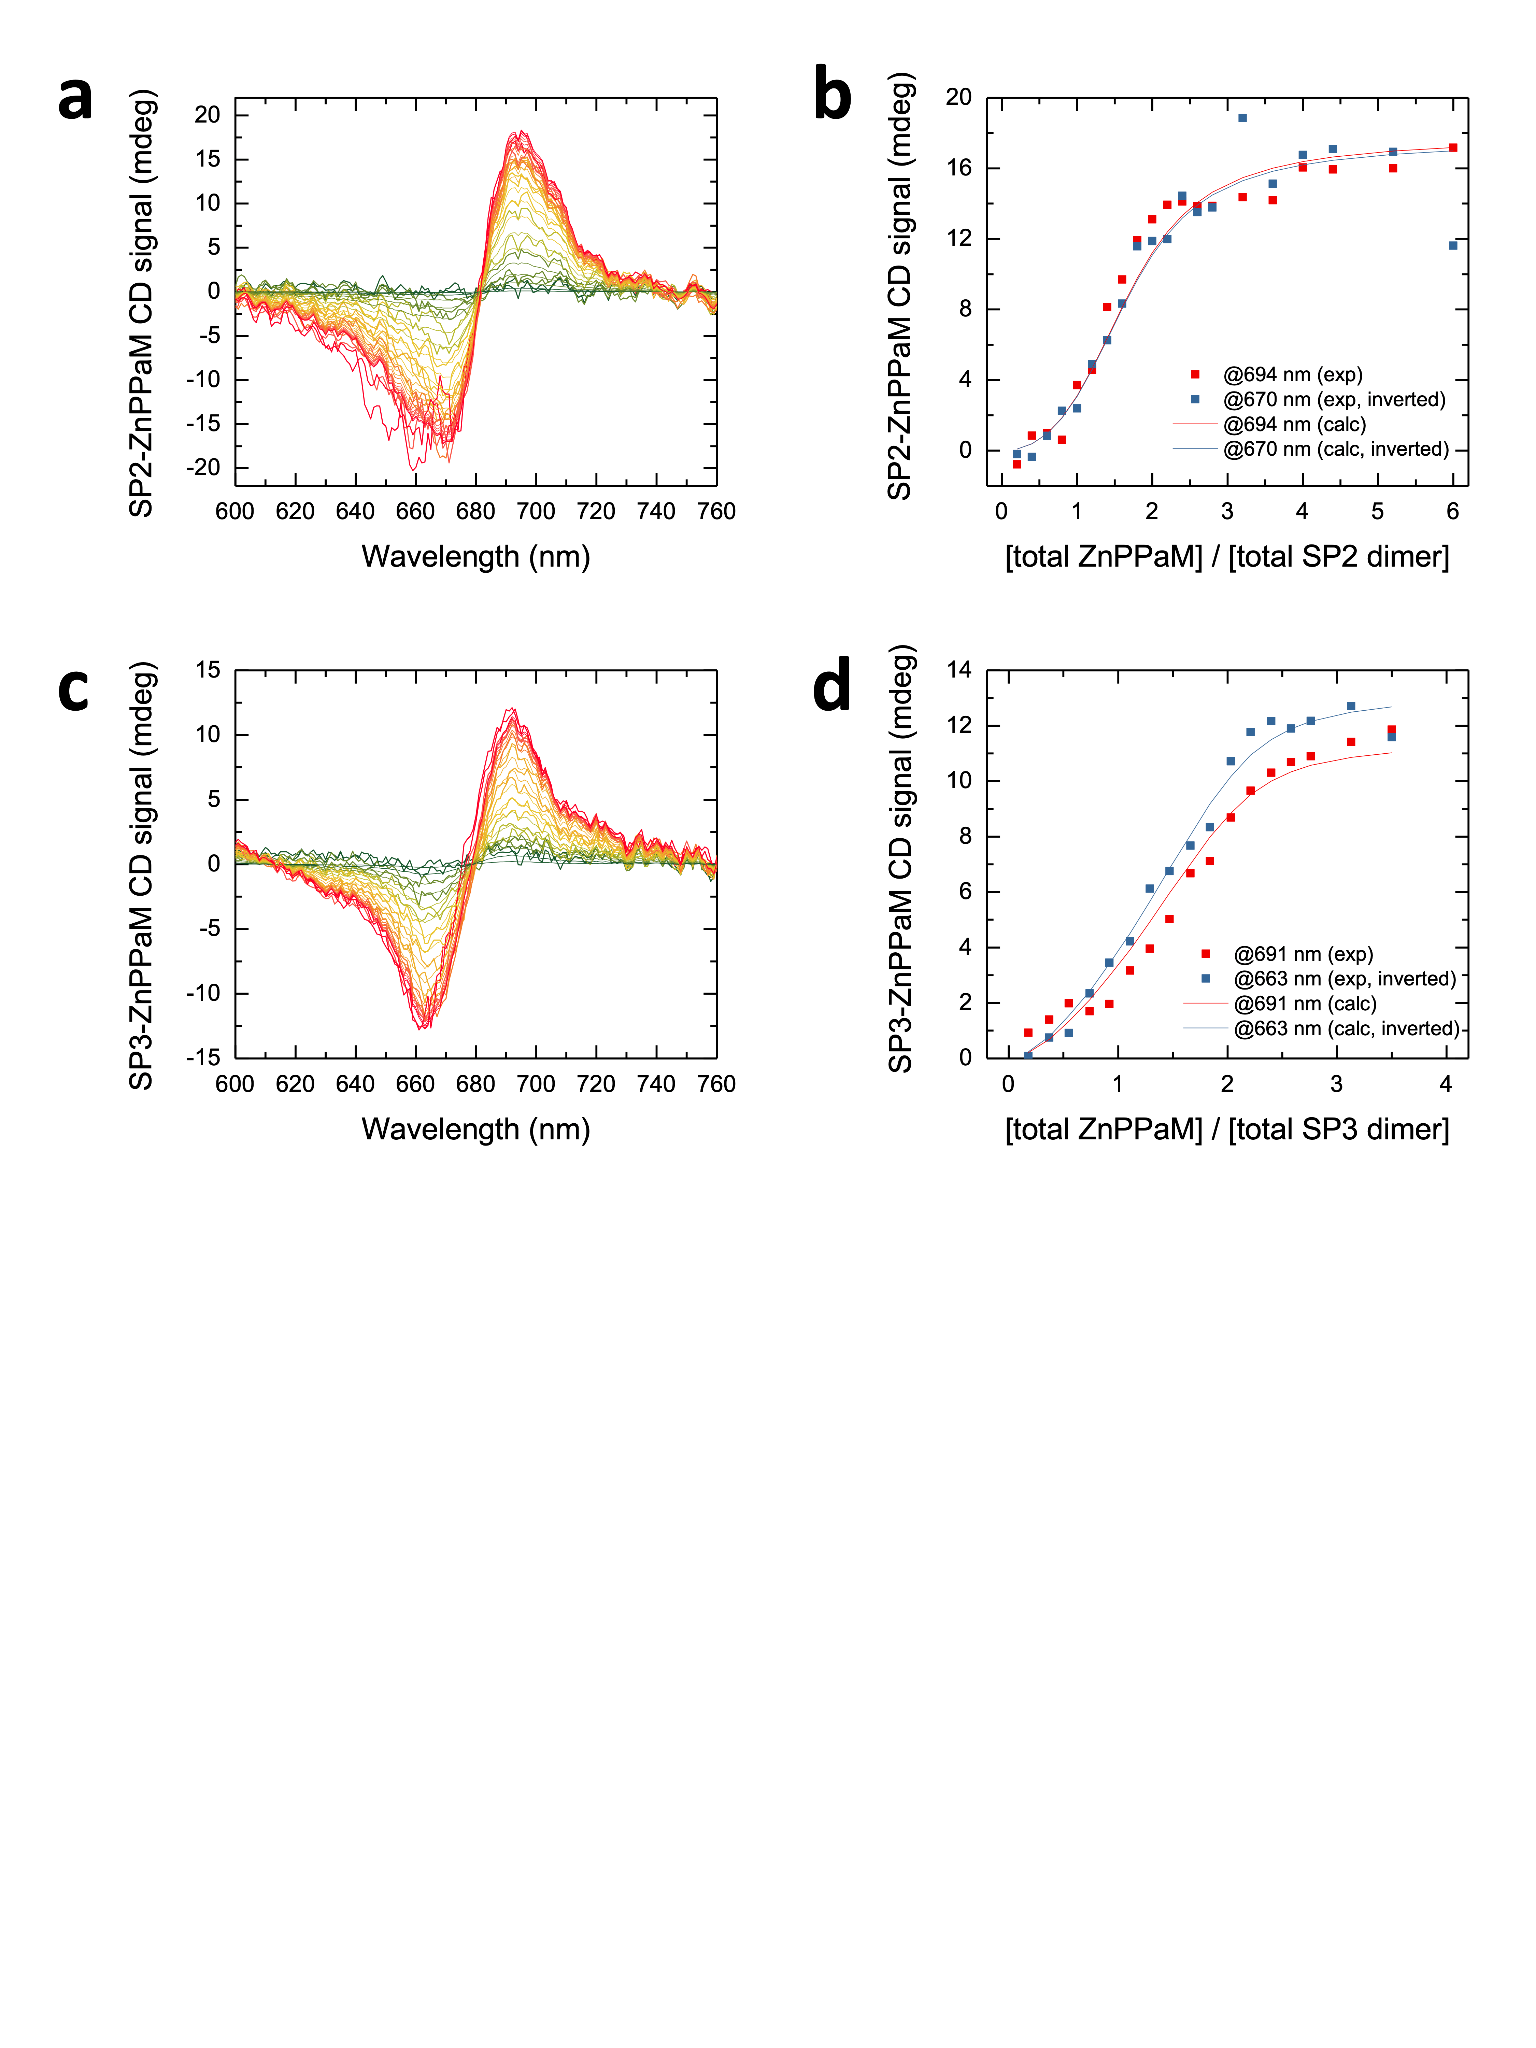


**Supplementary Figure 4 | SP2- and SP3-ZnPPaM binding titrations monitored by CD.** (a) Measured and fitted CD spectra of 10.0 μM SP2 (dimer concentration) with increasing concentration of ZnPPaM. Titration was carried out in a 1 cm pathlength cuvette with 2.5 mL of 150 mM NaCl and 10 mM Tris at pH 8, and ZnPPaM was added from a DMSO stock solution. Approximately 20 minutes of incubation with stirring were allowed after each addition of ZnPPaM before the measurement of each spectrum. Spectra were measured on a Jasco J-1500 CD spectrophotometer at 25°C. Each spectrum was collected with a 1 nm bandwidth, 50 nm/min scanning speed, 2 second data integration time, and a data pitch of 1 nm. (b) Plots of the CD signal in panel (a) at 694 nm and the inverted CD signal at 670 nm (exp.) along with curve fits of the data (calc.). Curve fitting was performed under the assumption of a P + L → PL and PL + L → PL2 mechanism in which the CD signal arises from PL2. (P represents SP2 dimer protein and L represents ZnPPaM ligand). Fitting yielded SP2-ZnPPaM dissociation constant estimates of 320 nM for KD1 and 2.5 μM for KD2. Fittings were performed with an algorithm that combines singular value decomposition and least squares regression, as implemented in ReactLab Equilibria. Estimates of KD1 values using this method are of low confidence due to the weak CD signal of PL. (c) SP3-ZnPPaM titration performed as in panel (a) with 10.9 μM SP3 (protein dimer concentration). (d) Plots and curve fitting of the SP3-ZnPPaM titration as in panel (b). Estimated SP3-ZnPPaM dissociation constants were 800 nM for KD1 and 1.0 μM for KD2.


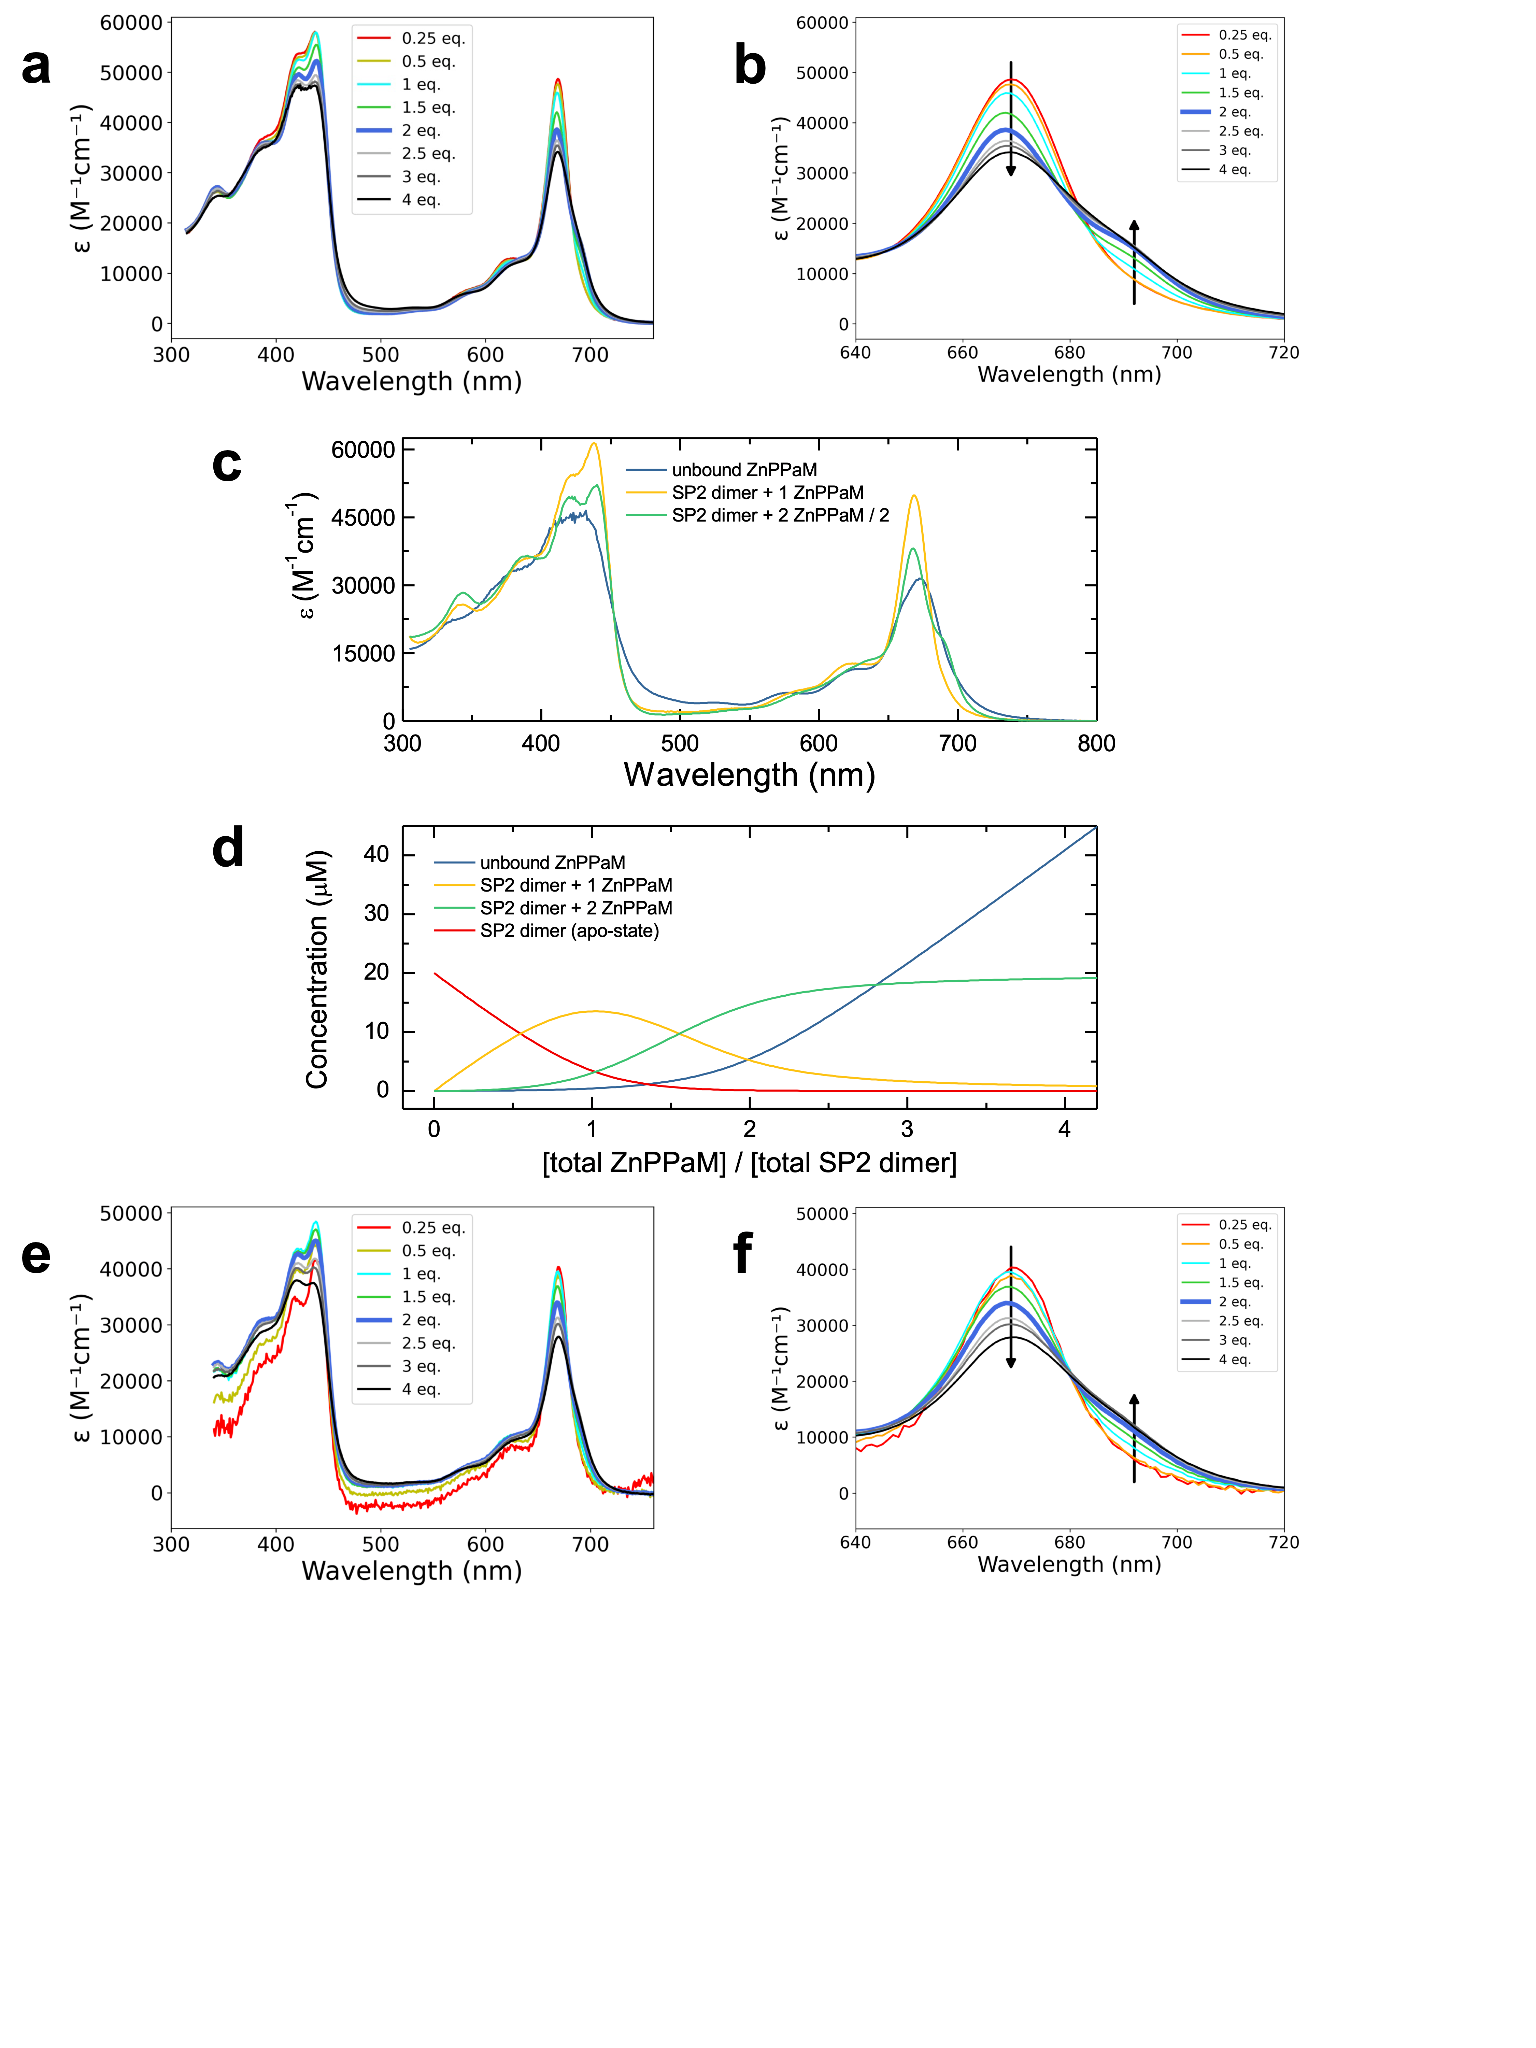


**Supplementary Figure 5 | SP2-ZnPPaM binding titration monitored by UV/vis absorbance.** (a) UV/vis titration of ZnPPaM into a solution of 20 μM SP2 dimer (40 μM of SP2 monomer) in 150 mM NaCl, and 10 mM Tris at pH 8. Samples were prepared separately with 0.25 to 4 equivalents (eq.) of ZnPPaM per SP2 protein dimer (2.0 eq. ZnPPaM would be a stoichiometric amount). The y-axis is the molar extinction coefficient, ε, or OD divided by ZnPPaM concentration. ZnPPaM was added to protein samples from a DMSO stock solution. Samples were incubated overnight for 20 hours at 4°C before measurement at room temperature. (b) The same data as in panel (a) zoomed in on the Qy region. Arrows indicate the direction ε changes as a function of increasing ZnPPaM concentration. (c) Fitted spectra and (d) species concentration vs. molar ratio of ligand to protein from fitting of the absorbance spectra in panels (a) and (b). During fitting, only the P + L → PL and PL + L → PL2 reactions were considered, and ZnPPaM aggregation was disregarded. (P represents SP2 dimer protein and L represents ZnPPaM ligand). Curve fitting gives dissociation constants (KDs) of 110 nM and 2.0 μM for KD1 and KD2, respectively. Fittings were performed with an algorithm that combines singular value decomposition and least squares regression, as implemented in ReactLab Equilibria. (e) Full spectra and (f) the Qy region of a second titration with SP2 dimer protein concentration held at 2.0 μM. At 2.0 μM protein, the intensities of the spectral features at 669 and 692 nm depend upon the molar ratio of protein to ZnPPaM in a manner similar to the 20 μM protein titration shown in panels (a) and (b).

**
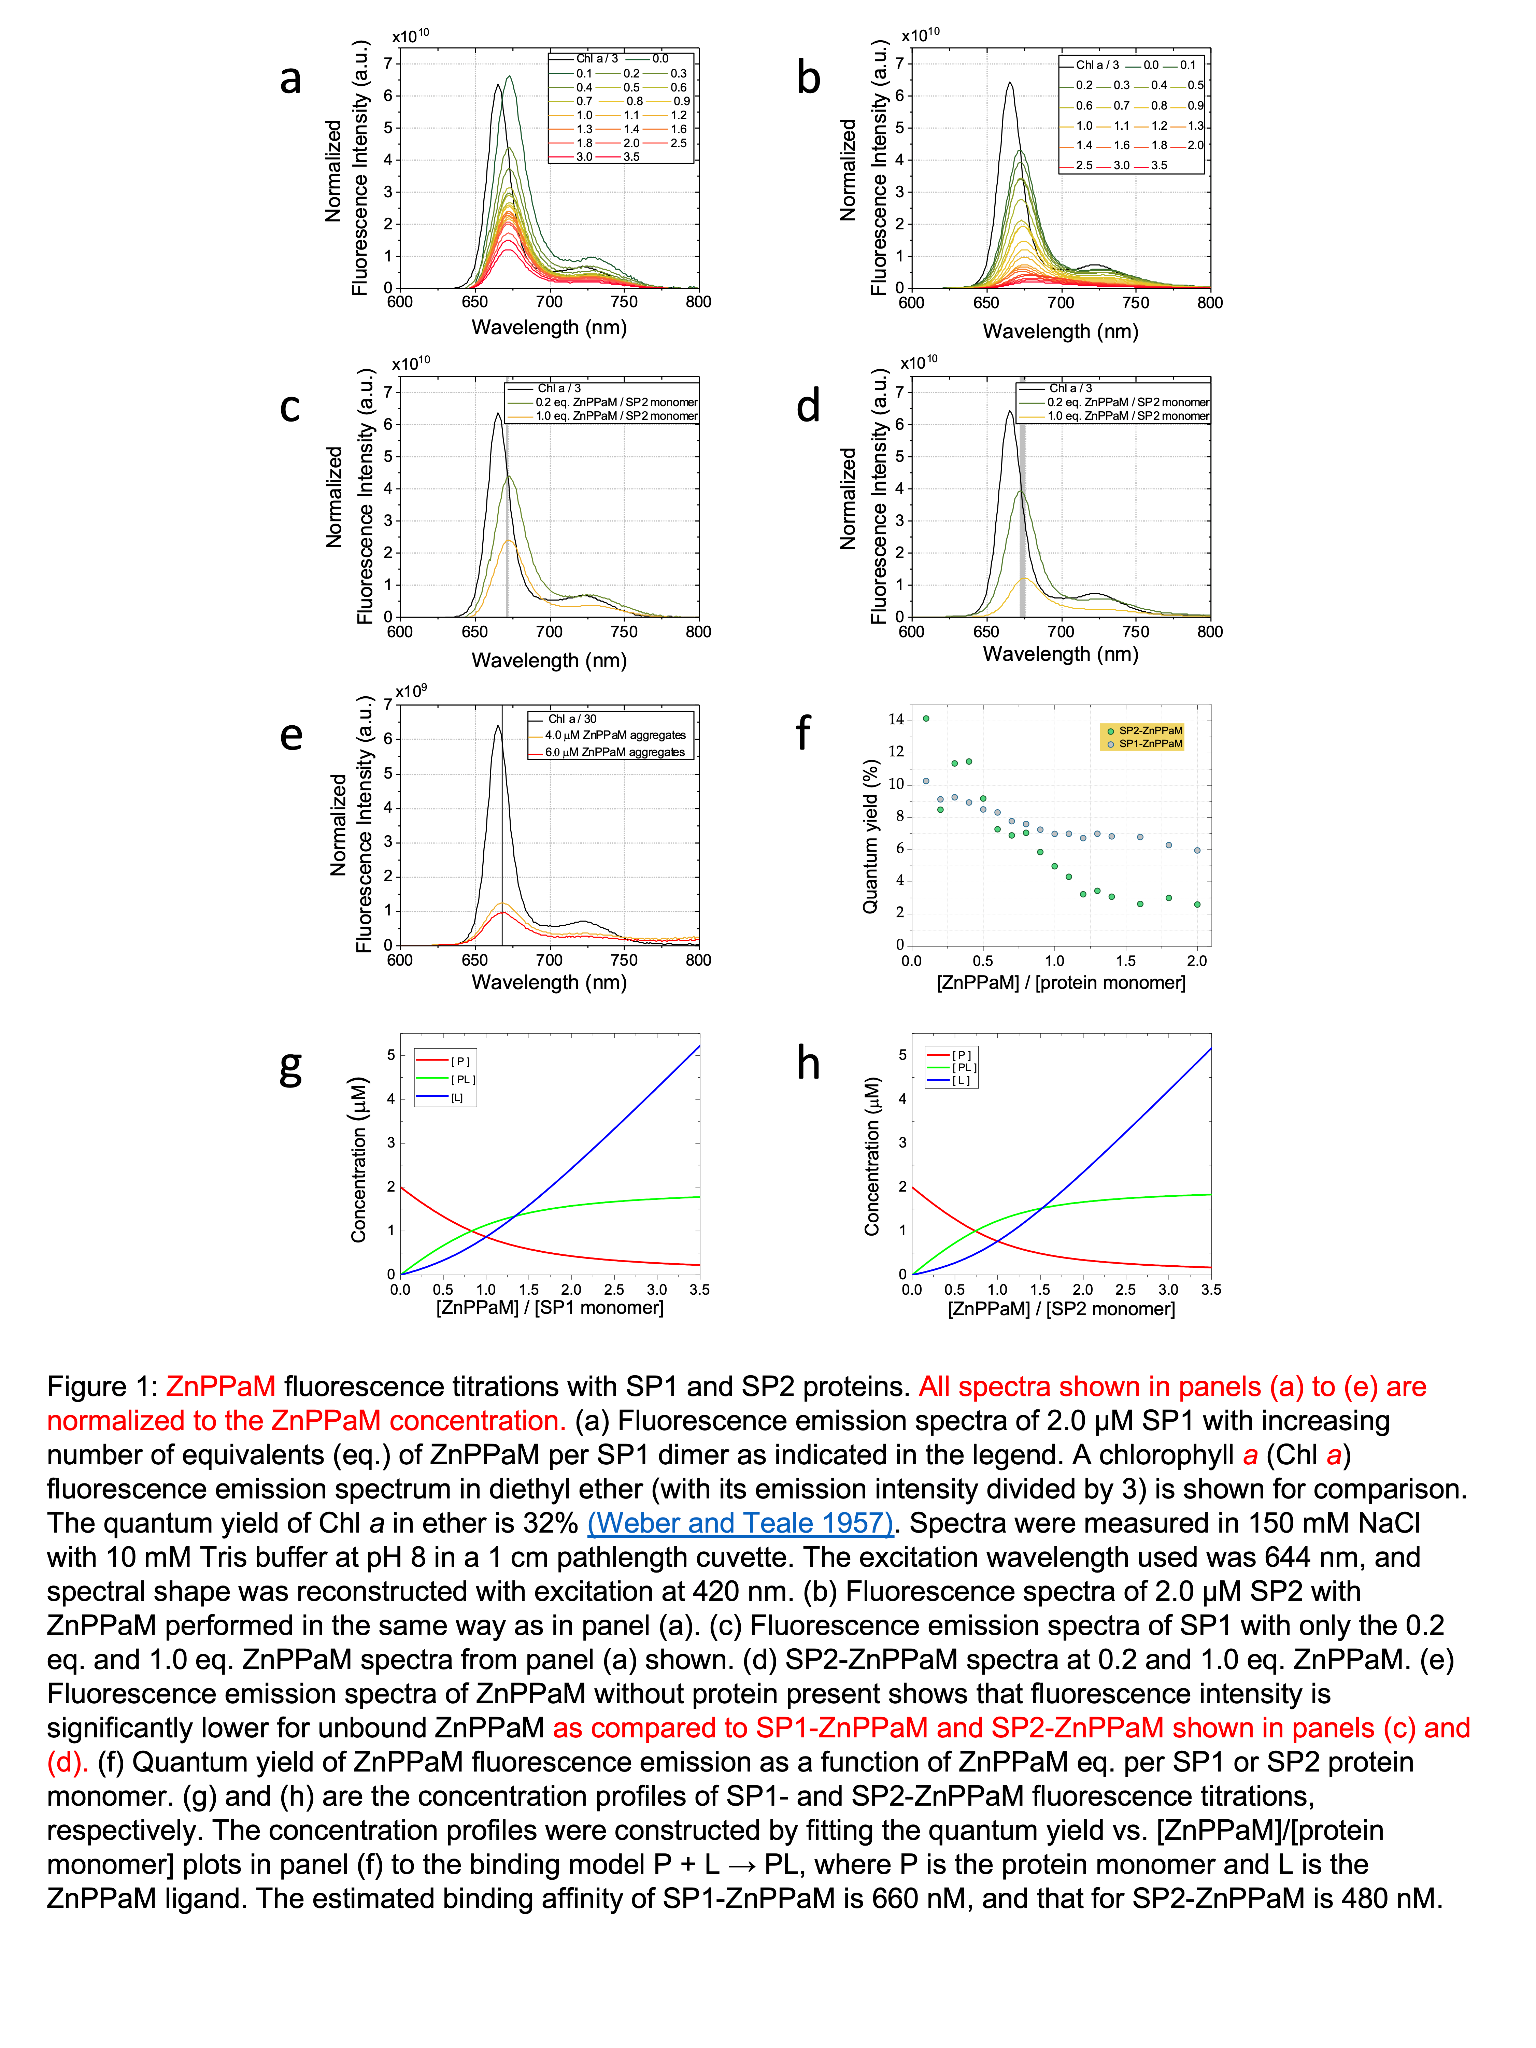
**

**Supplementary Figure 6 | ZnPPaM fluorescence titrations with SP1 and SP2 proteins.** All spectra shown in panels (a) to (e) are normalized to the pigment concentration. (a) Fluorescence emission spectra of 2.0 μM SP1 with increasing number of equivalents (eq.) of ZnPPaM per SP1 dimer as indicated in the legend. A chlorophyll *a* (Chl *a*) fluorescence emission spectrum in diethyl ether (with its emission intensity divided by 3) is shown for comparison. The quantum yield of Chl *a* in ether is 32% [(Weber and Teale 1957)](https://paperpile.com/c/1ZjmK7/K8BN). Spectra were measured in 150 mM NaCl with 10 mM Tris buffer at pH 8 in a 1 cm pathlength cuvette. The excitation wavelength used was 644 nm, and spectral shape was reconstructed with excitation at 420 nm. (b) Fluorescence spectra of 2.0 μM SP2 with ZnPPaM performed in the same way as in panel (a). (c) Fluorescence emission spectra of SP1 with only the 0.2 eq. and 1.0 eq. ZnPPaM spectra from panel (a) shown. (d) SP2-ZnPPaM spectra at 0.2 and 1.0 eq. ZnPPaM. (e) Fluorescence emission spectra of ZnPPaM without protein present shows that fluorescence intensity is significantly lower for unbound ZnPPaM as compared to SP1-ZnPPaM and SP2-ZnPPaM shown in panels (c) and (d). (f) Quantum yield of ZnPPaM fluorescence emission as a function of ZnPPaM eq. per SP1 or SP2 protein monomer. (g) and (h) are the concentration profiles of SP1- and SP2-ZnPPaM fluorescence titrations, respectively. The concentration profiles were constructed by fitting the quantum yield vs. [ZnPPaM]/[protein monomer] plots in panel (f) to the binding model P + L → PL, where P is the protein monomer and L is the ZnPPaM ligand. The estimated dissociation constant of SP1-ZnPPaM is 660 nM, and that for SP2-ZnPPaM is 480 nM.**
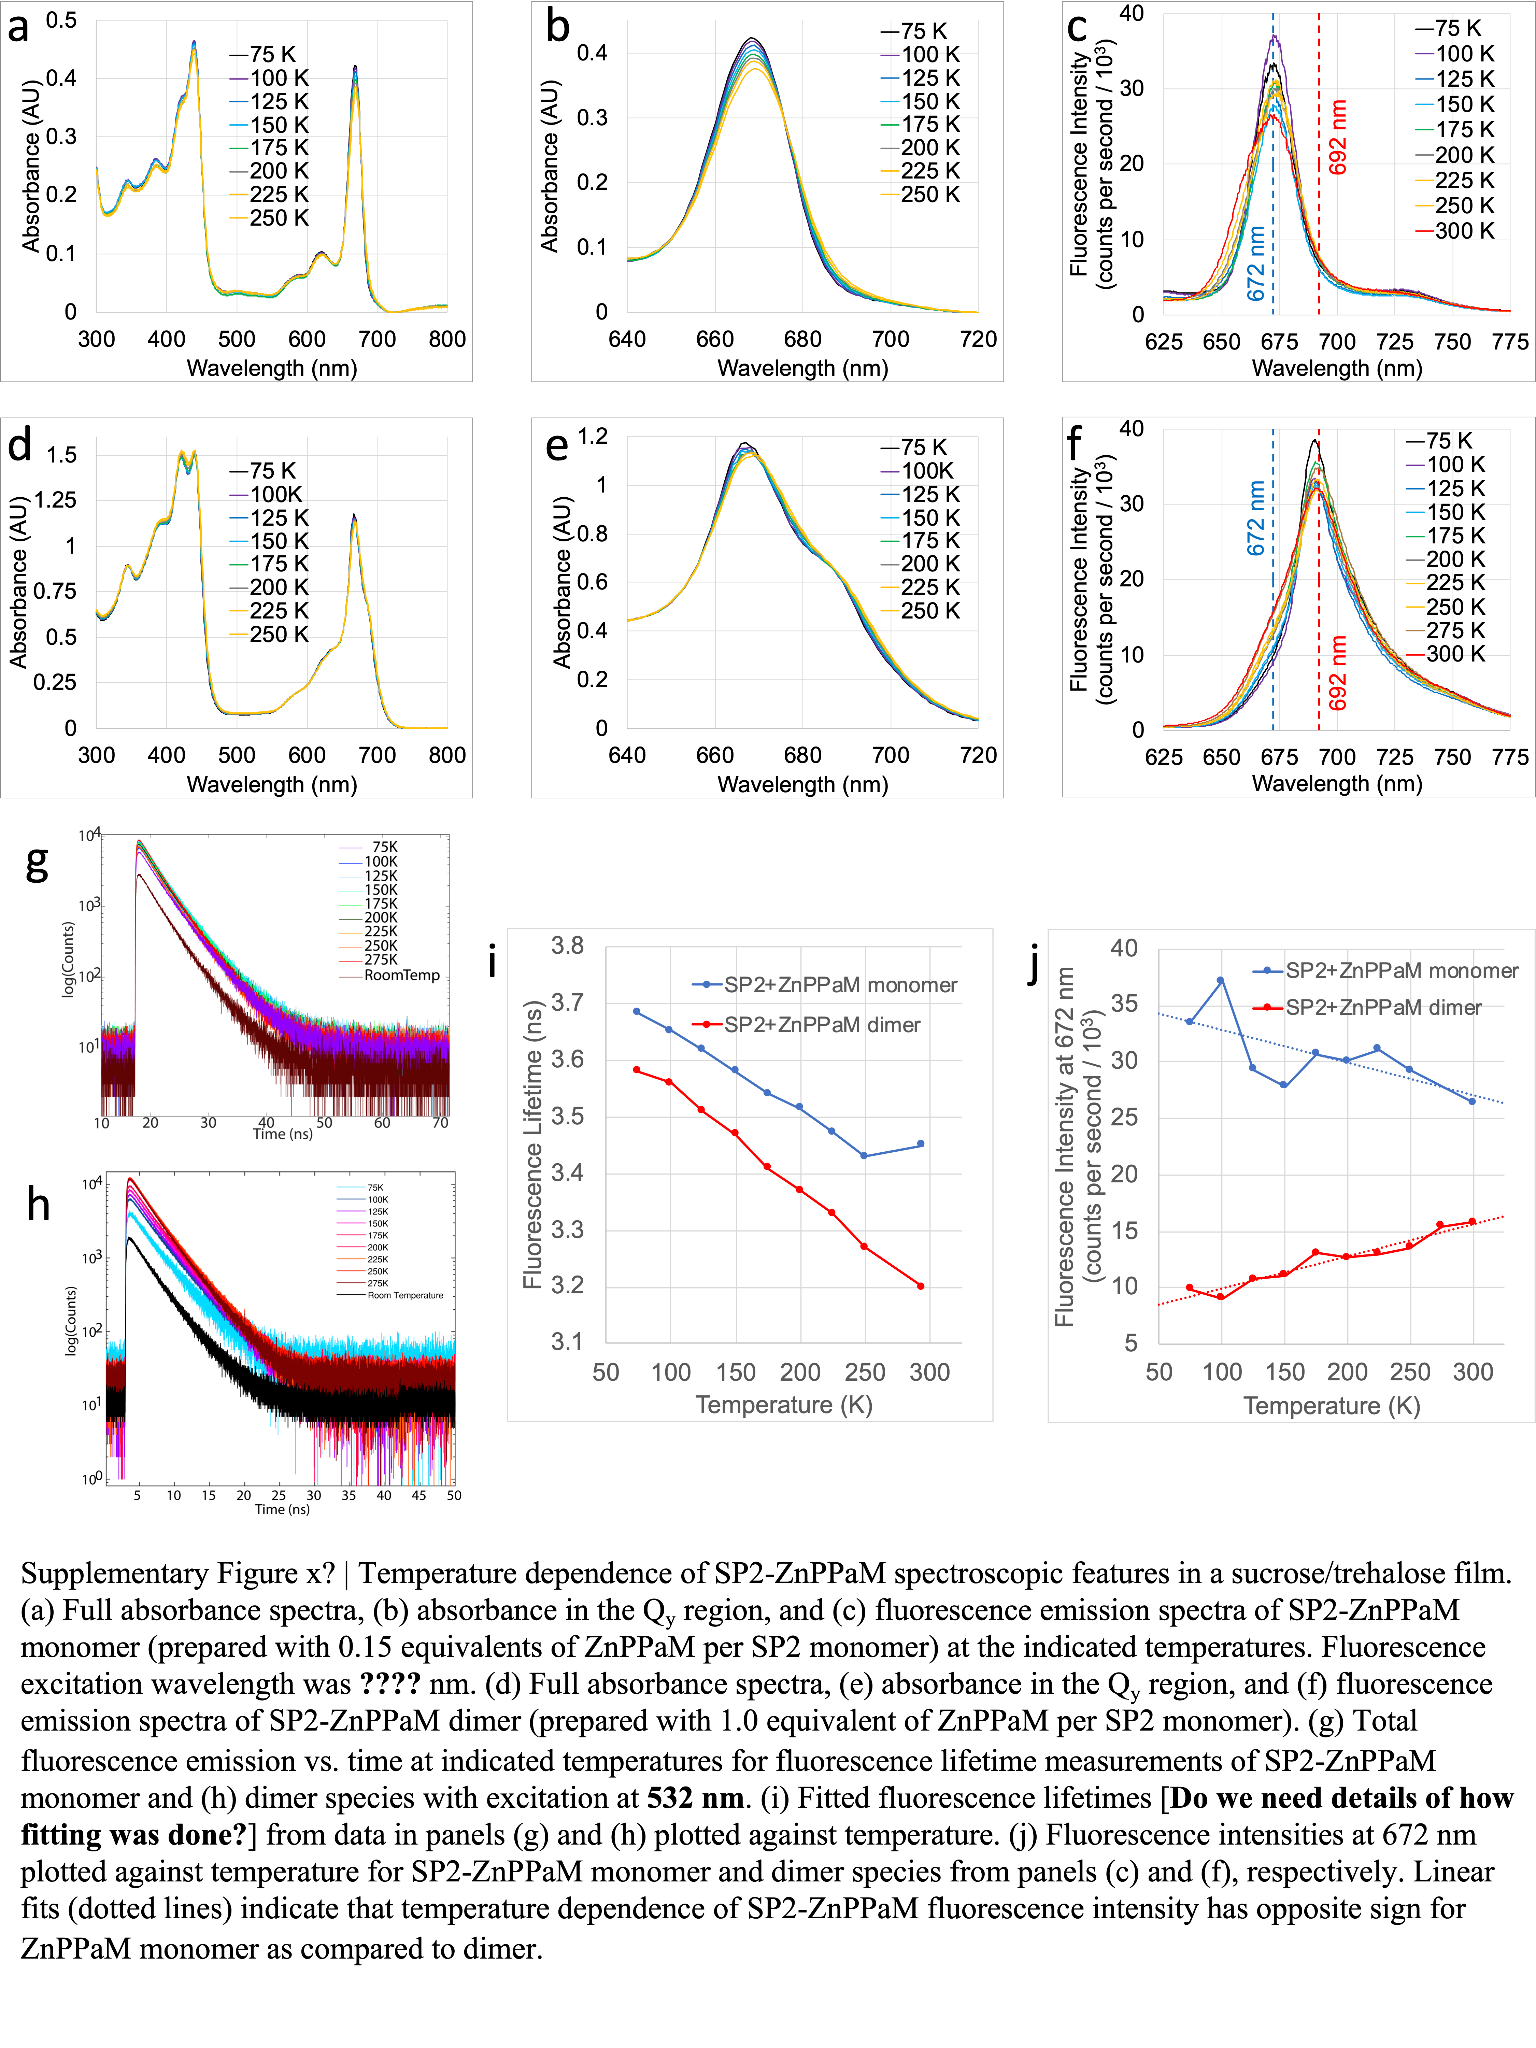
**

**Supplementary Figure 7 | Temperature dependence of SP2-ZnPPaM absorbance and fluorescence in a sucrose/trehalose film.** (a) Full absorbance spectra, (b) absorbance in the Qy region, and (c) fluorescence emission spectra of SP2-ZnPPaM monomer (prepared with 0.15 equivalents of ZnPPaM per SP2 protein monomer) at the indicated temperatures in sucrose/trehalose sugar matrix [(Caram et al. 2016)](https://paperpile.com/c/1ZjmK7/9vhZ) (see Methods for details). Fluorescence excitation wavelength was 405 nm. (d) Full absorbance, (e) Qy absorbance, and (f) fluorescence spectra of SP2-ZnPPaM dimer (prepared with 1.0 equivalent of ZnPPaM per SP2 protein monomer) in a sucrose/trehalose matrix. (g) Temperature dependent time correlated single photon counting (TCSPC) for SP2-ZnPPaM monomer and (h) SP2-ZnPPaM dimer. Excitation for TCSPC was 405 nm; the total fluorescent signal was collected after passing through a 420 nm long-pass filter to eliminate scattered laser light. (i) Fluorescence lifetimes of data in panels (g) and (h) fitted to mono-exponential decay and plotted against temperature. (j) Fluorescence intensities at 672 nm plotted against temperature for SP2-ZnPPaM monomer and dimer species from panels (c) and (f), respectively. Linear fits (dotted lines) indicate that temperature dependence of SP2-ZnPPaM fluorescence intensity has opposite sign for ZnPPaM monomer as compared to dimer.

**Molecular dynamics and circular dichroism spectra calculations**

We present here a more in-depth analysis of circular dichroism spectra calculations, together with molecular dynamics results.

The calculated spectra for SP1, using either the design model or the crystal structure, qualitatively match the experimental one. That is, the signs of the Cotton effects in the Qy and Soret regions are both well reproduced (Supplementary Figure 8, cf. Figure 2 in the main manuscript). There is a slight discrepancy in the Qy region, where calculations predict a conservative signal. The asymmetry in the experimental spectrum could be ascribed to a shielding effect from the protein environment (not explicitly considered in the calculations; see Methods for details). This shielding commonly decreases the effective electronic coupling [(Curutchet et al. 2011; Adolphs and Renger 2006; Renger and Müh 2012)](https://paperpile.com/c/1ZjmK7/Bhah+s32e+fbXe) and, indeed, calculations where the couplings are scaled down reproduce the asymmetric feature in the Qy region (Supplementary Figure 9). Without scaling, the calculated excitonic couplings between the Qy states are 41 and 87 cm-1 for the design and crystal structures, respectively. A quantitative treatment of CD intensities likely requires a higher level of theory [(Seibt, Lindorfer, and Renger 2022)](https://paperpile.com/c/1ZjmK7/ysdO).

We also performed molecular dynamics simulations and tracked the chromophore dimer geometry, by monitoring the angle formed by the vectors that connect the NB and ND nitrogen atoms (these are approximately parallel to the Qy transition dipole moments) [(Georgakopoulou et al. 2002)](https://paperpile.com/c/1ZjmK7/DCGF). The SP1 protein shows a very robust dimer geometry, with an angle between these vectors that is constant across 1.25 μs (Supplementary Figure 10) and is similar to the one from both the design and the crystal structure (137°). The distance between the metallic centers is stable as well, with an average value of 0.76 nm, similar to the 0.78 nm distance between Zn atoms in the crystal structure.

In the case of the SP2 crystal structure, calculations predict a strong excitonic coupling of 241 cm-1, and an oscillator strength redistribution towards the high-energy exciton component (Supplementary Figure 11) that explains the low intensity red shoulder in the experimental absorption spectrum. The CD calculations on the SP2 crystal structure geometry reproduce the Cotton effect sign in the Qy region, but not in the Soret (Supplementary Figure 8). Although the latter is more complicated due to the overlap of several transitions, the discrepancy could suggest slight rearrangements in the solution structure with respect to that of the crystal. On the other hand, the theoretical CD spectrum of the Chl dimer from the design model (which was shown to be incorrect by X-ray crystallography) had the sign of its Qy Cotton effect inverted and had a different pattern in the Soret region (Supplementary Figure 8).

In addition, molecular dynamics simulations show a less stable dimer geometry for SP2 (Supplementary Figure 10), with a fluctuating relative orientation and an increased Zn – Zn distance consistent with the cavity expansion observed upon binding for this protein. An interesting observation is that simulations starting from the design structure undergo a change in dimer geometry, which brings the orientation and Zn – Zn distance closer to those of the crystal structure. This highlights the potential of molecular dynamics tools as a complement to protein design software [(Barros et al. 2019)](https://paperpile.com/c/1ZjmK7/meho).

Given the lack of a crystal structure for the SP3 protein in its holo state, we only performed CD calculations on the design model. As described in the main manuscript, the calculation reproduces the experimental features very well (Supplementary Figure 8), and yields an excitonic coupling value of 22 cm-1. Considering the results for SP1 and SP2, the good spectral agreement can be taken as a confirmation that the dimer adopts the designed geometry.


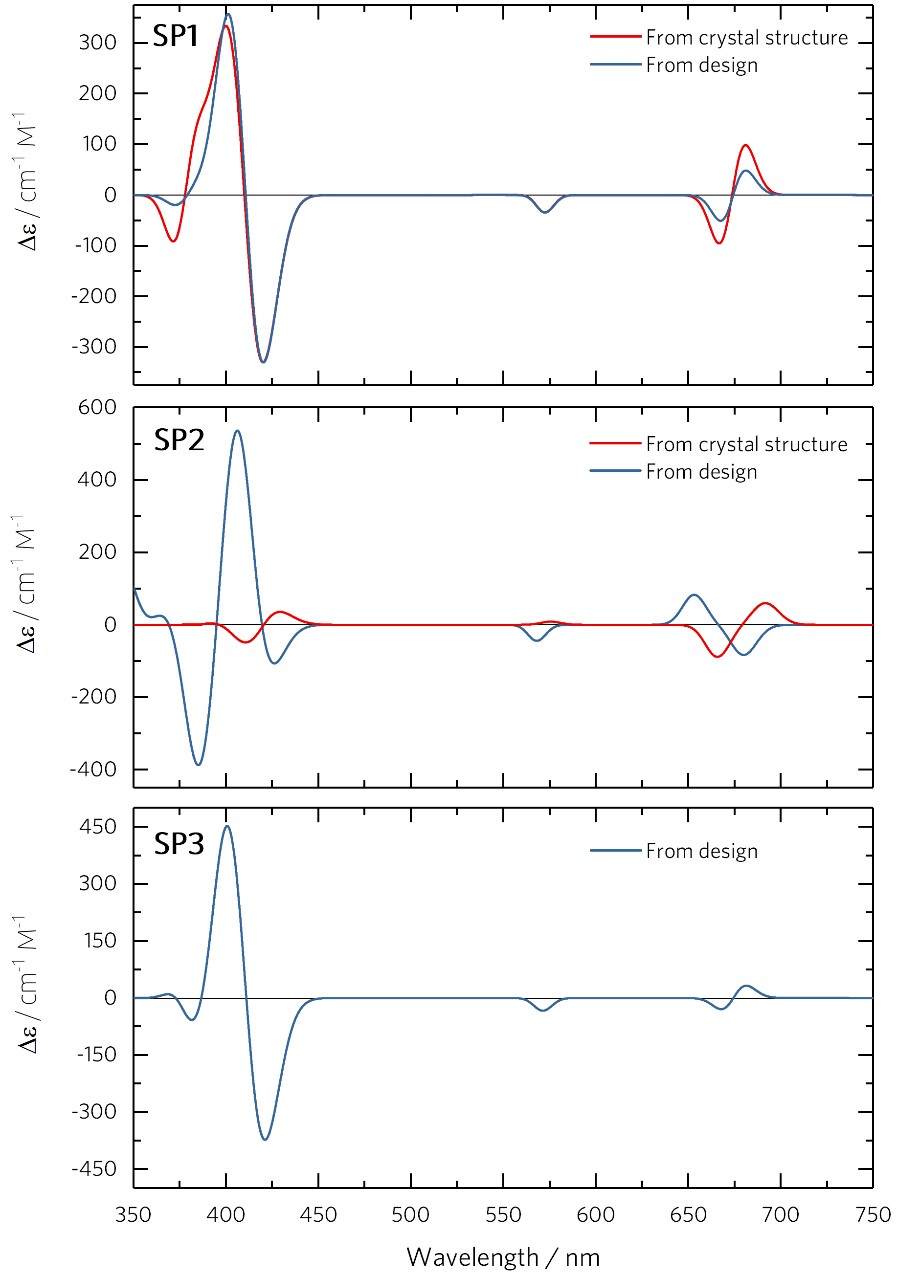


**Supplementary Figure 8 | Calculated circular dichroism spectra, using either crystal structure or design geometries, for the SP1, SP2, and SP3 proteins with ZnPPaM dimer bound.**


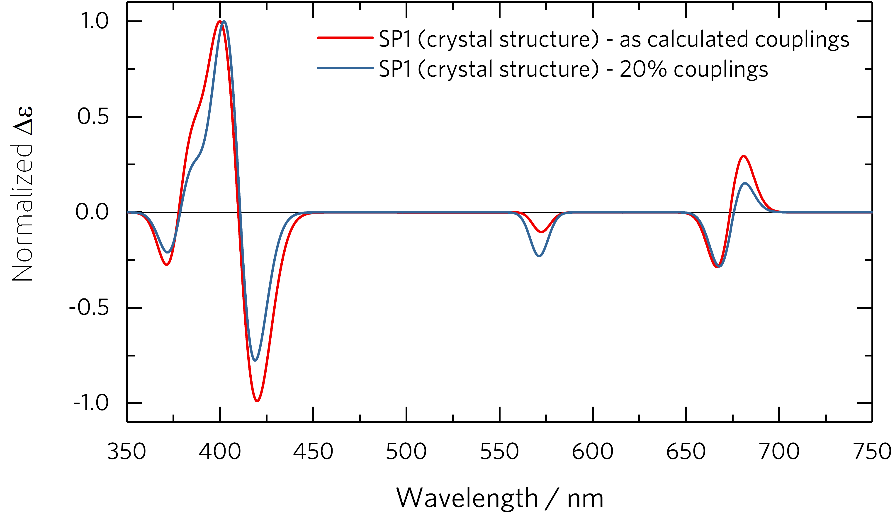


**Supplementary Figure 9 | Calculated circular dichroism spectra for SP1-ZnPPaM using the crystal structure geometry (PDB ID: 7UNJ), and either full excitonic couplings, or scaled down to 20%.**


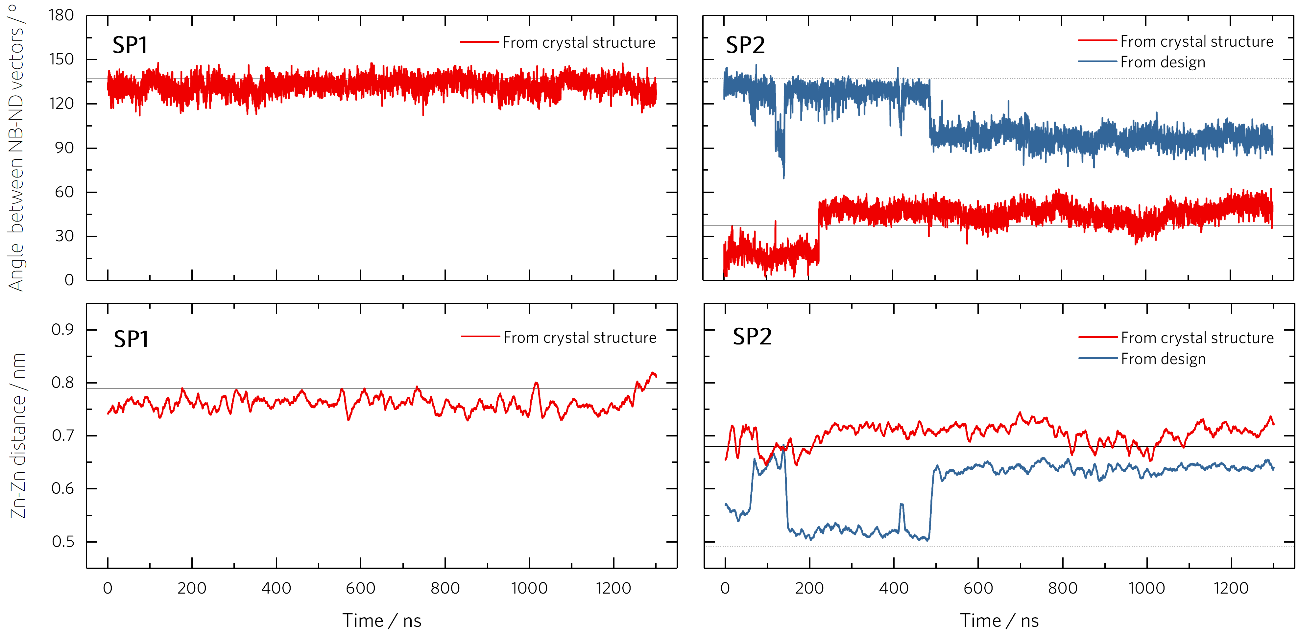


**Supplementary Figure 10 | Structural parameters from molecular dynamics simulations on the SP1 (left) and SP2 (right) proteins, across 1.25 μs runs.** Top plots show the angle between the vectors that connect NB and ND nitrogen atoms in the chromophores, while bottom plots display the inter-chromophore distance expressed as the distance between their Zn atoms (50 points moving average). Horizontal solid lines show the values from the crystal structures, while dashed lines show the respective values from designs. Simulations were performed using either crystal structures or designed structures as initial points, as specified in the legends. Additional 0.5 μs replicas produced comparable results (data not shown).


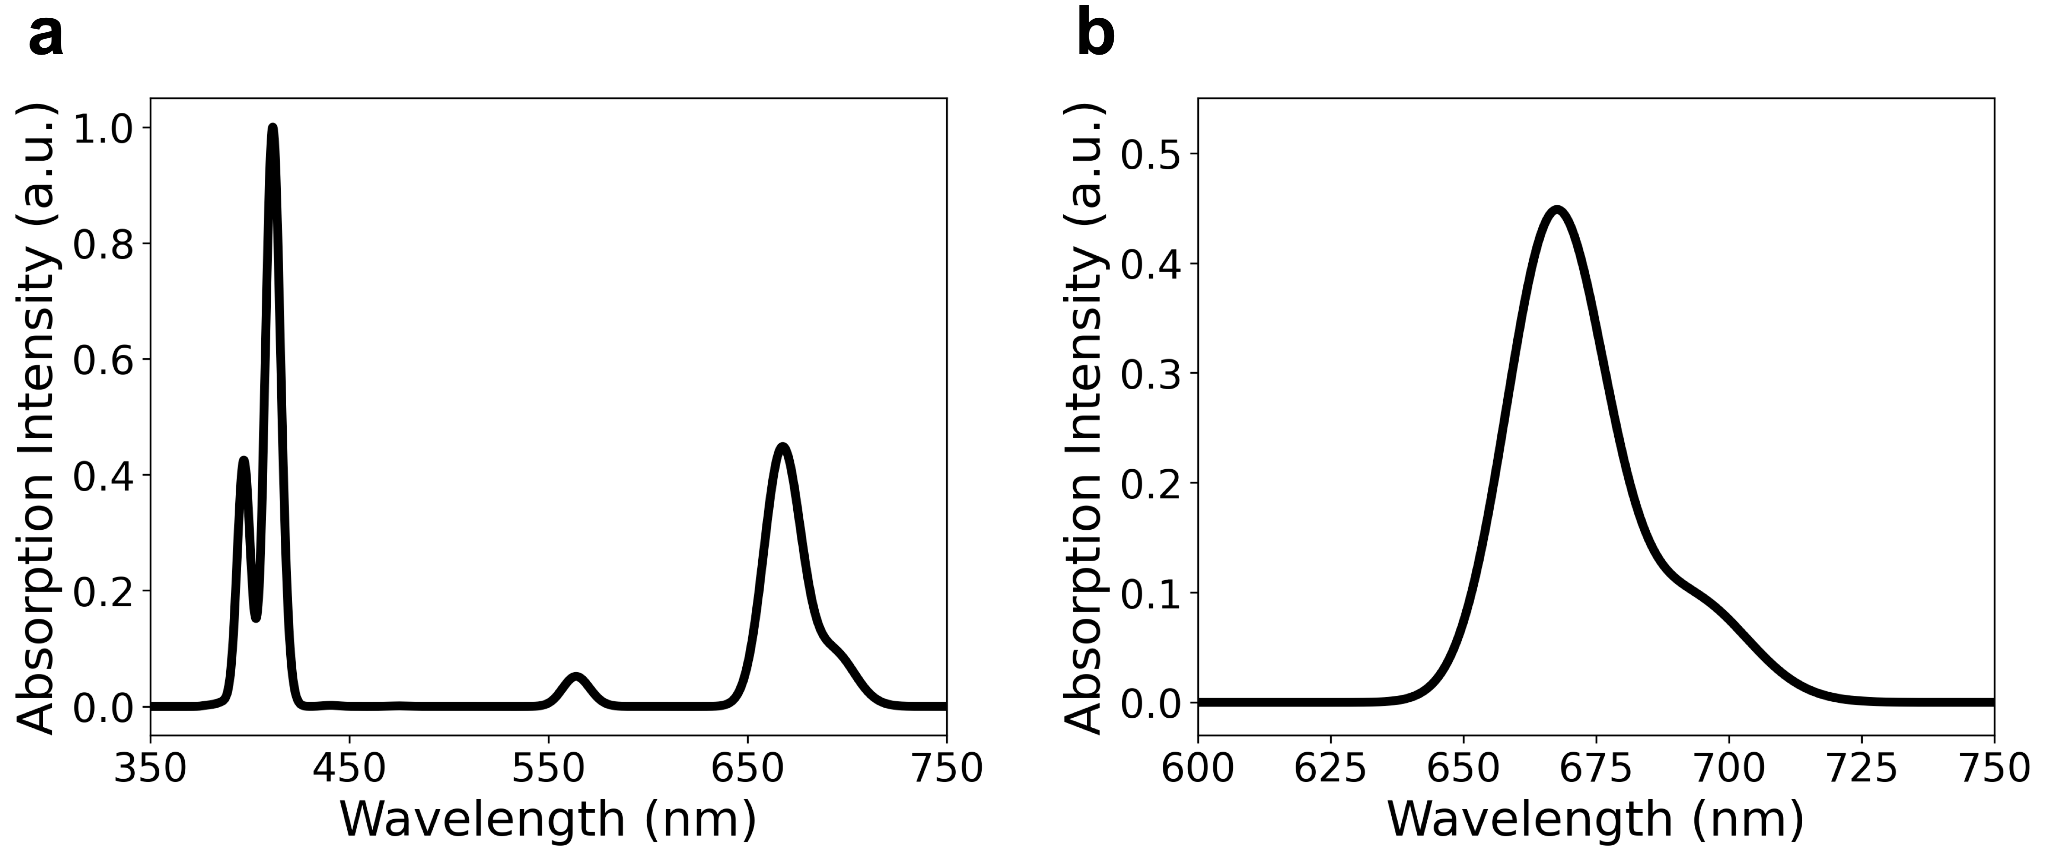


**Supplementary Figure 11 | Calculated absorbance spectra for SP2-ZnPPaM using the crystal structure geometry.** (a) Calculated full UV/vis absorbance spectrum and (b) close-up of Qy region, based on the SP2-ZnPPaM crystal structure (PDB ID: 7UNI). The calculated oscillator strength redistribution towards the high-energy exciton component in the Qy region, which creates a stronger ~668 nm feature and a weaker ~690 nm band, is in agreement with the experimental SP2-ZnPPaM dimer absorbance spectrum as shown in the main text in Figure 4a.


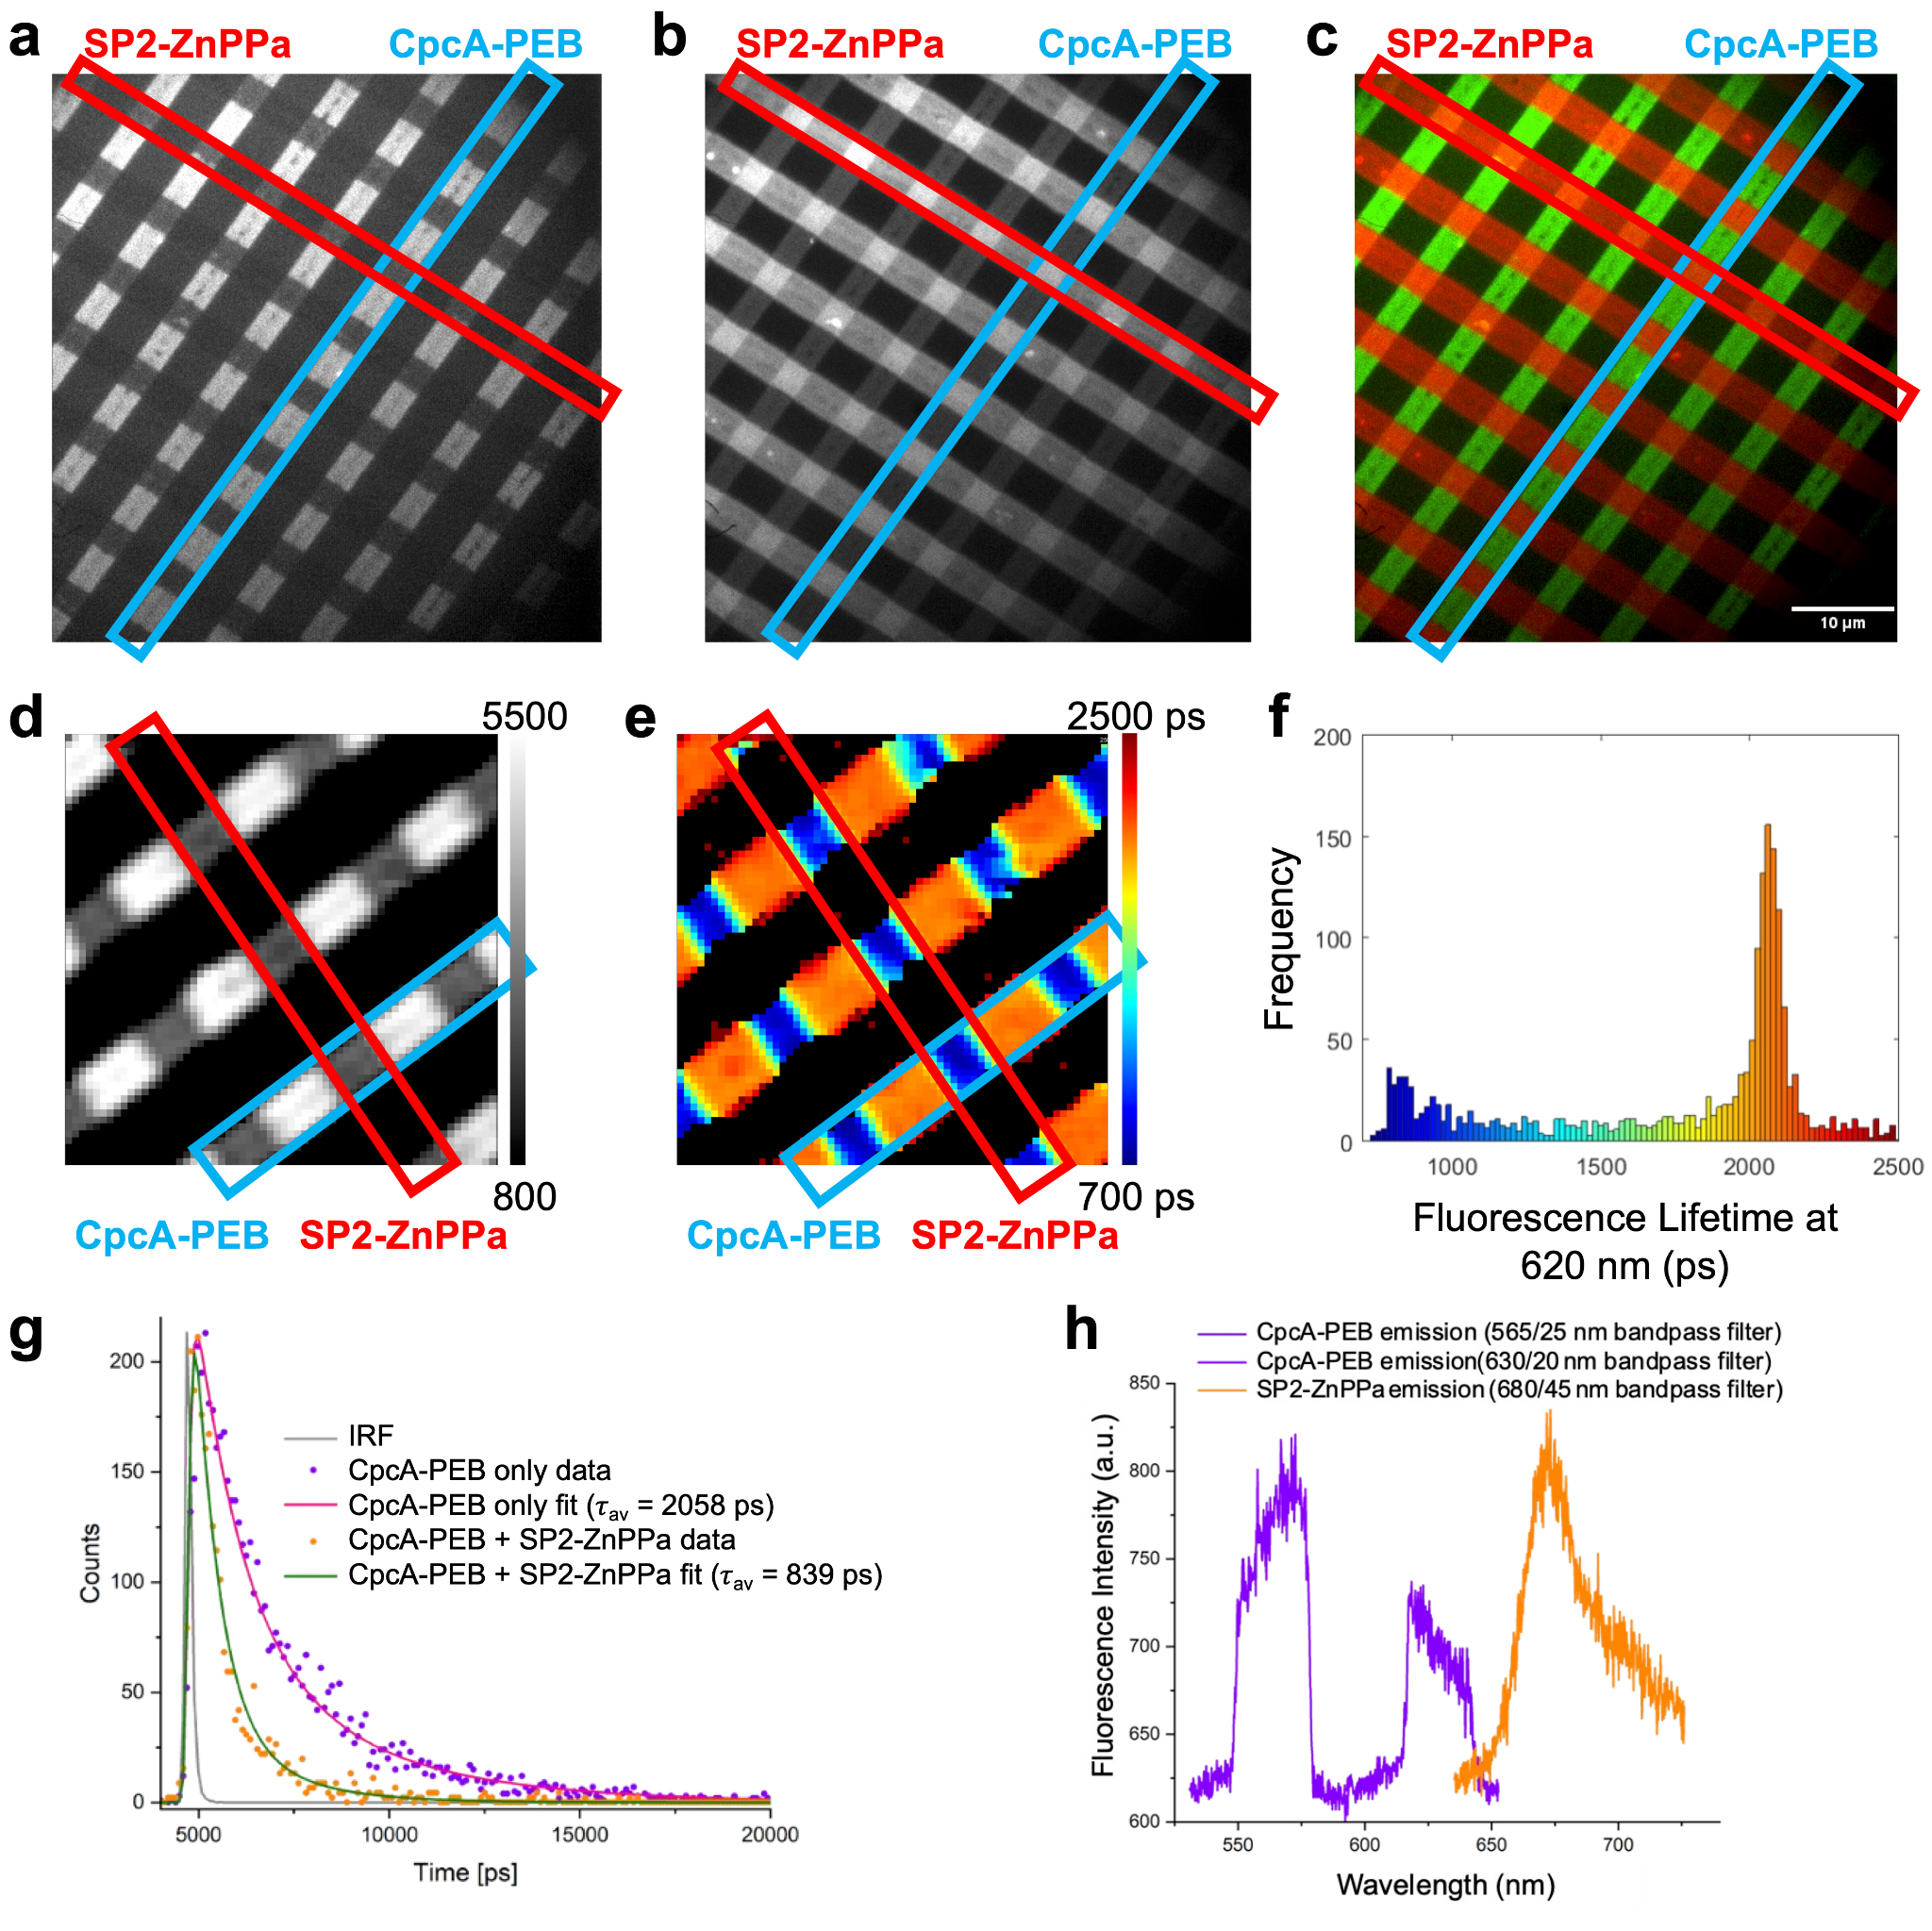


**Supplementary Figure 12 | Energy transfer activity of designed special pair protein SP2 on a glass surface.** Parallel lines (~5 μm-wide) of CpcA protein with bound phycoerythrobilin (PEB) were printed onto a glass surface by contact printing [(Huang, Vasilev, and Hunter 2020)](https://paperpile.com/c/1ZjmK7/Y3Ky). Lines of SP2-ZnPPa were printed perpendicular to and on top of the CpcA-PEB lines. (a) Image of proteins printed on functionalized glass showing total intensity of 620 nm emission. One of the CpcA-PEB lines is encapsulated by a blue box, and one line of SP2-ZnPPa is encapsulated by a red box. As expected, CpcA-PEB emits strongly at 620 nm, but SP2-ZnPPa does not. In locations where SP2-ZnPPa is printed on top of CpcA-PEB, 620 nm emission is significantly reduced. (b) The same substrate imaged at 680 nm, where SP2-ZnPPa emits, shows increased emission at 680 nm at locations where both CpcA-PEB and SP2-ZnPPa are present. (c) False color image showing 620 nm emission from panel (a) in green overlaid with 680 nm emission from panel (b) in red. (d) Total fluorescence emission at 620 nm similar to panel (a) with intensity indicated at right in arbitrary units. (e) Fluorescence lifetime map at 620 nm of same substrate region shown in panel (d) shows that SP2-ZnPPa shortens the fluorescence lifetime of CpcA-PEB. (f) A histogram of the amplitude-averaged lifetime showing a clear bimodal distribution, with peaks corresponding to the fluorescence lifetime values associated with the quenched and unquenched CpcA-PEB donor molecules. (g) Bi-exponentiial fits of representative fluorescence lifetime data. IRF is the instrument response function. Experimental data are shown as data points, and lines represent mono-exponential fits. Using *E*=1-(τDA/τD), where *E* is efficiency, τD is the fluorescence lifetime of the donor chromophore, and τDA is the lifetime of the donor in the presence of the acceptor, we find an energy transfer efficiency of 59%. (h) Fluorescence spectra of CpcA-PEB and SP2-ZnPPa when bandpass filters are applied as in data shown in panels (a) through (g).


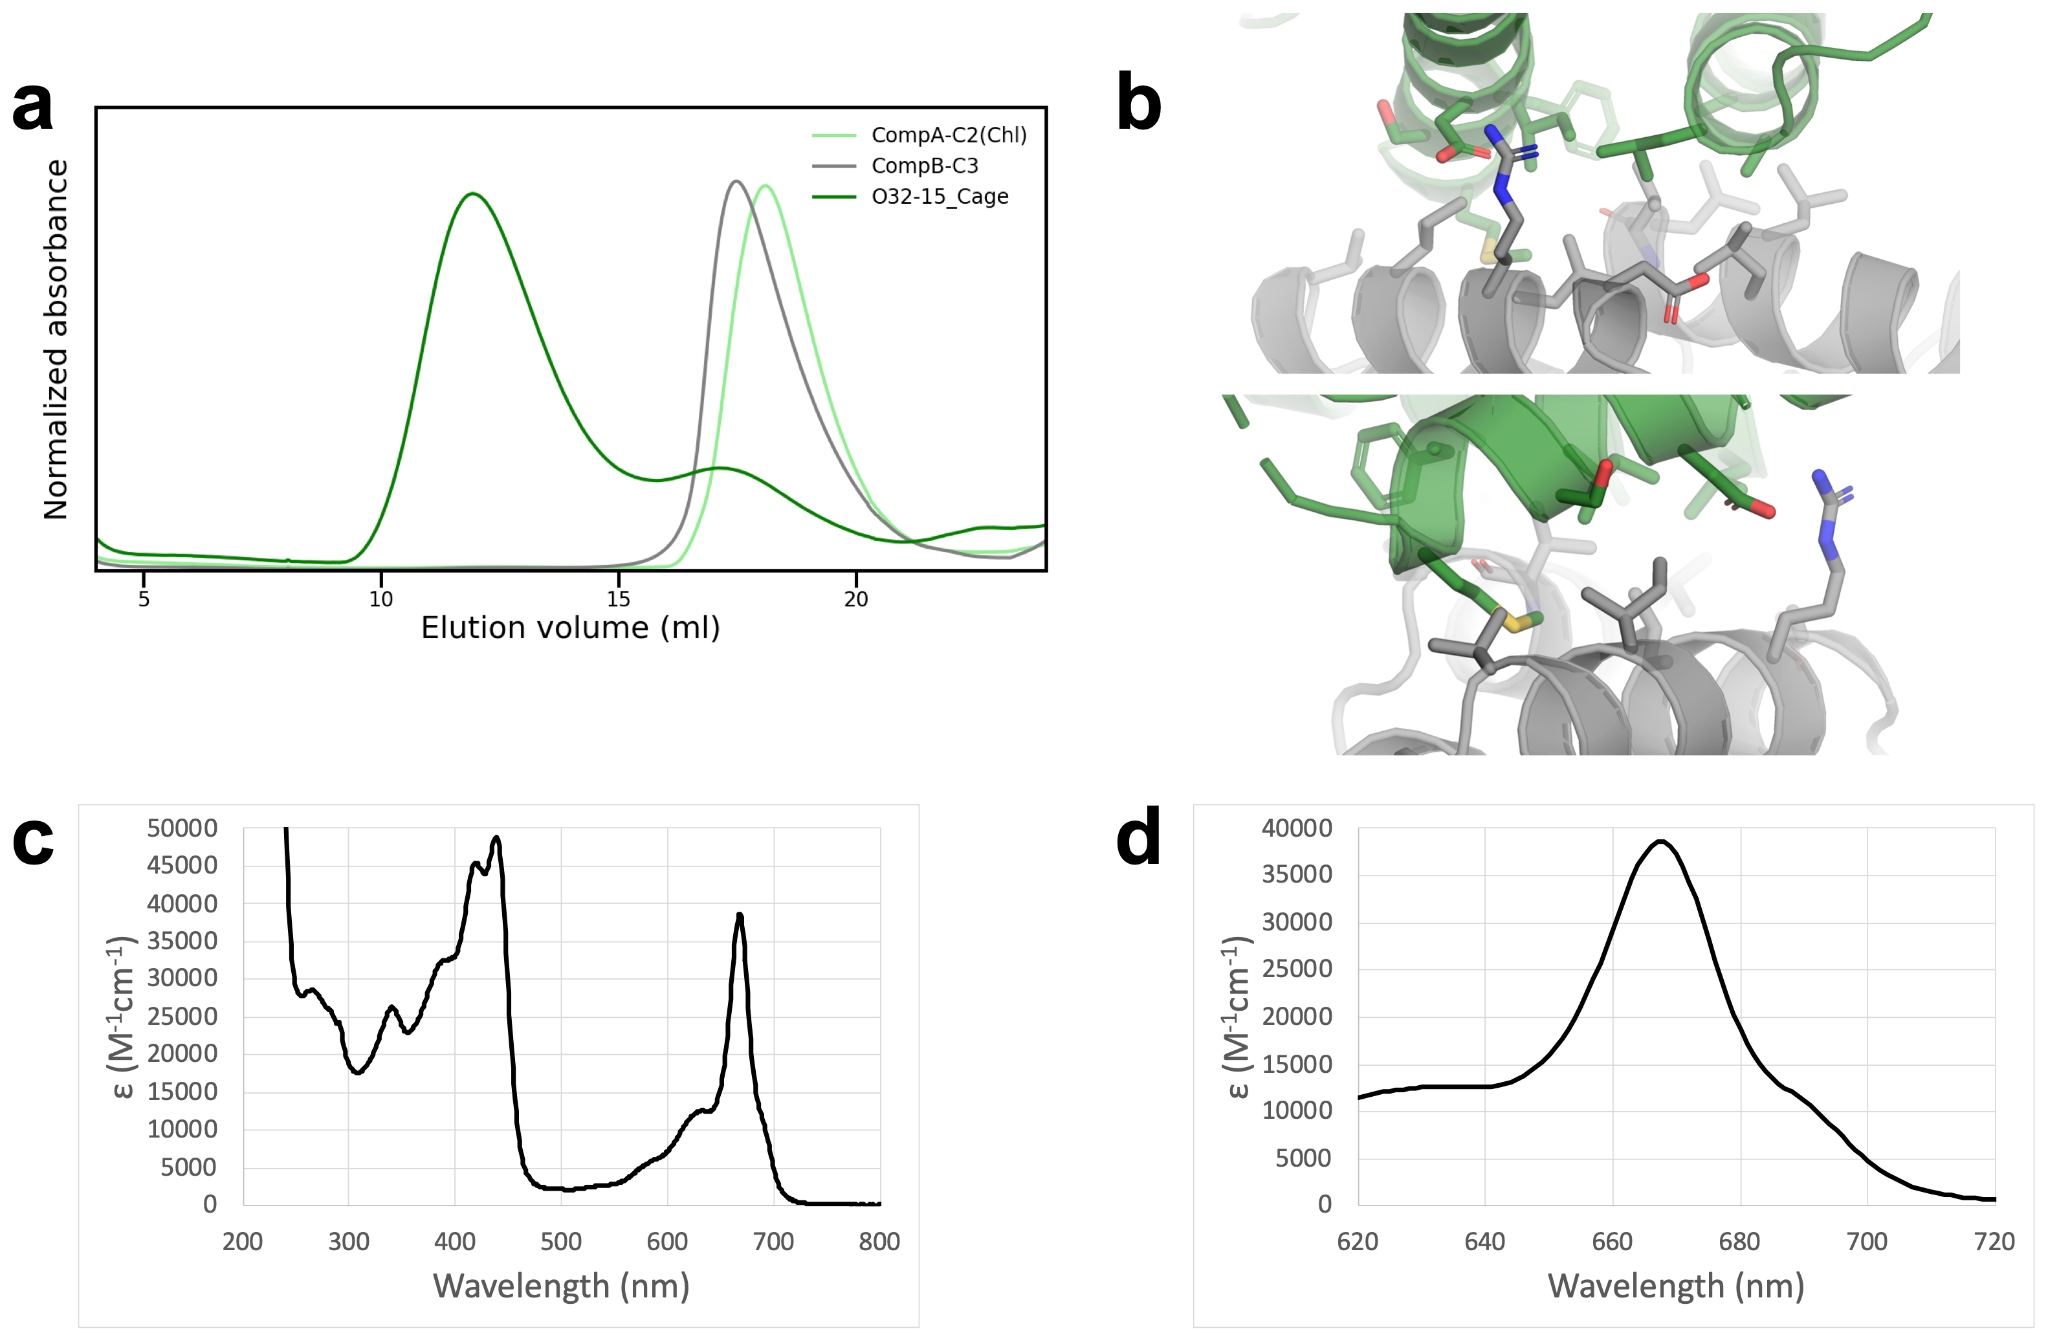


**Supplementary Figure 13 | Design and characterization of chlorophyll-binding O32-15 nanocage.** (a) Size exclusion chromatography (SEC) chromatogram shows octahedral nanocage (green trace) elutes at the volume expected for the target 2-component cage (48-subunit) on a Superose 6 Increase 10/300 gel filtration column (Cytiva). The O32-15 cage was assembled in vitro by stoichiometric mixture of the individually produced and purified designed components: chlorophyll dimer (O32-15A, light green) and trimeric component (O32-15B, grey), respectively. (b) Two views of the design model of the cage interface within the two-component O32-15 chlorophyll binding cage. (c) UV/vis absorbance spectrum and (d) closeup of Qy region of octahedral nanocage with chlorophyll bound after PD-10 column and sterile filtration. The spectrum includes a shoulder on the Qy absorbance band at 692 nm, similar to SP2. The sample was prepared by adding a 1.8-fold excess of ZnPPaM (32 μM) to 2.5 mL of 17.6 μM nanocage (Chl binding site concentration) in 150 mM NaCl, 10 mM Tris at pH 8, and 0.3% w/v 3-((3-cholamidopropyl) dimethylammonio)-1-propanesulfonate (CHAPS) detergent. Sample was purified by PD-10 column to remove excess ZnPPaM and sterile filtered with a 0.22 μm syringe filter prior to collecting the absorbance spectrum shown.


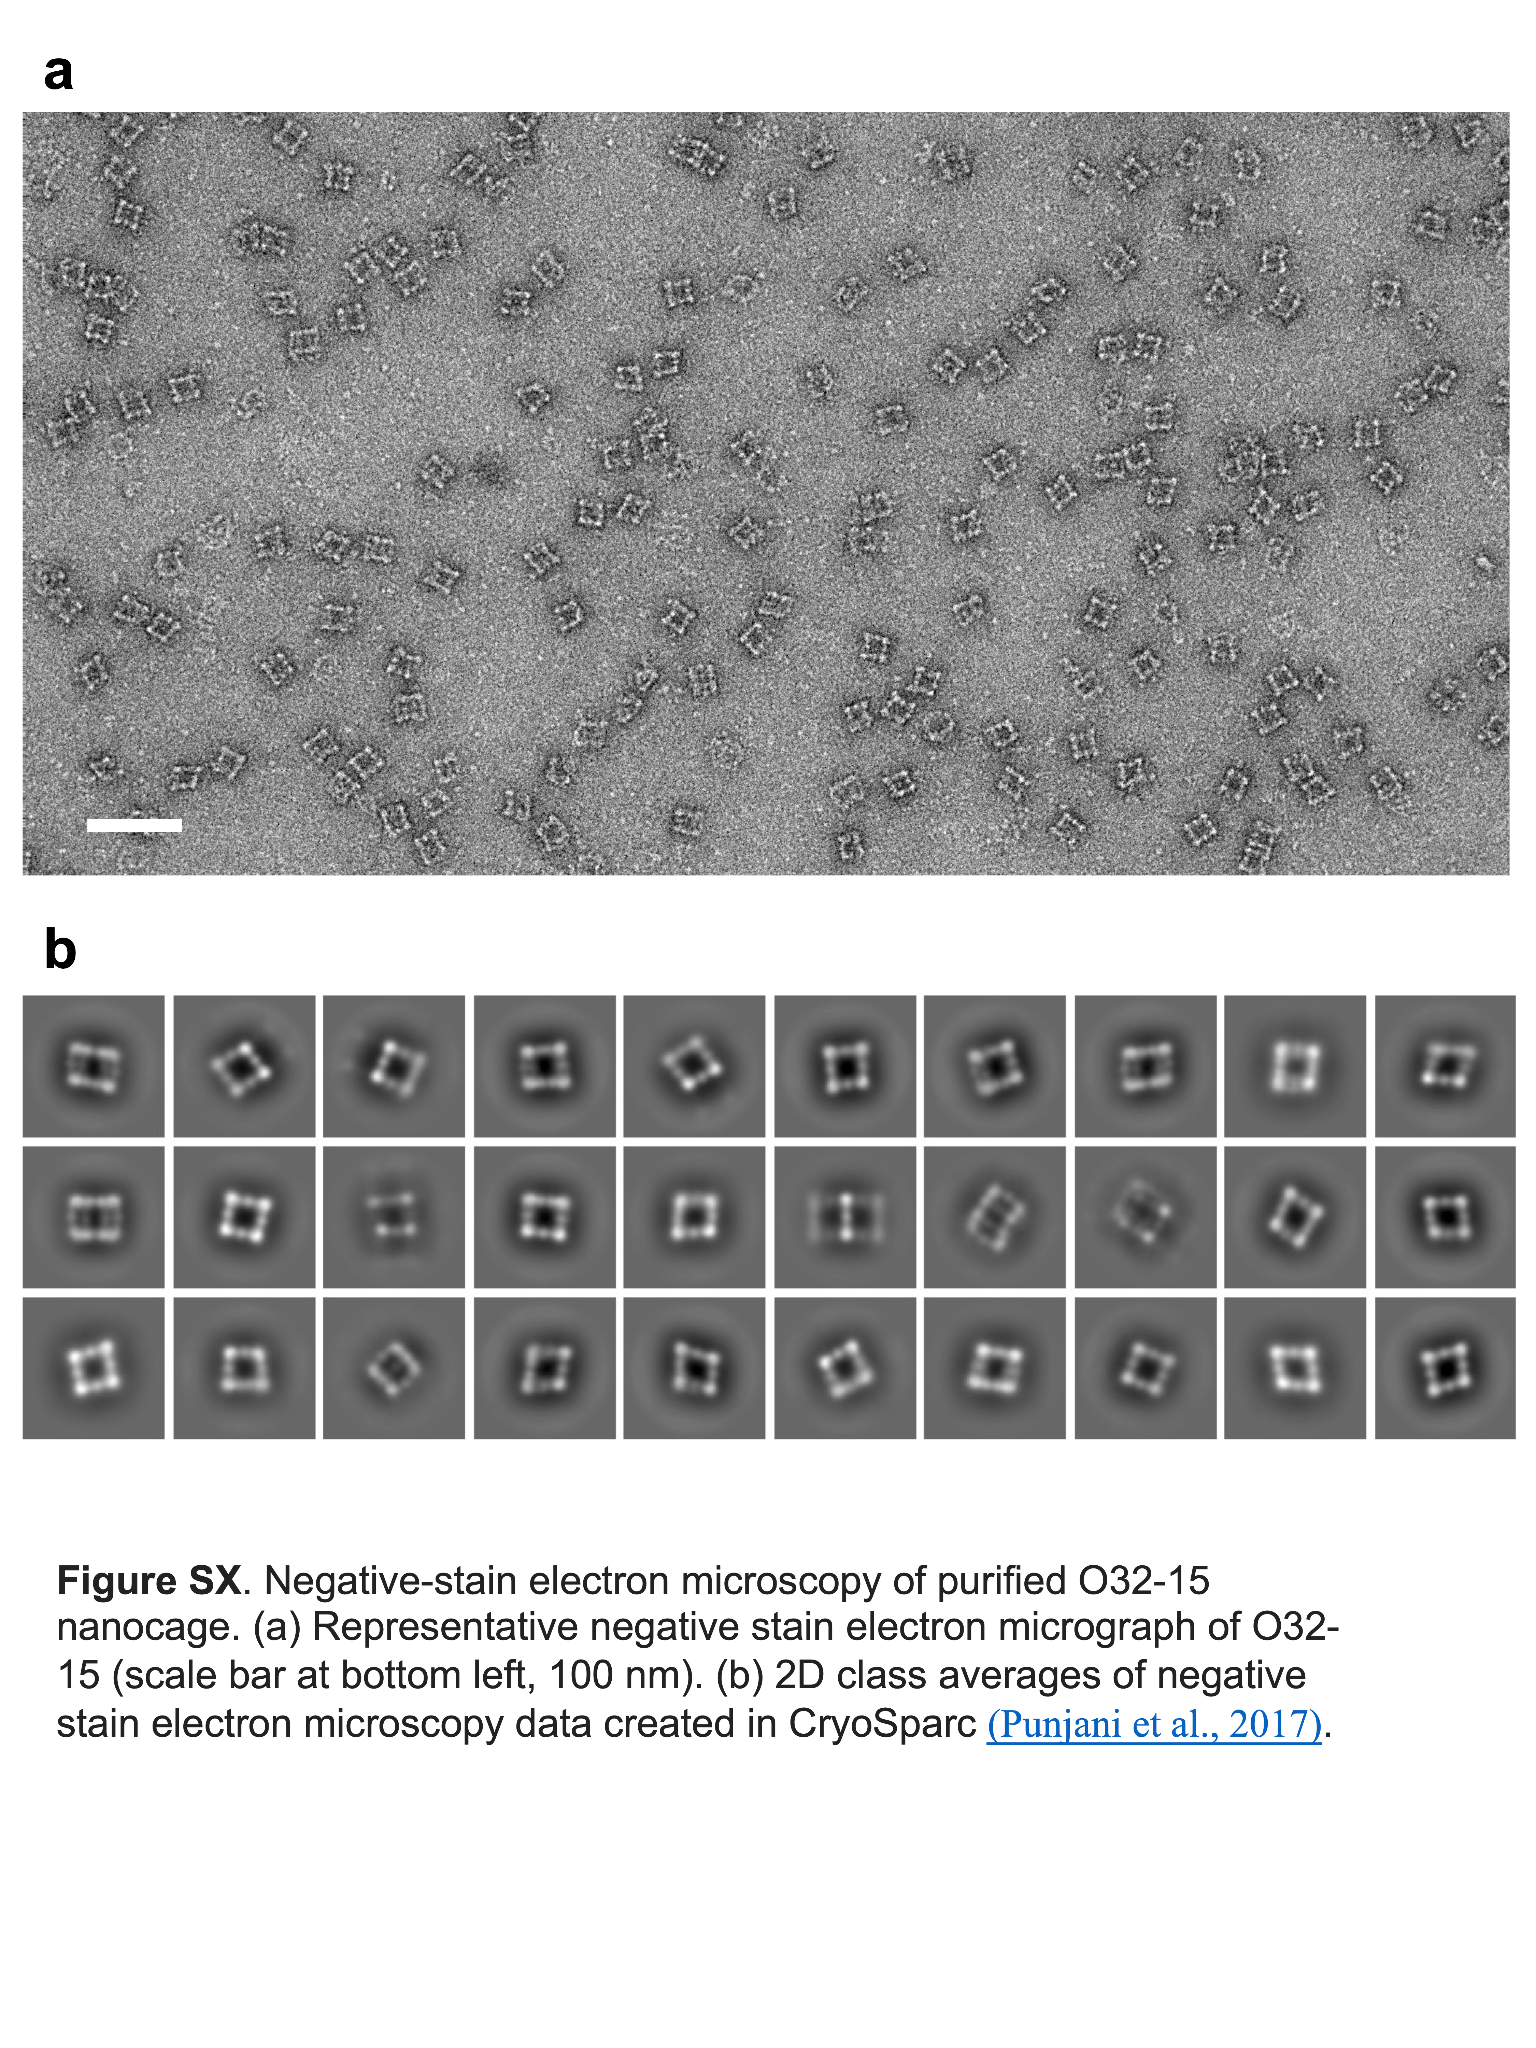


**Supplementary Figure 14 | Negative-stain electron microscopy of purified O32-15 nanocage.** (a) Representative negative stain electron micrograph of O32-15 (scale bar at bottom left, 100 nm). (b) 2D class averages of negative stain electron microscopy data created in CryoSparc [(Punjani et al. 2017)](https://paperpile.com/c/1ZjmK7/cHz4u).


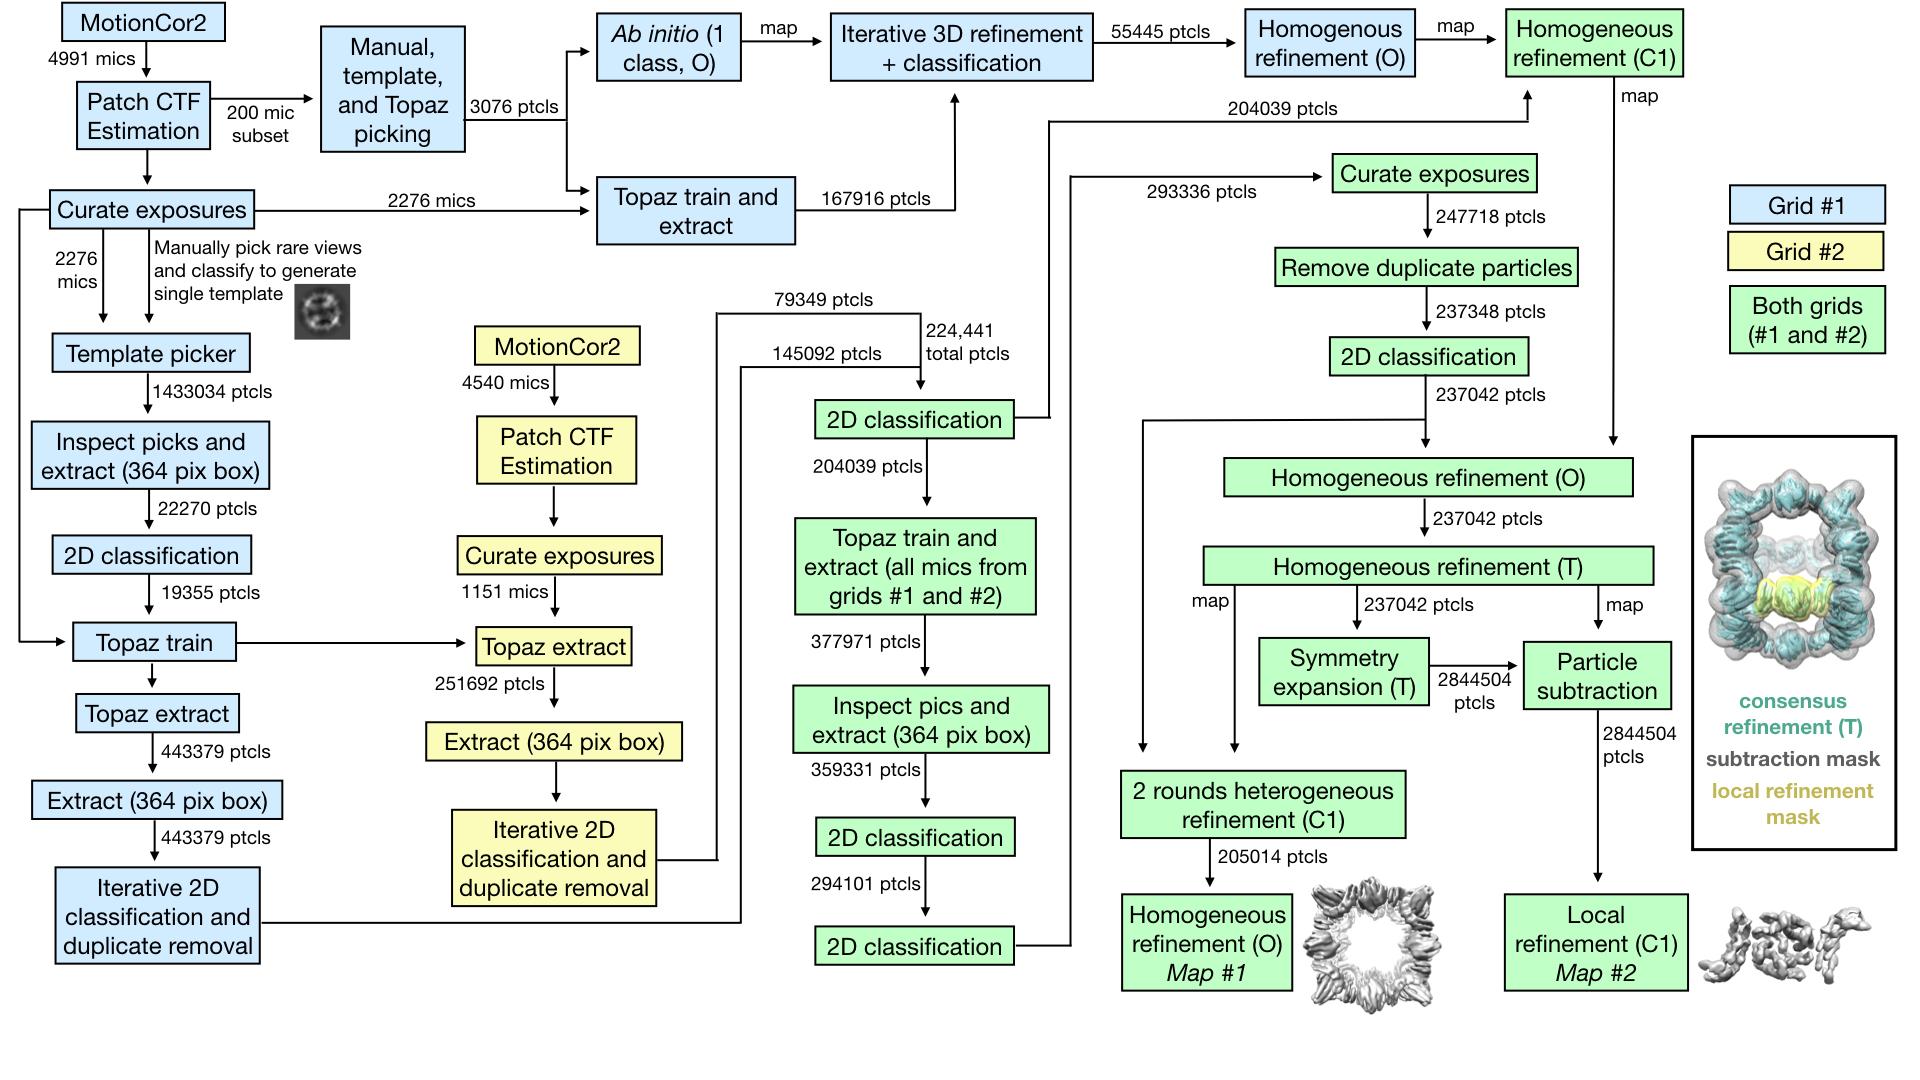


**Supplementary Figure 15 | Cryo-EM data processing workflow for ZnPPaM-loaded nanocage.**


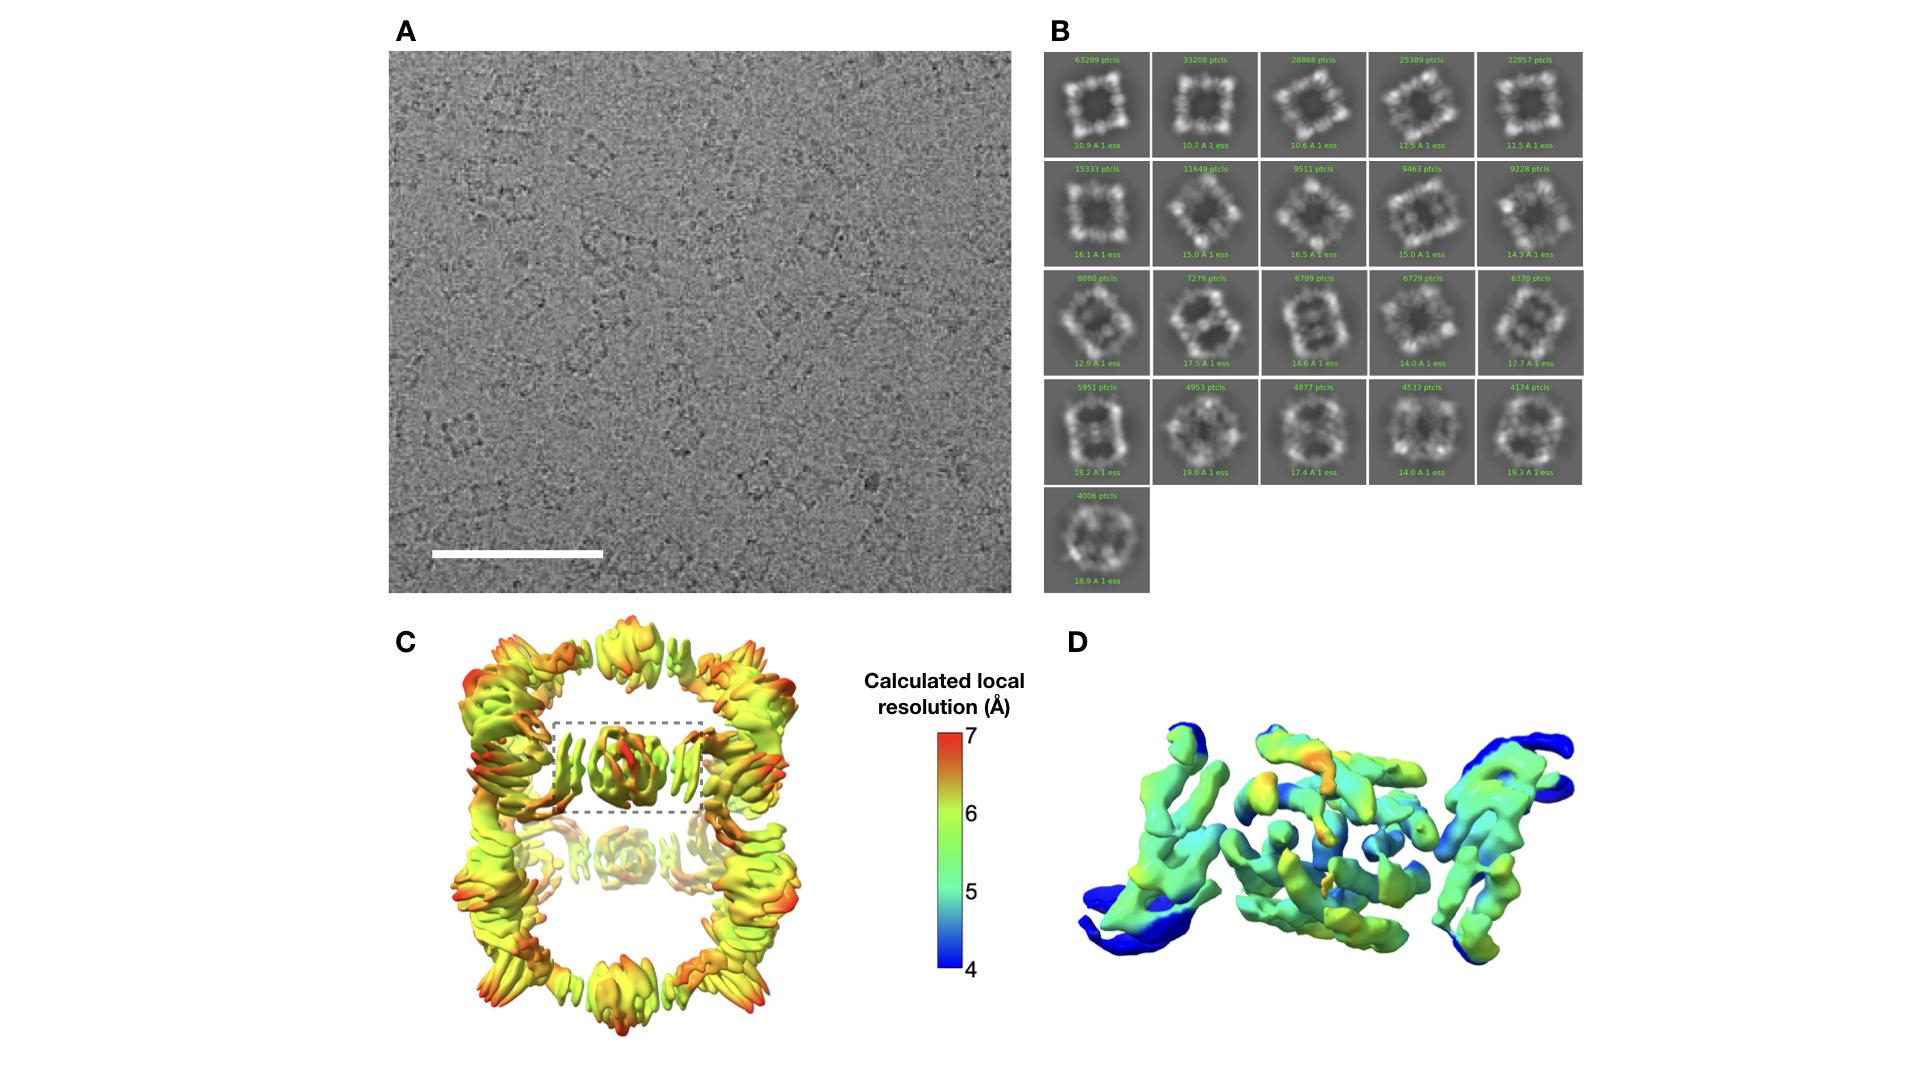


**Supplementary Figure 16 | Cryo-EM of ZnPPaM-bound nanocage.** (A) Representative micrograph; scale bar = 100 nm. (B) 2D averages of curated particle set (all classes containing at least 250 particles). (C) Cryo-EM maps of full nanocage and (D) ligand-binding region, colored by local resolution in Å, as calculated in Cryosparc. The region of the cage corresponding to the map in (D) is marked with a dashed rectangle in (C).

| **a**  **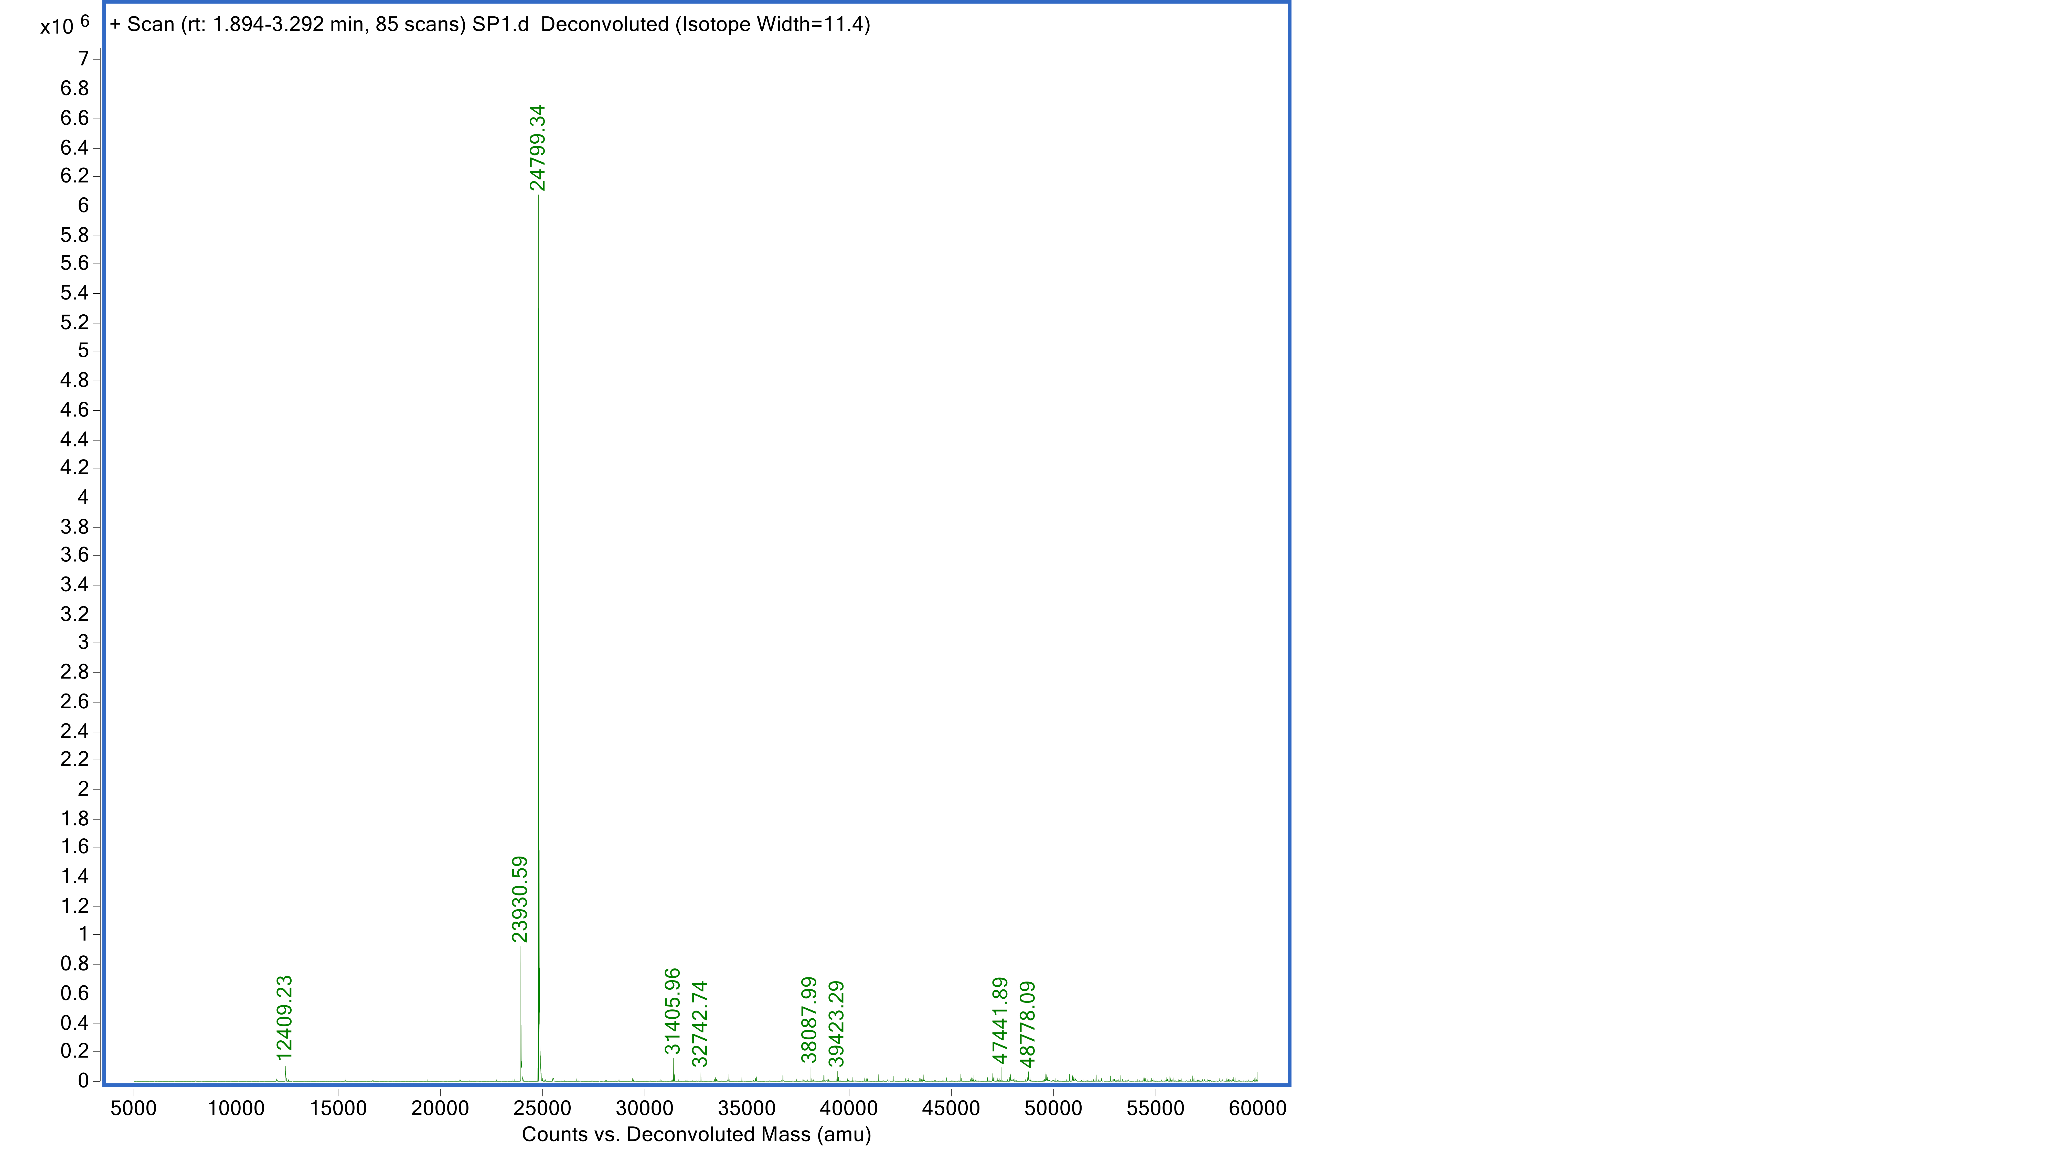** |
| --- |
| **b**  **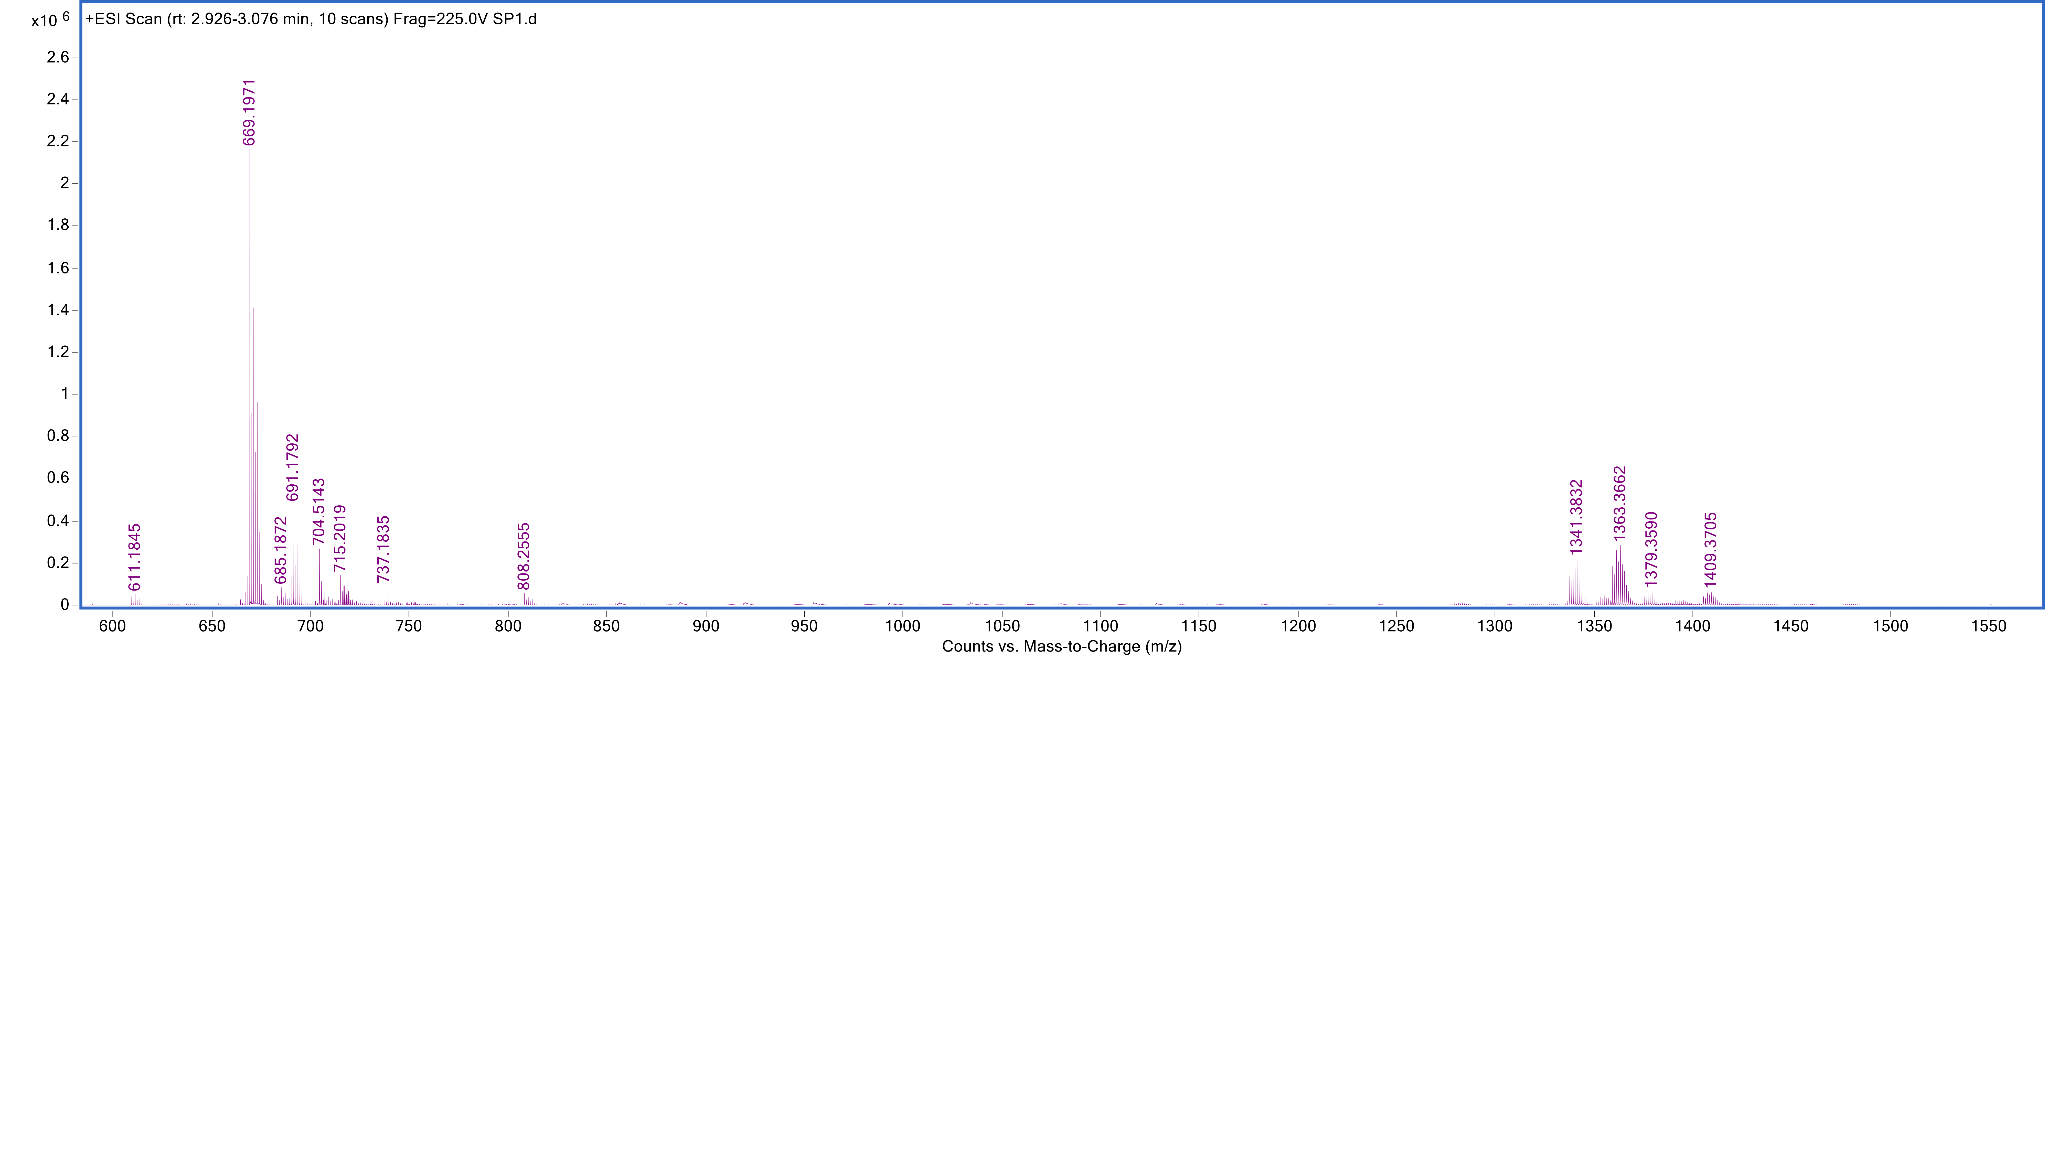** |
| **Supplementary Figure 17 | Reverse-phase liquid chromatography/mass spectrometry of SP1-ZnPPaM verifies molecular weights of protein and pigment.** (a) The dominant protein peak registers a molecular weight of 24799.3 Da; the expected protein molecular weight after cleavage by TEV protease is 24799.5 Da. (b) Mass spectrum of the same sample in the low-molecular weight range shows that ZnPPaM is present. The dominant peak at 669.2 Da is consistent with the expected molecular weight of 670.1 Da. Mass spectra were recorded after collecting CD and UV/vis spectra. |

| **a**  **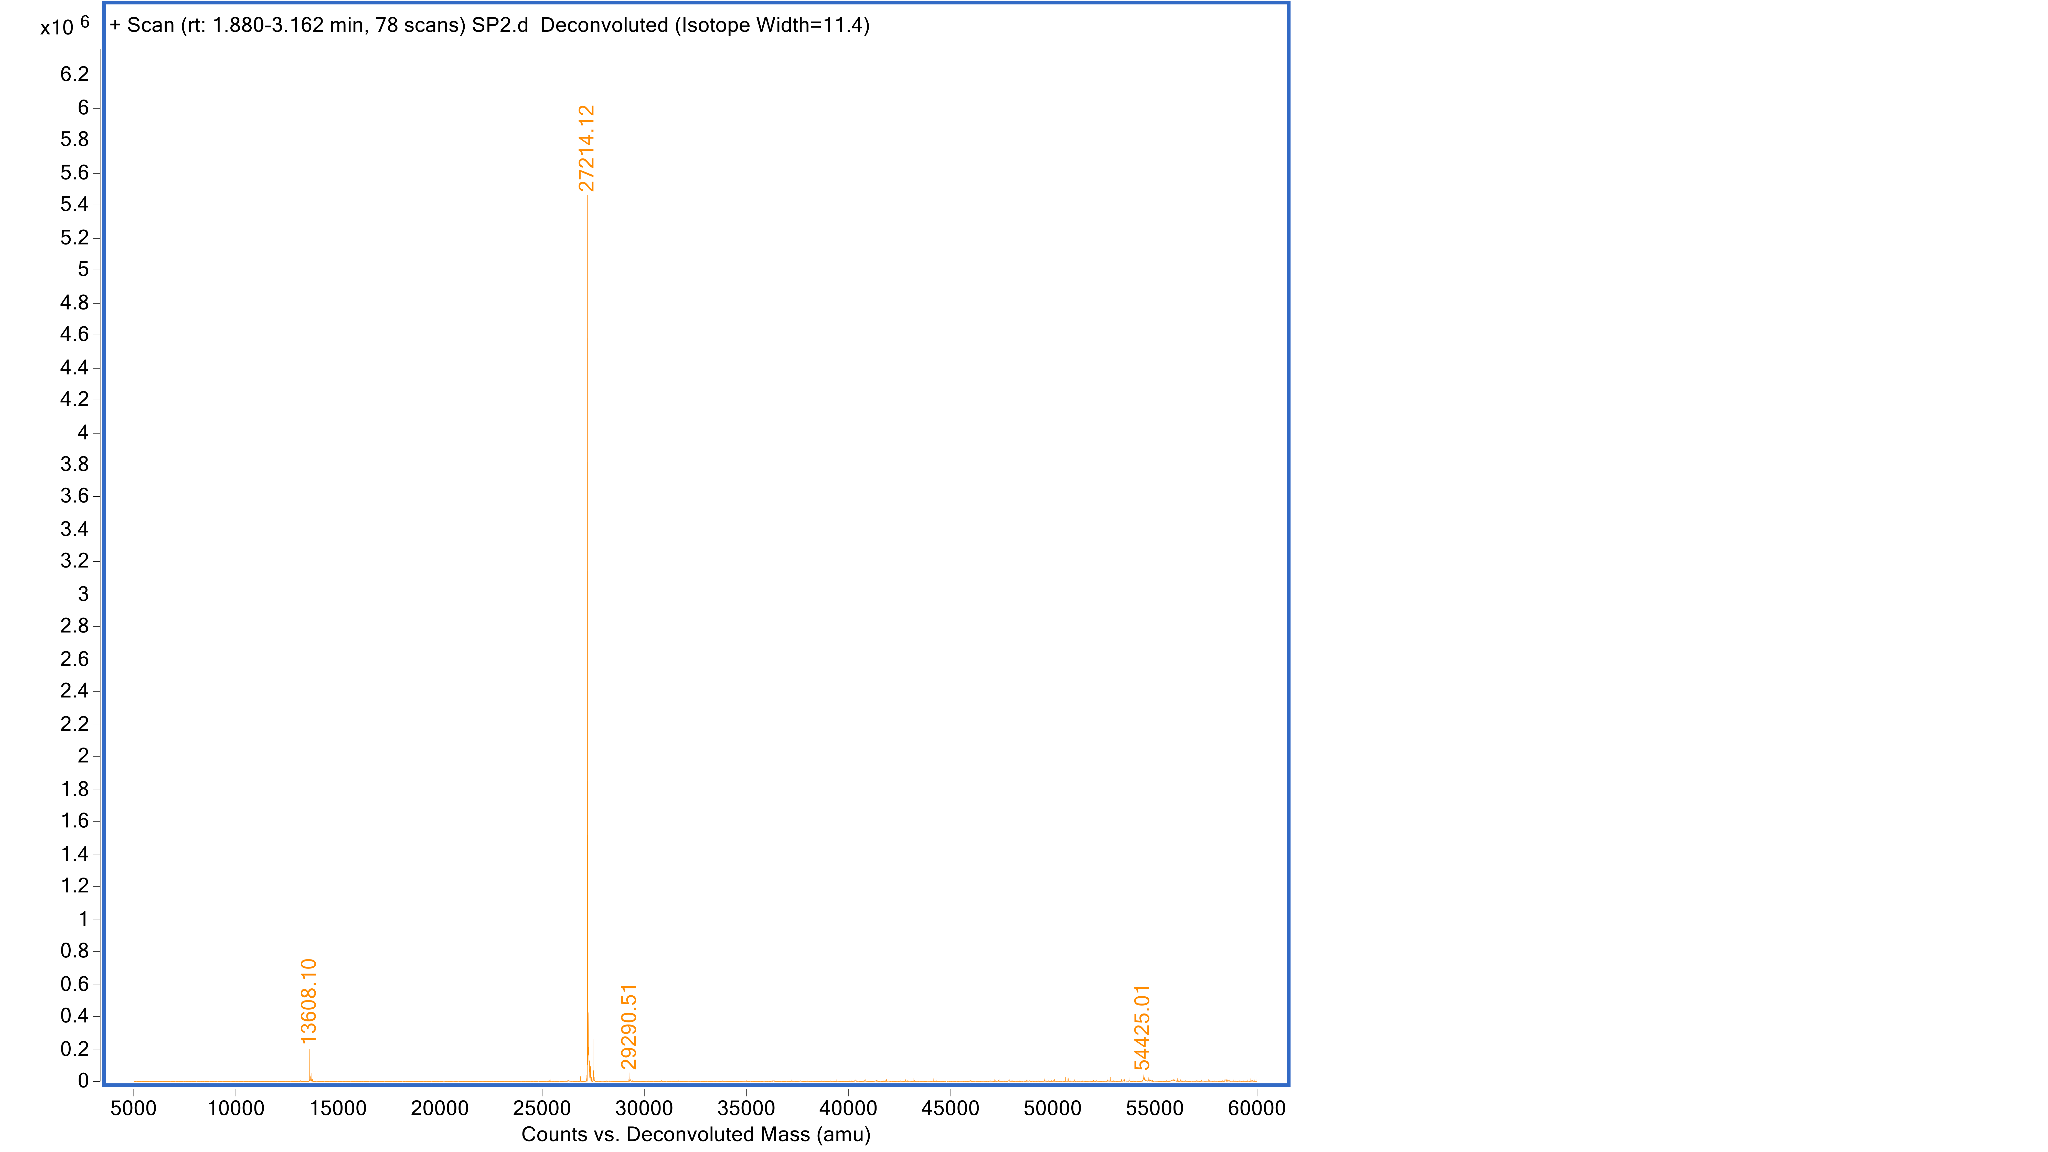** |
| --- |
| **b**  **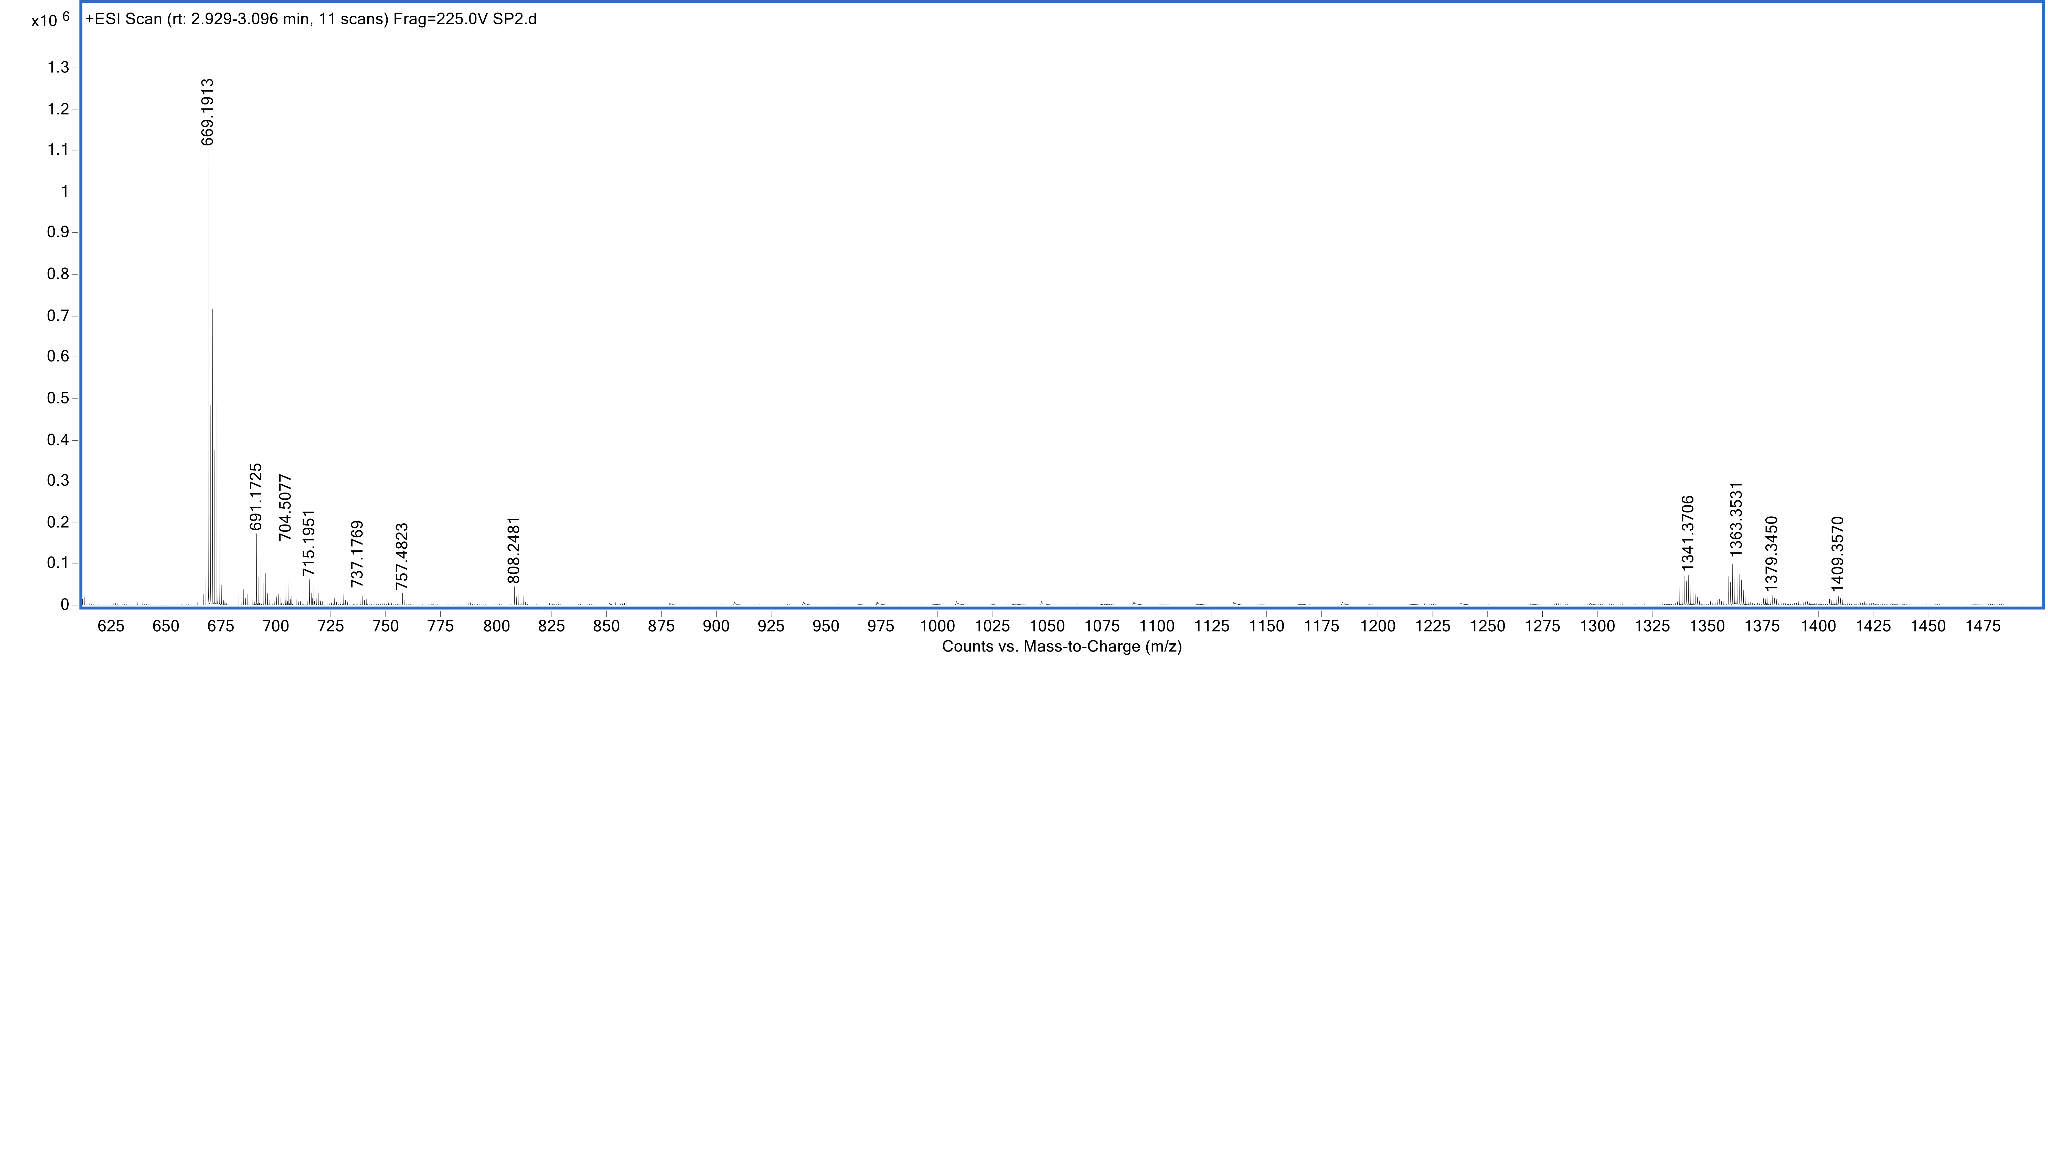** |
| **Supplementary Figure 18 | Reverse-phase liquid chromatography/mass spectrometry of SP2-ZnPPaM verifies molecular weights of protein and pigment.** (a) The dominant protein peak registers a molecular weight of 27214.1 Da; the expected protein molecular weight after cleavage by TEV protease is 27214.2 Da. (b) Mass spectrum of the same sample in the low-molecular weight range shows that ZnPPaM is present. The dominant peak at 669.2 Da is consistent with the expected molecular weight of 670.1 Da. Mass spectra were recorded after collecting CD and UV/vis spectra. |

| **a**  **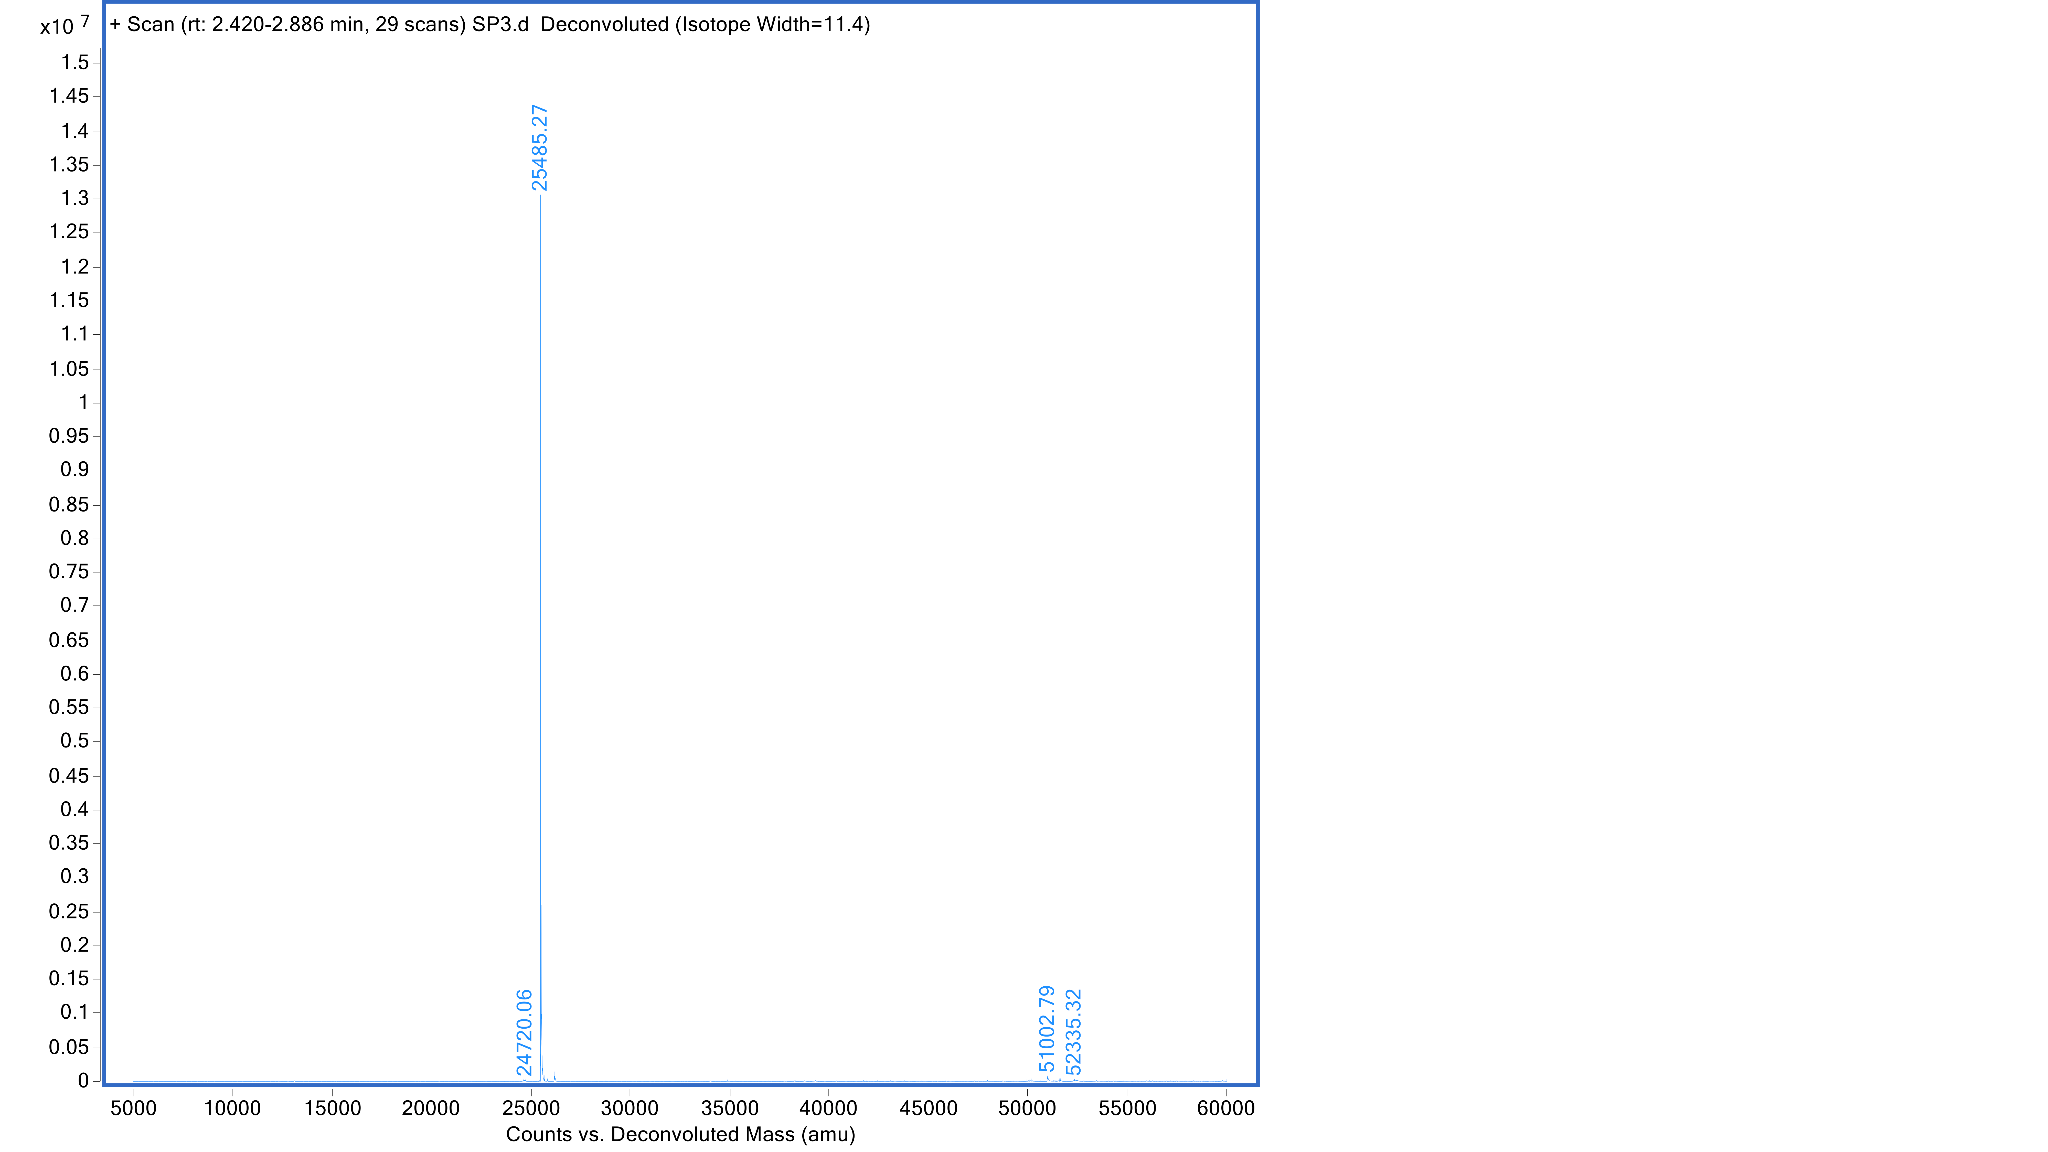** |
| --- |
| **b**  **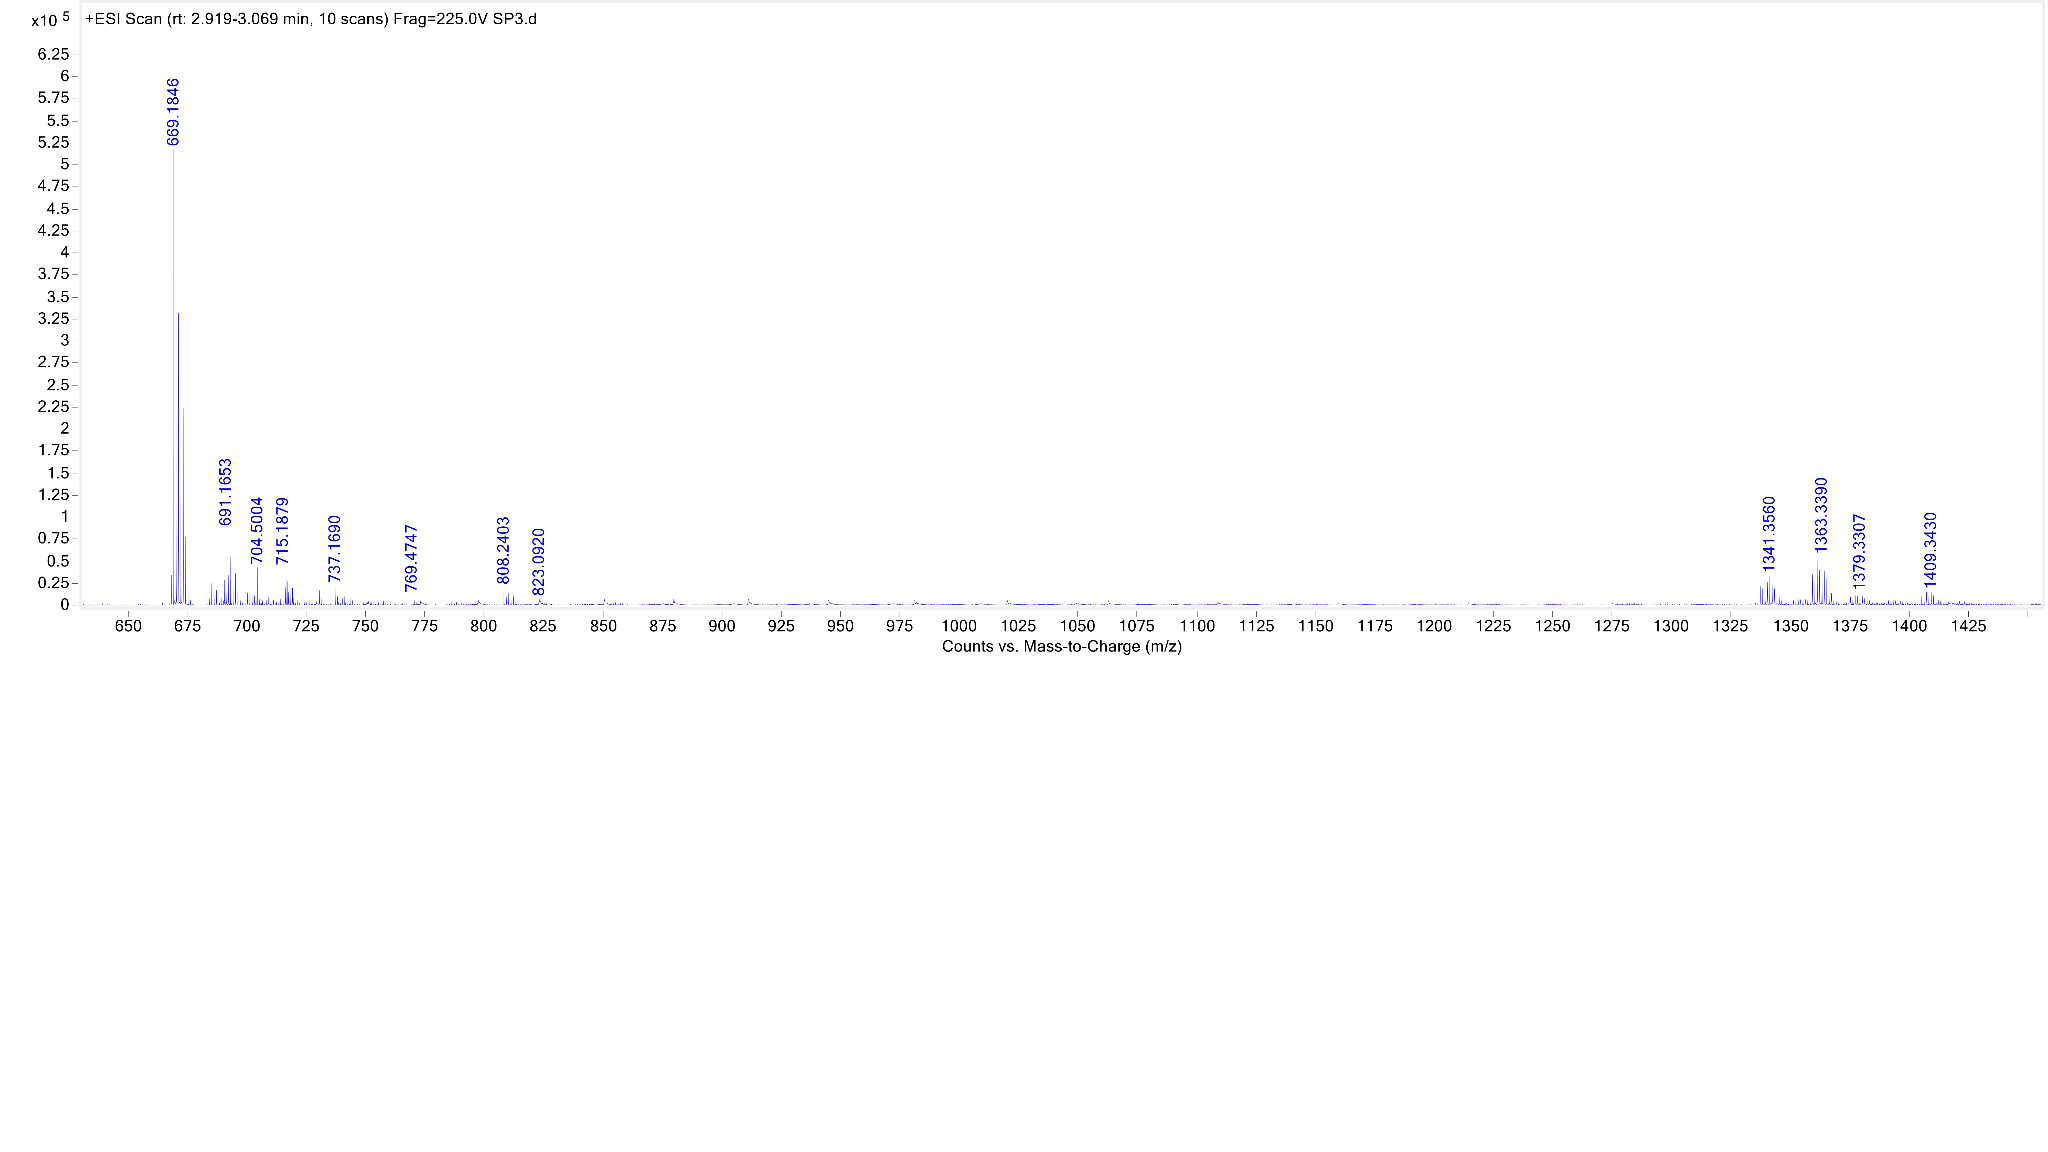** |
| **Supplementary Figure 19 | Reverse-phase liquid chromatography/mass spectrometry of SP3-ZnPPaM verifies molecular weights of protein and pigment.** (a) The dominant protein peak registers a molecular weight of 25485.3 Da; the expected protein molecular weight after cleavage by TEV protease is 25485.7 Da. (b) Mass spectrum of the same sample in the low-molecular weight range shows that ZnPPaM is present. The dominant peak at 669.2 Da is consistent with the expected molecular weight of 670.1 Da. Mass spectra were recorded after collecting CD and UV/vis spectra. |

| SP design | Amino acid sequence (after TEV protease digestion) |
| --- | --- |
| **SP1** | GGDSRELIARYQILLAELAAIRADIAAERTGDPYVRKLARELKRLAQEAAEEVKRDPSSSDVNMALLLILLMIELAVRALEAAERTGDPEVRELAAELVWLAVEAAEEVQRNPSSSDVWLALHLIMLAIWAAVAALEAAERTGDPEVRELARELVRLAVEAAEEVQRNPSSKEVYMALLLILIAILEAVLSLLRAERSGDPEKREKARERVREAVERAEEVQR |
| **SP2** | SGSGSSDEEFKFLATEAKMLITAAERLAGTDPELQEMVALIKKELEQAERTFRNGDKSEAQRQLEFVLTAARAVMNVAAAANAAGTDPELIEMVLRILKQLKEAIRTFQNGDQEEAETQLRFVLRAAIAVAVVAAALVLAGTDPELQEMVKQILEELKQAIETFARGDKEKALTQLLFVAWAAHAVAMIAAAANLAGTDPRLQQQVKEILEKLKEAIETFQKGDEEQAFRQLAEVLAEAALVALRAALTN |
| **SP3** | SGSSEELARESAEAAWRLAQAGTRLMLAWIRGDLKEIAEALIELARAVQELARVAKEYGNDELAKTAALLAAHVAMLAILVLIRAIKEGDDEVRELAKTAIKLASTAAKIVLDALPTAEEVRQITLLAKLAEEAADKKNEDSALAVGIAAAAVLLALLALEAAQKAGIEEAEKGARLLLKLAMDAARKKNPEEALAVFNAALDVSIALKLLQSAKRAGSEETRKLAEEMLRQALERARK |
| SP3x | SGSSEELARESAEAAWRLAQASTRATLAMIRGDLKELAEALIELARAVQELARVAKEYGNDELAKTAALLAAHVAMLAIWVLIRAIKEGDDEVRELAKTAIKLASTAAKIVLDALPTAEEVRQITLLAKLAEEAADKKNEDSALAVGIAAIAVIIALWALEAAQKAGIEEAEKGARLLLKLAMDAARKKNPEEALAVLNAALDVSIALQLLQSAKRAGSEETRKLAEEMLRQALERARKKN |
| JA | SGSGSWEEEAADKAIEIAEKVFRLKKSGTSEDEIAEEVAREISEVIRTLKESGSSEEVIALALLMIILGVVMALIANGVSIREQLDISATILYEVAREQGNEEALEAIEEITRLAEEIKEEGGSILAAHILTMAGLLVAALPSEEAAEVAKEIAKAVKAAVEAEKDGKSDEAMLALIRLILAIMAALFNRSKYSLEMVRRIAKEAEQLAEDAREGK |
| JB | SGSTEELKKVLEDVRELAERAKESTDPEEALIIAILVIIRALAAVALDPSEEASTAVKIAIKIAEEVAKRVSDSELSASIALLIANLALVAAKAAGDEELSKLALRLAKLAAELAKDALRIAEERGNAWQAAIAVGVVVMVATILLALAKQLGSEEALKEALEVAEEAARLAKRQLELAERVGDPIVALAAVGHVFMVAMLLAQIARESGSEEAKERAKRVAEEAEELAERVYELMRREGK |
| JC | SGSTEKLKKVLERVRELAERAKESTSPEEALIIALLVSSLAIAAVMLDPSEEASTAVKIAIKIAEEVAKRVSDSQLSASIALSIASLALVAAEAAGDEELSKLALRLAKLAAELAKDALRIAEERGNAIDAAIAVGIVVMVAAILLQLAKLLGSEEALKEALEVAEEAARLAKRVLELAERVGDPQVALAAVGHVQMVAILLAQIARESGSEEAKERAERVARESMELAERVLELMRREGKW |
| JD | SGSSDEEYARMSAELAEEAAKEALEQAKREGDEDARRVAEELEKQAEEARRKKDFDLANLVLMAAIILLLALIILELAKKAGNEQMEASGLSLLATAALLAAAGGENSEDARKALEAALRLAERATEVLEKIAKKGETALEKAIAAGTLVMLIQIIIQIAELLSKLGDTEEAKKVLDIAIELIKRVTEILERIAKKADTDILAQAAAGHLIYLIQLLMQISILLRRLGNIDEAFKVLEEARELAERVRELLERIAKNSDK |
| JE | SGSGSSDELAALFLIISAKSQAWQAQSAAERTGDPRVRELARELKRLAQEAAEEVKRDPSSSEVNKNLQLISMAIALAVLALQLARKAGDEEARDIAREAVEVAVRAAQLILEGRDEQRAQTLFLIAHALLMAVMAARLGNSEVAELAVKVLRLAKELEKLLPSEIALFVVLMIALAALSAAMAASGGQEDYARDALRRLEEAIREAEENRSKESLEKVIEEAIEAMLQANRAQTGG |
| JF | SGSGSSDELQARFLILSAKLQAEMAQIAAERTGDPRVRELARELKRLAQEAAEEVKRDPSSSEVNSNLALISMAIALAVLALLLARKAGDEEARDIAREAVEVAVRAAELILEGRDDQRAWTLWLIAHALLMAVYAARLGNSEVAELAVKVLRLAKELEKLLPSEEALFVVSMIGLAALQAAMAAAGGQEDYARDALRRLEEAIREAEENRSKESLEKVEEEGIEAMEQALRAIAGG |
| JG | SGSGSSDELEARLLIISANLQAEMAQIAAERTGDPRVRELARELKRLAQEAAEEVKRDPSSSEVNQNLTLISMAIALAVLALLLARKAGDEEARDIAREAVEVAVRAAELILEGRDEQRAWTLFLIAHALLLAVLAARLGNSEVAELAVKVLRLAKELEKLLPSEIALFVVSMIGMAALQAAMAASGGQEDYARDALRRLEEAIREAEENRSKESLEKVMEEAIRAYEQALRALAGG |
| JH | SGSSEELAREAREAAIRLAQASTKLMEAMIRGDLKELAEALIELARAVQELARVAKEYGNDELAKLAAFLAAHIAMLAIWVLILAIREGDDEVRELAKTAIKLASTAAKIVLDALPTAEEVRIITLLAKLAEEAADKKNEDSALAVLIAAMAVLIALAALEAAQRAGIEEAEKAARLLLKLAGEAARKKNPEEAKAVYNAALLVSIALLLLQKAKRAGSEETRRLAEEMLRQALERARKKN |
| D2K | SGSGSREKELKQLISNLQILLLILLSQDPNNELVRKLQEKIKEAEEQGDPRRLKLIWWILALINILQALEQEDPNNELVKRLKELIKRALEEGDPRLLQLILLILHLIWLLQALEKEDPNNELVKRLKKLIEEALKEGDPRKLWQILALLLWIAQIQKLKKQDPNNELIKRAEETLEQSLKT |
| D2L | SGSGSREKELKQLISNLQILLLILLSEDPNNELVRKLQEKIKEAEEQGDPRRLKLIWWILNLIQMLQQLEQEDPNNELVKRLKELIKRALEEGDPRLLLLIHIILALIWLLQALEKEDPNNELVKRLKKLIEEALKEGDPRKLIQIALLLTWIATIQRLKKQDPNNELIKRAEETLEQSLKT |
| D2M | SGSGSEEEQIRLAQLAIQIIQYQVEKNGDEQLLRLIQEITEQLQKEGDERLIAILSTMFGIIWILEQVEKNGDEELLRLIQEITEKLARQGDERLIQIGAAMLAIIIILEQVKKNGDEQLLRLIREITRKLAEEGDQRLIWILHAMMAIIMSSEELEKNGDEELLQKLRELLEKIAKE |
| D2N | SGSGSEEEEIRLAQLTIQIIQYQVEKNGDEQLLRLIQEITEQLQKEGDERLIRILNAMFTIIWILEAVEKNGDEELLRLIQEITEKLARQGDERLIKILSAMAGIIWILEIVKKNGDEQLLRLIREITRKLAEEGDERLIQILANMHSIIISSEELEKNGDEELLQKLRELLEKIAKELEHHHHHH |
| **Supplementary Table 1 | Amino acid sequences of designed chlorophyll special pair proteins.** Shown are the protein sequences after expression using a pET-29b(+) vector and cleavage of N-terminal MGHHHHHHGSGSGENLYFQ sequence by TEV protease. | |
| D2O | SGSGSEEEEIRLAQLAIQIIQYQVEKNGDEQLLRLIQEITEQLQKEGDERLIRILLAMFAIILILEHVEKNGDEELLRLIQEITEKLARQGDERLIRILIAMAGIIWILELVKKNGDEQLLRLIREITRKLAEEGDERLIQILLAMHAIIISSEQLEKNGDEELLQKLRELLEKIAKE |
| D2P | SGSGSEEEEKRLIEKMSKFIWWFAQQLGDERILRAVEKLQQEIKENSPTPETFMTLINLLLSLLIWWAAQKLGDEKILEAVERLLQQIEENSPTPETHMTLAALAQSLAIWQQAQKLGDEDILEAVERLLEEIQRNSPTPSTLIKLTWLLLLLNNWQELQKQGDEEQLRSSEKAMKELKE |
| D2Q | SGSGSEEEEKRLIEKMSKFIWWFAQQLGDERILRAVEKLQQEIKENSPTPETYMTLGNLLLSLLIWWAAQQLGDEKILEAVERLLQQIEENSPTPETHLTLAILMSALAIWQQAQKLGDEDILEAVERLLEEIQRNSPTPSTMTKLLWLALLLNNWEELQKQGDEEQLRSSEKAMKELKE |
| D2R | SGSGSEEEELKRLQTLIKYLQLLIQNAKWQNPDDELLRQVEELIEEMKKRLEENPNSQEDQALLKLLITIIALIIMILWLKSENPDDELLRQVEELIKEMIERLKENPNSQEDQALLQLLHAILGLILLIQQLKKQNPDDELLQQVEELIEEMIKRLKENPNSEKDQILLSFLALSLLSIFLIQTQKKQNPDDERLKQWEKQIKESIESSKE |
| D2S | SGSGSEEEELERLKEQLKIWQKLIKLILEQDPNDEQIRRILEQAEEIIQKLQEDPNNEELQRLIQLLFNLVAIIFSIKQILELDPNDEQIRRILEQAKEIIQKLQEDPNNEELFLLAHMLFALVAIILLIKLMLEQDPNDELIREILEQAKEIIQKLQEDPNNAELAMLIALLLSLVLWIWFMKFQLEQDPNDEEIRRQLEQLEERIRRTLE |
| D2T | SGSGSEEEELERLKEQLKIWQKLIKLILEQDPNDEQIRRILEQAEEIIQKLQEDPNNEELQRLIQLLFQLVLGIFIIKQILELDPNDEQIRRILEQAKEIIQKLQEDPNNEELYRLQGLLGMLVGIILLIKLMLEQDPNDELIREILEQAKEIIQKLQEDPNNQELLSLIHLLLALVLWIWFMKFQLEQDPNDEEIRRQLEQLEERIRRTLE |
| tj79C2-  H62A | SGSGSRYDELNARLLILLAELAAERADIAAERTGDPRVRELARELKRLAQEAAEEVKRDPSSWSVLHALWLIVVAIEAAVRALEAAERTGDPEVRELARELVRLAVEAAEEVQRNPSSWDVFMALLLIVFAIEAAVRALEAAERTGDPEVRELARELVRLAVEAAEEVQRNPSSKEVDMALLLILIAILEAVLSLLRAERSGDPEKREKARERVREAVERAEEVQRDPSGW |
| tj79C2-  H65A | SGSGSREDELLARYLILLAELAAEEADIAAERTGDPRVRELARELKRLAQEAAEEVKRDPSSSDVNHALHLIVLAILIAVEALEAAERTGDPEVRELARELVRLAVEAAEEVQRNPSSSDVLKALILILLAIIQAVKALEAAERTGDPEVRELARELVRLAVEAAEEVQRNPSSKEVTMALLLILIAILEAVLSLLRAERSGDPEKREKARERVREAVERAEEVQRDPSGW |
| tj79C2-  H65B | SGSGSREDELFARYLILLAELAAERADIAAERTGDPRVRELARELKRLAQEAAEEVKRDPSSSDVNLALHLIVLAILAAVEALEAAERTGDPEVRELARELVRLAVEAAEEVQRNPSSSDVLKALMLIVLAILQAVQALEAAERTGDPEVRELARELVRLAVEAAEEVQRNPSSKEVYMALLLILIAILEAVLSLLRAERSGDPEKREKARERVREAVERAEEVQRDPSGW |
| tj79C2-  H65C | SGSGSREDELIARYLILLAELAAERADIAAERTGDPRVRELARELKRLAQEAAEEVKRDPSSSDVFMALHLIVLAIQIAVKALEAAERTGDPEVRELARELVRLAVEAAEEVQRNPSSSDVFLALLLIVTAIMLAVEALEAAERTGDPEVRELARELVRLAVEAAEEVQRNPSSKEVLMALLLILIAILEAVLSLLRAERSGDPEKREKARERVREAVERAEEVQRDPSGW |
| tj79C2-  H65D | SGSGSREDELQARLLILLIELAAERADIAAERTGDPRVRELARELKRLAQEAAEEVKRDPSSSDVWLALHLIVIAILIAVEALEAAERTGDPEVRELARELVRLAVEAAEEVQRNPSSSDVLKALMLILIAILLLLEALEAAERTGDPEVRELARELVRLAVEAAEEVQRNPSSKEVQMALLLILIAILEAILSLLRAERSGDPEKREKARERVREAVERAEEVQRDPSGW |
| tj79C2-  H65E | SGSGSREDELWARLLILLIELAAERADIAAERTGDPRVRELARELKRLAQEAAEEVKRDPSSSDVLLALHLIVIAILIAVEALEAAERTGDPEVRELARELVRLAVEAAEEVQRNPSSSDVLIALMLILIAILLLLEALEAAERTGDPEVRELARELVRLAVEAAEEVQRNPSSKEVQMALLLILIAILEAILSLLRAERSGDPEKREKARERVREAVERAEEVQRDPSGW |
| tj79C2-  H69A | SGSGSREDELQARLQLLAAELAAEEADIAAERTGDPRVRELARELKRLAQEAAEEVKRDPSSSDVNAALVLITHAIMLAVEALKAAERTGDPEVRELARELVRLAVEAAEEVQRNPSSSDVNKALFLIMMAIITAVTALEAAERTGDPEVRELARELVRLAVEAAEEVQRNPSSKEVDMALLLILIAILEAVLSLLRAERSGDPEKREKARERVREAVERAEEVQRDPSGW |
| tj79C2-  H69B | SGSGSREDELHARYLILSAELAAERADIAAERTGDPRVRELARELKRLAQEAAEEVKRDPSSSDVNKALLLITHAILIAVAALEAAERTGDPEVRELARELVRLAVEAAEEVQRNPSSSDVNRALFLIMMAIMMAVKALEAAERTGDPEVRELARELVRLAVEAAEEVQRNPSSKEVDMALLLILIAILEAVLSLLRAERSGDPEKREKARERVREAVERAEEVQRDPSGW |
| tj79C2-  H121A | SGSGSREDELIARYQILLAELAAERADIAAERTGDPRVRELARELKRLAQEAAEEVKRDPSSSDVNMALLLILLMIELAVRALEAAERTGDPEVRELARELVRLAVEAAEEVQRNPSSSDVWQALHLIMLAIWAAVAALEAAERTGDPEVRELARELVRLAVEAAEEVQRNPSSKEVYMALLLILIAILEAVLSLLRAERSGDPEKREKARERVREAVERAEEVQRDPSGW |
| tj79C2-  H121B | SGSGSREDELLARLLLLLAELAAERADIAAERTGDPRVRELARELKRLAQEAAEEVKRDPSSSDVLMALLLIIMAIEAAVEALEAAERTGDPEVRELARELVRLAVEAAEEVQRNPSSSDVWWALHLILFAIQLAVRALEAAERTGDPEVRELARELVRLAVEAAEEVQRNPSSKEVDMALLLILIAILEAVLSLLRAERSGDPEKREKARERVREAVERAEEVQRDPSGW |
| tj79C2-  H121C | SGSGSREDELLARLLILLAELAAERADIAAERTGDPRVRELARELKRLAQEAAEEVKRDPSSSDVLMLLLLIVLAIQAAVEALEAAERTGDPEVRELARELVRLAVEAAEEVQRNPSSSDVFMALHLILFAIQLAVQALEAAERTGDPEVRELARELVRLAVEAAEELQRNPSSKEVQMALLLILIAILEAVLSLLRAERSGDPEKREKARERVREAVERAEEVQRDPSGW |
| **Supplementary Table 1 (continued) | Amino acid sequences of designed chlorophyll special pair proteins.** | |
| tj79C2-  H125A | SGSGSREDELWARYTLLLAELAAERADIAAERTGDPRVRELARELKRLAQEAAEEVKRDPSSSDVYLALILIVMAIYMAVLALEAAERTGDPEVRELARELVRLAVEAAEEVQRNPSSSDVNKALLLIVHAIMAAVAALEAAERTGDPEVRELARELVRLAVEAAEEVQRNPSSKEVDMALLLIQIAILEAVLSLLRAERSGDPEKREKARERVREAVERAEEVQRDPSGW |
| tj79C2-  H132A | SGSGSREDELRARLLILLAELAAETLDIIAERTGDPRVRELARELIRLLQEAAEEVKRDPSSSDVNEALKLIVEAIFMAIFILLFAEQTGDPEVRELARELVRLAVEAAEEVQRNPSSSDVNEALKLIIQAIILAVHALLAAEKTGDPEVRELARELVRLAVEAAEEVQRNPSSKEVDMALLLILIAILEAVLSLLRAQRSGDPEKREKARERVREAVERAEEVQRDPSGW |
| D13_H11A | SGSGSEEKEWQAMTLHLIFAIKILKEMLEEDPNDEEIKKILELLWQISKTQQDDPHNEEQKEWLMLLLLIIMALRLVQEMLKEDPNDEEIEKILELLKQILRTLREDPHNEEQKEWLILLLIIILLLDSVQEMLKEDPNDEEIEKILELLKQILRTLREDPHNEEQKQWLIQLINALILLLFIQEKLKEDPNDEEAEEELERLKEQLRRLRE |
| D13_H11B | SGSGSEEKEWQAMTAHLIYAIKILKEMLEEDPNDEEIKKILELLWQISKTQQDDPHNEEQKEWLILLLIIILALRLVQEMLKEDPNDEEIEKILELLKQILRTLREDPHNEEQKEWLSLLFIIIALLDSVQEMLKEDPNDEEIEKILELLKQILRTLREDPHNEEQKQWLIQLINALILLLFIQEKLKEDPNDEEAEEELERLKEQLRRLRE |
| D13_H11C | SGSGSEEKEWAIMTAHLIYAIKVLKEMLEEDPNDEEIKKILELLWQISKTQQDDPHNEEQKEWLMLLLGIILALRLVQEMLKEDPNDEEIEKILELLKQILRTLREDPHNEEQKEWLALLVIIILLLDSVQEMLKEDPNDEEIEKILELLKQILRTLREDPHNEEQKQWLIQLINALILLLFIQEKLKEDPNDEEAEEELERLKEQLRRLRE |
| D13_H60A | SGSGSEEKEWMLLTAMLIMAIKTLKEMLEEDPNDEEIKKILELLWQISKTQQDDPHNEEQKEWLHLLLIIIMALRLVQEMLKEDPNDEEIEKILELLKQILRTLREDPHNEEQKEWLILLFIIIALLDSVQEMLKEDPNDEEIEKILELLKQILRTLREDPHNEEQKQWLIQLINALILLLFIQEKLKEDPNDEEAEEELERLKEQLRRLRE |
| D13_H60B | SGSGSEEKEWQLLTWLLIMIIKTLKEMLEEDPNDEEIKKILELLWQISKTQQDDPHNEEQKEWLHLLAAIILALRLVQEMLKEDPNDEEIEKILELLKQILRTLREDPHNEEQKAWLLLLVIIIALLDSVQEMLKEDPNDEEIEKILELLKQILRTLREDPHNEEQKQWLIQLINALILLLFIQEKLKEDPNDEEAEEELERLKEQLRRLRE |
| JIa | SGSSEELARESAEAAWRLAQAGTRAALAAIRGDLKELAEALIELARAVQELARVAKEYGNDELAKTAALLAAHVALLAILVLIRAIKEGDDEVRELAKTAIKLASTAAKIVLDALPTAEEVRQITLLAKLAEEAADKKNEDSALAVGIAAAAVLAALLALEAAQKAGIEEAEKGARLLLKLAMDAARKKNPEEALAVLNAALDVSIALRLLQSAKRAGSEETRKLAEEMLRQALERARK |
| JIc | SGSSEELARESAEAAWRLAQAATRLVLALIRGDLKEVAEALIELARAVQELARVAKEYGNDELAKTAAWLAAHVAMLAIYVLIRAIKEGDDEVRELAKTAIKLASTAAKIVLDALPTAEEVRQITLLAKLAEEAADKKNEDSALAVGIAAIAVLIALLALEAAQKAGIEEAEKGARLLLKLAMDAARKKNPEEALAVLNAALDVSIALRLLQSAKRAGSEETRKLAEEMLRQALERARK |
| JId | SGSSEELARESAEAAWRLAQAATRLVLAVIRGDLKEIAEALIELARAVQELARVAKEYGNDELAKTAAFLAAHVALLAIIVLIRAIKEGDDEVRELAKTAIKLASTAAKIVLDALPTAEEVRQITLLAKLAEEAADKKNEDSALAVGIAAAAVLLALLALEAAQKAGIEEAEKGARLLLKLAMDAARKKNPEEALAVLNAALDVSIALRLLQSAKRAGSEETRKLAEEMLRQALERARK |
| JIe | SGSSEELARESAEAAWRLAQAATRIMLAVIRGDLKEIAEALIELARAVQELARVAKEYGNDELAKTAAFLAAHVALLAIIVLIRAIKEGDDEVRELAKTAIKLASTAAKIVLDALPTAEEVRQITLLAKLAEEAADKKNEDSALAVGIAAMAVLIALLALEAAQKAGIEEAEKGARLLLKLAMDAARKKNPEEALAVFNAALDVSIALRLLQSAKRAGSEETRKLAEEMLRQALERARK |
| D_3_114_2 | SGSGSSDEEFKWLATWAKMAITAAERAAGTDPELQEMVALIKKELEQAERTFRNGDKSEAWRQLVFVAIAAAAVLAVALAANAAGTDPELQEMVDRILKQLKEAIRTFQNGDQEEAETQLFFVLLAAAAVAVVALALIWAGTDPELQEMVKQILEELKQAIETFARGDKEKALTQLLFVLWAAHAVLWIAIAANTAGTDPRLQQQVKEILEKLKEAIETFQKGDEEQAFRQLAEVLAEAVLVALRAMKTN |
| D_3_114_3 | SGSGSSDELFKWLATEAKMAITAAERLAGTDPELQEMVALIKKELEQAERTFRNGDKSEAMRQLLFVLMAANAVAAVAAAANMAGTDPELQEMVDRILKQLKEAIRTFQNGDQEEAMTQLAFVLLAAAAVFVVAWALILAGTDPELQEMVKQILEELKQAIETFARGDKEKALTQLLFVLWAAHAVAWIALAALLAGTDPRLLQQVKEILEKLKEAIETFQKGDEEQAFRQLAEVLAEAILVAIRAAKTN |
| D_3_114_4 | SGSGSSDEEFKFLATMAKMAITAAERAAGTDPELQEMVALIKKELEQAERTFRNGDKSEAQRQLWFVWVAALAVAAVALAANAAGTDPELQEMVDRILKQLKEAIRTFQNGDQEEAETQLRFVLMAAAAVAVVALARLWAGTDPELQEMVKQILEELKQAIETFARGDKEKALTQLLFVLWAAHAVLWIAIAANLAGTDPRLQQQVKEILEKLKEAIETFQKGDEEQAFRQLAEVLAEAVLVALRARKTN |
| D_3_114_5 | SGSGSSDFEFKMLATWAKMAITAAERAAGTDPELQEMVALIKKELEQAERTFRNGDKSEAMRQLEFVLTAANAVLAVALAANMAGTDPELQEMVDRILKQLKEAIRTFQNGDQEEAEDQLLFVLAAATAVAVVAWAKILAGTDPELQEMVKQILEELKQAIETWARGDKEKAATQLLFVMWAAHAVAAIALAANVAGTDPRLQQQVKEILEKLKEAIETFQKGDEEQAFRQLAEVLAEAMLVAIRALLTN |
| **Supplementary Table 1 (continued) | Amino acid sequences of designed chlorophyll special pair proteins.** | |

| **Protein name** | **RG predicted from design model (Å)** | **RG calculated from Guinier analysis of SAXS data (Å)** |
| --- | --- | --- |
| **SP1** | 21.9 | 27.5 |
| **SP2** | 21.8 | 23.4 |
| **SP3** | 21.2 | 24.4 |
| SP3x | 21.4 | 24.4 |
| JA | 20.9 | 23.3 |
| JB | 21.9 | 24.0 |
| JC | 21.8 | 26.0 |
| JD | 22.3 | 28.2 |
| JE | 21.6 | 32.1 |
| JF | 21.6 | 32.6 |
| JG | 21.6 | 28.8 |
| JH | 21.5 | 26.7 |
| D2T | 22.4 | 25.5 |
| tj79C2-H62A | 22.2 | 27.4 |
| tj79C2-H65B | 22.4 | 26.3 |
| tj79C2-H69A | 22.6 | 26.3 |
| tj79C2-H121A | 22.4 | 26.0 |
| tj79C2-H121B | 22.5 | 25.3 |
| tj79C2-H121C | 22.4 | 25.4 |
| D13_H60A | 22.7 | 25.0 |
| **Supplementary Table 2 | Small angle X-ray scattering (SAXS) analysis of radii of gyration (RG).** RG values were calculated from SAXS profiles shown in Supplementary Figure 2 using Guinier Analysis in the program PRIMUS, part of the ATSAS software package [(Manalastas-Cantos et al. 2021)](https://paperpile.com/c/1ZjmK7/v6Nn). Expected RG values based on apo-states of design models and data fitting were calculated using the FoXS server [(Schneidman-Duhovny et al. 2013, 2016)](https://paperpile.com/c/1ZjmK7/20Kw+uAZA). The systematic underprediction of RG values (including for proteins with solved X-ray crystal structures) is likely the result of SAXS detection of dense hydration shells around the highly charged SP proteins that was not accounted for in design models [(Kim et al. 2016; Svergun et al. 1998)](https://paperpile.com/c/1ZjmK7/fgcV+9VMu). | | |

| Sample | Absorbance Maximum (ε, λ) | CD minimum or maximum (Δε, λ) | Δε/ε Ratio |
| --- | --- | --- | --- |
| ZnPPaM in DEF | 78,000 M-1cm-1,  658 nm | -16.2 M-1cm-1, 657 nm | -2.1×10-4 |
| ZnPPaM in DMSO | 76,000 M-1cm-1,  660 nm | -17.8 M-1cm-1, 663 nm | -2.3×10-4 |
| ZnPPaM in MeOH | 71,000 M-1cm-1,  657 nm | -14.7 M-1cm-1, 659 nm | -2.1×10-4 |
| SP1-ZnPPaM | 49,000 M-1cm-1,  667 nm | -10.4 M-1cm-1, 661 nm | -2.1×10-4 |
| 4.0 M-1cm-1, 684 nm | 0.8×10-4 |
| SP2-ZnPPaM | 38,200 M-1cm-1,  668 nm | -16.5 M-1cm-1, 674 nm | -4.3×10-4 |
| 12.7 M-1cm-1, 698 nm | 3.3×10-4 |
| SP3-ZnPPaM | 39,000 M-1cm-1,  666 nm | -16.7 M-1cm-1, 664 nm | -4.3×10-4 |
| 16.9 M-1cm-1, 694 nm | 4.3×10-4 |
| **Supplementary Table 3 | ZnPPaM CD signal intensities in SP proteins compared to organic solvent controls.** The Δε/ε ratio gives an indication of the CD signal intensity relative to absorbance. In organic solvents, ZnPPaM has a non-conservative negative CD transition in the Qy region with Δε/ε ratio of -2.1×10-4 to -2.3×10-4. In the weakly coupled ZnPPaM dimer of SP1, the transition is similarly asymmetric with a comparable Δε/ε ratio, but a smaller positive peak is also present at 684 nm. In contrast, the conservative Cotton effects of ZnPPaM bound to either SP2 or SP3 have close to double the Δε/ε ratio, consistent with stronger excitonic coupling between the chromophores. See Figure 2 in the main text and Supplementary Figure 3 for spectra. | | | |

|  | SP1-ZnPPaM  (PDB ID: 7UNJ) | SP2 (apo-state)  (PDB ID: 7UNH) | SP2-ZnPPaM  (PDB ID: 7UNI) | SP3x (apo-state)  (PDB ID: 8EVM) |
| --- | --- | --- | --- | --- |
| Well solution | 32% (w/v) PEG-3350, 200 mM lithium sulfate, 100 mM BisTris pH 6.5 | 24% (w/v) PEG-3350, 140 mM KCl | 30% (w/v) PEG-3350, 100 mM ammonium sulfate | 2.4 M sodium malonate dibasic monohydrate, pH 7.0 |
| **Data Collection** |  |  |  |  |
| Space Group | P41 | P21 | P1 | P31 2 1 |
| Unit Cell  Dimensions | a=b=52.35 Å,  c=173.72 Å,  a=b=c=90° | a=54.13 Å, b=76.1 Å,  c=63.23 Å, b=99.06°, a=c=90° | a=52.8 Å, b=54.9 Å,  c=89.3 Å, a=87.83°, b=84.06°, c=69.45° | a=b=88.732 Å,  c=149.484 Å,  a=b=90°, c=120° |
| Resolution | 36.2 - 2.0 Å  (2.07 - 2.0) | 28.89 - 2.4 Å  (2.46-2.4) | 49.26 - 2.07 Å  (2.13 - 2.07) | 44.37 - 3.05 Å  (3.16 - 3.05) |
| Reflections | 31367 | 19927 | 31294 | 13483 (1311) |
| Completeness (%) | 99.8 (99.5) | 98.2 (98.2 ) | 92.3 (60.2) | 99.42 (96.27) |
| Redundancy | 13.0 (13.2) | 48.7 (49.7) | 3.5 (3.4) | 10.8 (10.7) |
| I/s(I) | 32.4 (5.4) | 50.1 (22.7) | 7.5 (0.9) | 11.54 (0.62) |
| Rmerge | 0.066 (0.429) | 0.082 (0.213) | 0.067 (1.297) | 0.1943 (5.037) |
| Rpim | 0.019 (0.121) | 0.012 (0.030) | 0.043 (0.834) | 0.0612 (1.595) |
| CC1/2 | 0.999 (0.967) | 1.01 (0.84) | 0.98 (0.97) | 0.999 (0.248) |
| **Refinement** |  |  |  |  |
| Resolution | 36.2 - 2.0 Å | 28.89 - 2.4 Å | 49.26 - 2.5 Å | 44.37 - 3.05 Å |
| Rwork / Rfree | 0.196 (0.219) /  0.237 (0.291) | 0.209 (0.223) /  0.263 (0.322) | 0.201 (0.258) /  0.251 (0.321) | 0.2509 (0.3917) /  0.3017 (0.4188) |
| Rmsd bonds | 0.006 Å | 0.002 Å | 0.007 Å | 0.003 Å |
| Rmsd angles | 0.76° | 0.37° | 0.86° | 0.55° |
| Wilson B-factor | 38.31 | 22.70 | 52.90 | 112.91 |
| Number of  protein atoms | 3203 | 3656 | 6684 | 3539 |
| Number of ligand atoms | 107 | 8 | 206 | 0 |
| Number of water atoms | 65 | 189 | 9 | 0 |
| Ramachandran Distribution (Favored%/  Allowed%/  Outlier%) | 99.54 / 0.23 / 0.23 | 99.38 / 0.62 / 0.0 | 97.7 / 2.09 / 0.21 | 98.08 / 1.92 / 0.0 |
| **Supplementary Table 4 | Summary of X-ray crystallographic data collection and refinement statistics.** | | | | |

| Microscope | Titan Krios |
| --- | --- |
| Voltage (kV) | 300 |
| Exposure navigation | Image shift |
| Nominal magnification | 64000X |
| Detector | Gatan K3 |
| Pixel size (Å/pix) | 1.076 |
| No. of frames | 40 |
| Dose rate (e-/Å/s) | 24.99 |
| Exposure per frame (e-/Å2) | 1.25 |
| Total dose (e-/Å2) | 49.99 |
| Exposure time (s) | 2.0 |
| Defocus range (µm) | 0.3 - 2.5 |
| Number of grids imaged | 2 |
| Total number of micrographs | 9531 |
| **Supplementary Table 5 | CryoEM data acquisition.** | |

| *Image Processing* | **Full nanocage**  **(*Map #1)*** | **ZnPPaM-binding region**  ***(Map #2)*** |
| --- | --- | --- |
| Software used | Cryosparc v.3 | Cryosparc v.3 |
| No. of extracted particles | 359331 | |
| No. of final particles | 205014 | 237042 |
| No. of refined particles | 205014 | 2844504 (expanded w/T symmetry) |
| Box size (pixels) | 364 | 364 |
| Symmetry imposed in final refinement | O | None (C1) |
| Global map resolution (FSC 0.143 unmasked) | > 6Å | > 5Å |
| Map sharpening B factor (Å2) | none | none |
| EMDB ID | EMD-40208 | EMD-40209 |
| **Supplementary Table 6 | CryoEM data processing.** | | |

| Map CC (mask) | 0.62 |
| --- | --- |
| Map CC (volume) | 0.63 |
| Map CC (peaks) | 0.55 |
| R.m.s. deviations (bonds) | 0.002 |
| R.m.s. deviations (angles) | 0.456 |
| Ramachandran plot values (%) |  |
| outliers | 0 |
| allowed | 2.14 |
| favored | 97.86 |
| C-beta deviations (%) | 0 |
| CaBLAM outliers (%) | 1.09 |
| Overall score (Molprobity [(Williams et al. 2018)](https://paperpile.com/c/1ZjmK7/pWK1T)) | 1.47 |
| Clashscore | 8.05 |
| PDB ID | 8GLT |
| **Supplementary Table 7 | Statistics for nanocage polyalanine model fitted and refined to cryo-EM map (EMD-40208).** | |

**Supplemental References**

[Adolphs, Julia, and Thomas Renger. 2006. “How Proteins Trigger Excitation Energy Transfer in the FMO Complex of Green Sulfur Bacteria.” *Biophysical Journal* 91 (8): 2778–97.](http://paperpile.com/b/1ZjmK7/s32e)

[Barros, Emilia P., Jamie M. Schiffer, Anastassia Vorobieva, Jiayi Dou, David Baker, and Rommie E. Amaro. 2019. “Improving the Efficiency of Ligand-Binding Protein Design with Molecular Dynamics Simulations.” *Journal of Chemical Theory and Computation* 15 (10): 5703–15.](http://paperpile.com/b/1ZjmK7/meho)

[Caram, Justin R., Sandra Doria, Dörthe M. Eisele, Francesca S. Freyria, Timothy S. Sinclair, Patrick Rebentrost, Seth Lloyd, and Moungi G. Bawendi. 2016. “Room-Temperature Micron-Scale Exciton Migration in a Stabilized Emissive Molecular Aggregate.” *Nano Letters* 16 (11): 6808–15.](http://paperpile.com/b/1ZjmK7/9vhZ)

[Curutchet, Carles, Jacob Kongsted, Aurora Muñoz-Losa, Hoda Hossein-Nejad, Gregory D. Scholes, and Benedetta Mennucci. 2011. “Photosynthetic Light-Harvesting Is Tuned by the Heterogeneous Polarizable Environment of the Protein.” *Journal of the American Chemical Society* 133 (9): 3078–84.](http://paperpile.com/b/1ZjmK7/Bhah)

[Dyer, Kevin N., Michal Hammel, Robert P. Rambo, Susan E. Tsutakawa, Ivan Rodic, Scott Classen, John A. Tainer, and Greg L. Hura. 2014. “High-Throughput SAXS for the Characterization of Biomolecules in Solution: A Practical Approach.” *Methods in Molecular Biology*  1091: 245–58.](http://paperpile.com/b/1ZjmK7/t6an)

[Georgakopoulou, Sofia, Raoul N. Frese, Evelyn Johnson, Corline Koolhaas, Richard J. Cogdell, Rienk van Grondelle, and Gert van der Zwan. 2002. “Absorption and CD Spectroscopy and Modeling of Various LH2 Complexes from Purple Bacteria.” *Biophysical Journal* 82 (4): 2184–97.](http://paperpile.com/b/1ZjmK7/DCGF)

[Huang, Xia, Cvetelin Vasilev, and C. Neil Hunter. 2020. “Excitation Energy Transfer between Monomolecular Layers of Light Harvesting LH2 and LH1-Reaction Centre Complexes Printed on a Glass Substrate.” *Lab on a Chip* 20 (14): 2529–38.](http://paperpile.com/b/1ZjmK7/Y3Ky)

[Kim, Henry S., Anne Martel, Eric Girard, Martine Moulin, Michael Härtlein, Dominique Madern, Martin Blackledge, Bruno Franzetti, and Frank Gabel. 2016. “SAXS/SANS on Supercharged Proteins Reveals Residue-Specific Modifications of the Hydration Shell.” *Biophysical Journal* 110 (10): 2185–94.](http://paperpile.com/b/1ZjmK7/fgcV)

[Manalastas-Cantos, Karen, Petr V. Konarev, Nelly R. Hajizadeh, Alexey G. Kikhney, Maxim V. Petoukhov, Dmitry S. Molodenskiy, Alejandro Panjkovich, et al. 2021. “ATSAS 3.0: Expanded Functionality and New Tools for Small-Angle Scattering Data Analysis.” *Journal of Applied Crystallography* 54 (Pt 1): 343–55.](http://paperpile.com/b/1ZjmK7/v6Nn)

[Punjani, Ali, John L. Rubinstein, David J. Fleet, and Marcus A. Brubaker. 2017. “cryoSPARC: Algorithms for Rapid Unsupervised Cryo-EM Structure Determination.” *Nature Methods* 14 (3): 290–96.](http://paperpile.com/b/1ZjmK7/cHz4u)

[Renger, Thomas, and Frank Müh. 2012. “Theory of Excitonic Couplings in Dielectric Media : Foundation of Poisson-TrEsp Method and Application to Photosystem I Trimers.” *Photosynthesis Research* 111 (1-2): 47–52.](http://paperpile.com/b/1ZjmK7/fbXe)

[Schneidman-Duhovny, Dina, Michal Hammel, John A. Tainer, and Andrej Sali. 2013. “Accurate SAXS Profile Computation and Its Assessment by Contrast Variation Experiments.” *Biophysical Journal* 105 (4): 962–74.](http://paperpile.com/b/1ZjmK7/20Kw)

[———. 2016. “FoXS, FoXSDock and MultiFoXS: Single-State and Multi-State Structural Modeling of Proteins and Their Complexes Based on SAXS Profiles.” *Nucleic Acids Research* 44 (W1): W424–29.](http://paperpile.com/b/1ZjmK7/uAZA)

[Seibt, Joachim, Dominik Lindorfer, and Thomas Renger. 2022. “Signatures of Intramolecular Vibrational and Vibronic Qx–Qycoupling Effects in Absorption and CD Spectra of Chlorophyll Dimers.” *Photosynthesis Research*, August. https://doi.org/](http://paperpile.com/b/1ZjmK7/ysdO)[10.1007/s11120-022-00946-3](http://dx.doi.org/10.1007/s11120-022-00946-3)[.](http://paperpile.com/b/1ZjmK7/ysdO)

[Svergun, D. I., S. Richard, M. H. Koch, Z. Sayers, S. Kuprin, and G. Zaccai. 1998. “Protein Hydration in Solution: Experimental Observation by X-Ray and Neutron Scattering.” *Proceedings of the National Academy of Sciences of the United States of America* 95 (5): 2267–72.](http://paperpile.com/b/1ZjmK7/9VMu)

[Weber, G., and F. W. J. Teale. 1957. “Determination of the Absolute Quantum Yield of Fluorescent Solutions.” *Transactions of the Faraday Society* 53 (0): 646–55.](http://paperpile.com/b/1ZjmK7/K8BN)

[Williams, Christopher J., Jeffrey J. Headd, Nigel W. Moriarty, Michael G. Prisant, Lizbeth L. Videau, Lindsay N. Deis, Vishal Verma, et al. 2018. “MolProbity: More and Better Reference Data for Improved All-Atom Structure Validation.” *Protein Science: A Publication of the Protein Society* 27 (1): 293–315.](http://paperpile.com/b/1ZjmK7/pWK1T)
